# Supplementary material for: A Novel Lossless Encoding Algorithm for Data Compression
Source: Research Square preprint supplement (doi:10.21203/rs.3.rs-499681/v1), 2021-05-24
Supplement: Supplementary file 1 [file 2dccae1e91b1ba97cbadce35.xlsx]

## Sheet: Sheet1
Genome	Genome Size (bytes)	Window Length	Label Length	Tool	Compression Ratio (%)	Compression Time (seconds)	Decompression Time (seconds)	Compression Speed (MB/s)	Decompression Speed (MB/s)
DNA-Genome-Picea-abies-GCA_900067695.1-2016-11-09.one_line	11960690255	25	1	OST-DNA-bcm	24.16	22081	8387	0.5166	0.3286
DNA-Genome-Picea-abies-GCA_900067695.1-2016-11-09.one_line	11960690255	50	1	OST-DNA-bcm	23.69	13027	3824	0.8756	0.7066
DNA-Genome-Picea-abies-GCA_900067695.1-2016-11-09.one_line	11960690255	100	1	OST-DNA-bcm	23.51	10555	3157	1.0807	0.8494
DNA-Genome-Picea-abies-GCA_900067695.1-2016-11-09.one_line	11960690255	125	1	OST-DNA-bcm	23.49	10050	3202	1.135	0.8368
DNA-Genome-Picea-abies-GCA_900067695.1-2016-11-09.one_line	11960690255	150	1	OST-DNA-bcm	23.47	9827	3297	1.1607	0.812
DNA-Genome-Picea-abies-GCA_900067695.1-2016-11-09.one_line	11960690255	250	1	OST-DNA-bcm	23.47	8669	3142	1.3158	0.852
DNA-Genome-Picea-abies-GCA_900067695.1-2016-11-09.one_line	11960690255	500	1	OST-DNA-bcm	23.5	7349	3591	1.5521	0.7465
DNA-Genome-Picea-abies-GCA_900067695.1-2016-11-09.one_line	11960690255	750	1	OST-DNA-bcm	23.53	6775	3448	1.6836	0.7784
DNA-Genome-Picea-abies-GCA_900067695.1-2016-11-09.one_line	11960690255	1000	1	OST-DNA-bcm	23.55	6038	2727	1.8891	0.9851
DNA-Genome-Picea-abies-GCA_900067695.1-2016-11-09.one_line	11960690255	2500	1	OST-DNA-bcm	23.61	6003	3156	1.9002	0.8533
DNA-Genome-Picea-abies-GCA_900067695.1-2016-11-09.one_line	11960690255	5000	1	OST-DNA-bcm	23.64	5748	3180	1.9844	0.848
DNA-Genome-Picea-abies-GCA_900067695.1-2016-11-09.one_line	11960690255	10000	1	OST-DNA-bcm	23.66	5769	3049	1.9772	0.8851
DNA-Genome-Picea-abies-GCA_900067695.1-2016-11-09.one_line	11960690255	25	2	OST-DNA-bcm	24.22	22535	13962	0.5062	0.1979
DNA-Genome-Picea-abies-GCA_900067695.1-2016-11-09.one_line	11960690255	50	2	OST-DNA-bcm	23.6	13358	4743	0.8539	0.5676
DNA-Genome-Picea-abies-GCA_900067695.1-2016-11-09.one_line	11960690255	100	2	OST-DNA-bcm	23.36	10367	3287	1.1003	0.8106
DNA-Genome-Picea-abies-GCA_900067695.1-2016-11-09.one_line	11960690255	125	2	OST-DNA-bcm	23.34	10294	3313	1.1081	0.8036
DNA-Genome-Picea-abies-GCA_900067695.1-2016-11-09.one_line	11960690255	150	2	OST-DNA-bcm	23.33	9537	3314	1.196	0.803
DNA-Genome-Picea-abies-GCA_900067695.1-2016-11-09.one_line	11960690255	250	2	OST-DNA-bcm	23.35	8854	3130	1.2883	0.8509
DNA-Genome-Picea-abies-GCA_900067695.1-2016-11-09.one_line	11960690255	500	2	OST-DNA-bcm	23.43	7335	3559	1.5551	0.7509
DNA-Genome-Picea-abies-GCA_900067695.1-2016-11-09.one_line	11960690255	750	2	OST-DNA-bcm	23.48	7042	3596	1.6198	0.7448
DNA-Genome-Picea-abies-GCA_900067695.1-2016-11-09.one_line	11960690255	1000	2	OST-DNA-bcm	23.51	5911	2692	1.9297	0.9962
DNA-Genome-Picea-abies-GCA_900067695.1-2016-11-09.one_line	11960690255	2500	2	OST-DNA-bcm	23.6	6142	3055	1.8571	0.8812
DNA-Genome-Picea-abies-GCA_900067695.1-2016-11-09.one_line	11960690255	5000	2	OST-DNA-bcm	23.63	5866	3118	1.9445	0.8645
DNA-Genome-Picea-abies-GCA_900067695.1-2016-11-09.one_line	11960690255	10000	2	OST-DNA-bcm	23.66	5833	3136	1.9555	0.8606
DNA-Genome-Picea-abies-GCA_900067695.1-2016-11-09.one_line	11960690255	25	3	OST-DNA-bcm	24.2	22792	15977	0.5005	0.1728
DNA-Genome-Picea-abies-GCA_900067695.1-2016-11-09.one_line	11960690255	50	3	OST-DNA-bcm	23.59	13678	4852	0.8339	0.5546
DNA-Genome-Picea-abies-GCA_900067695.1-2016-11-09.one_line	11960690255	100	3	OST-DNA-bcm	23.36	10651	3257	1.0709	0.8181
DNA-Genome-Picea-abies-GCA_900067695.1-2016-11-09.one_line	11960690255	125	3	OST-DNA-bcm	23.34	10298	3331	1.1077	0.7992
DNA-Genome-Picea-abies-GCA_900067695.1-2016-11-09.one_line	11960690255	150	3	OST-DNA-bcm	23.33	9754	3249	1.1694	0.8191
DNA-Genome-Picea-abies-GCA_900067695.1-2016-11-09.one_line	11960690255	250	3	OST-DNA-bcm	23.35	9076	3120	1.2568	0.8537
DNA-Genome-Picea-abies-GCA_900067695.1-2016-11-09.one_line	11960690255	500	3	OST-DNA-bcm	23.43	7179	3553	1.5889	0.7522
DNA-Genome-Picea-abies-GCA_900067695.1-2016-11-09.one_line	11960690255	750	3	OST-DNA-bcm	23.48	7065	3640	1.6145	0.7358
DNA-Genome-Picea-abies-GCA_900067695.1-2016-11-09.one_line	11960690255	1000	3	OST-DNA-bcm	23.51	6039	2742	1.8888	0.978
DNA-Genome-Picea-abies-GCA_900067695.1-2016-11-09.one_line	11960690255	2500	3	OST-DNA-bcm	23.6	6056	3102	1.8835	0.8678
DNA-Genome-Picea-abies-GCA_900067695.1-2016-11-09.one_line	11960690255	5000	3	OST-DNA-bcm	23.63	6037	3051	1.8894	0.8834
DNA-Genome-Picea-abies-GCA_900067695.1-2016-11-09.one_line	11960690255	10000	3	OST-DNA-bcm	23.66	5823	3111	1.9589	0.8675
DNA-Genome-Picea-abies-GCA_900067695.1-2016-11-09.one_line	11960690255	25	4	OST-DNA-bcm	24.19	23299	15931	0.4896	0.1732
DNA-Genome-Picea-abies-GCA_900067695.1-2016-11-09.one_line	11960690255	50	4	OST-DNA-bcm	23.58	13988	4836	0.8155	0.5562
DNA-Genome-Picea-abies-GCA_900067695.1-2016-11-09.one_line	11960690255	100	4	OST-DNA-bcm	23.36	10914	3223	1.0451	0.8267
DNA-Genome-Picea-abies-GCA_900067695.1-2016-11-09.one_line	11960690255	125	4	OST-DNA-bcm	23.33	10351	3232	1.102	0.8234
DNA-Genome-Picea-abies-GCA_900067695.1-2016-11-09.one_line	11960690255	150	4	OST-DNA-bcm	23.33	9994	3153	1.1413	0.844
DNA-Genome-Picea-abies-GCA_900067695.1-2016-11-09.one_line	11960690255	250	4	OST-DNA-bcm	23.35	9200	3157	1.2398	0.8437
DNA-Genome-Picea-abies-GCA_900067695.1-2016-11-09.one_line	11960690255	500	4	OST-DNA-bcm	23.42	7358	3470	1.5502	0.7699
DNA-Genome-Picea-abies-GCA_900067695.1-2016-11-09.one_line	11960690255	750	4	OST-DNA-bcm	23.47	7165	3528	1.592	0.7588
DNA-Genome-Picea-abies-GCA_900067695.1-2016-11-09.one_line	11960690255	1000	4	OST-DNA-bcm	23.5	6050	2640	1.8854	1.0154
DNA-Genome-Picea-abies-GCA_900067695.1-2016-11-09.one_line	11960690255	2500	4	OST-DNA-bcm	23.58	5815	3062	1.9616	0.8784
DNA-Genome-Picea-abies-GCA_900067695.1-2016-11-09.one_line	11960690255	5000	4	OST-DNA-bcm	23.62	5958	3063	1.9145	0.8796
DNA-Genome-Picea-abies-GCA_900067695.1-2016-11-09.one_line	11960690255	10000	4	OST-DNA-bcm	23.65	5699	3149	2.0015	0.8567
DNA-Genome-Picea-abies-GCA_900067695.1-2016-11-09.one_line	11960690255	25	5	OST-DNA-bcm	24.19	23454	15897	0.4863	0.1736
DNA-Genome-Picea-abies-GCA_900067695.1-2016-11-09.one_line	11960690255	50	5	OST-DNA-bcm	23.58	13990	4827	0.8153	0.5572
DNA-Genome-Picea-abies-GCA_900067695.1-2016-11-09.one_line	11960690255	100	5	OST-DNA-bcm	23.36	10928	3246	1.0438	0.8209
DNA-Genome-Picea-abies-GCA_900067695.1-2016-11-09.one_line	11960690255	125	5	OST-DNA-bcm	23.33	10330	3317	1.1042	0.8023
DNA-Genome-Picea-abies-GCA_900067695.1-2016-11-09.one_line	11960690255	150	5	OST-DNA-bcm	23.33	9826	3272	1.1609	0.8133
DNA-Genome-Picea-abies-GCA_900067695.1-2016-11-09.one_line	11960690255	250	5	OST-DNA-bcm	23.35	9128	3174	1.2496	0.8391
DNA-Genome-Picea-abies-GCA_900067695.1-2016-11-09.one_line	11960690255	500	5	OST-DNA-bcm	23.42	7362	3508	1.5494	0.7615
DNA-Genome-Picea-abies-GCA_900067695.1-2016-11-09.one_line	11960690255	750	5	OST-DNA-bcm	23.47	7086	3330	1.6097	0.8039
DNA-Genome-Picea-abies-GCA_900067695.1-2016-11-09.one_line	11960690255	1000	5	OST-DNA-bcm	23.5	5987	2676	1.9052	1.0017
DNA-Genome-Picea-abies-GCA_900067695.1-2016-11-09.one_line	11960690255	2500	5	OST-DNA-bcm	23.58	5939	2858	1.9206	0.9411
DNA-Genome-Picea-abies-GCA_900067695.1-2016-11-09.one_line	11960690255	5000	5	OST-DNA-bcm	23.62	5932	3066	1.9229	0.8787
DNA-Genome-Picea-abies-GCA_900067695.1-2016-11-09.one_line	11960690255	10000	5	OST-DNA-bcm	23.65	5904	3072	1.932	0.8781
DNA-Genome-Picea-abies-GCA_900067695.1-2016-11-09.one_line	11960690255	25	1	OST-DNA-brotli	24.58	71356	6869	0.1599	0.4082
DNA-Genome-Picea-abies-GCA_900067695.1-2016-11-09.one_line	11960690255	50	1	OST-DNA-brotli	22.85	62682	1447	0.182	1.8013
DNA-Genome-Picea-abies-GCA_900067695.1-2016-11-09.one_line	11960690255	100	1	OST-DNA-brotli	21.74	57251	533	0.1992	4.6525
DNA-Genome-Picea-abies-GCA_900067695.1-2016-11-09.one_line	11960690255	125	1	OST-DNA-brotli	21.51	56735	544	0.2011	4.5102
DNA-Genome-Picea-abies-GCA_900067695.1-2016-11-09.one_line	11960690255	150	1	OST-DNA-brotli	21.35	56358	442	0.2024	5.5098
DNA-Genome-Picea-abies-GCA_900067695.1-2016-11-09.one_line	11960690255	250	1	OST-DNA-brotli	21.04	54899	353	0.2078	6.7987
DNA-Genome-Picea-abies-GCA_900067695.1-2016-11-09.one_line	11960690255	500	1	OST-DNA-brotli	20.88	54136	299	0.2107	7.9655
DNA-Genome-Picea-abies-GCA_900067695.1-2016-11-09.one_line	11960690255	750	1	OST-DNA-brotli	20.86	54509	280	0.2093	8.4979
DNA-Genome-Picea-abies-GCA_900067695.1-2016-11-09.one_line	11960690255	1000	1	OST-DNA-brotli	20.87	54887	277	0.2078	8.5941
DNA-Genome-Picea-abies-GCA_900067695.1-2016-11-09.one_line	11960690255	2500	1	OST-DNA-brotli	20.94	55190	269	0.2067	8.8793
DNA-Genome-Picea-abies-GCA_900067695.1-2016-11-09.one_line	11960690255	5000	1	OST-DNA-brotli	20.98	56073	255	0.2034	9.3847
DNA-Genome-Picea-abies-GCA_900067695.1-2016-11-09.one_line	11960690255	10000	1	OST-DNA-brotli	20.98	55723	241	0.2047	9.9299
DNA-Genome-Picea-abies-GCA_900067695.1-2016-11-09.one_line	11960690255	25	2	OST-DNA-brotli	24.82	71383	12081	0.1598	0.2343
DNA-Genome-Picea-abies-GCA_900067695.1-2016-11-09.one_line	11960690255	50	2	OST-DNA-brotli	22.86	62354	2275	0.1829	1.1462
DNA-Genome-Picea-abies-GCA_900067695.1-2016-11-09.one_line	11960690255	100	2	OST-DNA-brotli	21.62	57234	564	0.1993	4.3725
DNA-Genome-Picea-abies-GCA_900067695.1-2016-11-09.one_line	11960690255	125	2	OST-DNA-brotli	21.37	56378	513	0.2023	4.7516
DNA-Genome-Picea-abies-GCA_900067695.1-2016-11-09.one_line	11960690255	150	2	OST-DNA-brotli	21.2	55754	459	0.2046	5.2684
DNA-Genome-Picea-abies-GCA_900067695.1-2016-11-09.one_line	11960690255	250	2	OST-DNA-brotli	20.91	54650	359	0.2087	6.6438
DNA-Genome-Picea-abies-GCA_900067695.1-2016-11-09.one_line	11960690255	500	2	OST-DNA-brotli	20.79	53881	303	0.2117	7.8265
DNA-Genome-Picea-abies-GCA_900067695.1-2016-11-09.one_line	11960690255	750	2	OST-DNA-brotli	20.78	54338	281	0.2099	8.4352
DNA-Genome-Picea-abies-GCA_900067695.1-2016-11-09.one_line	11960690255	1000	2	OST-DNA-brotli	20.8	54548	285	0.2091	8.3248
DNA-Genome-Picea-abies-GCA_900067695.1-2016-11-09.one_line	11960690255	2500	2	OST-DNA-brotli	20.87	54983	261	0.2075	9.1209
DNA-Genome-Picea-abies-GCA_900067695.1-2016-11-09.one_line	11960690255	5000	2	OST-DNA-brotli	20.89	55362	255	0.206	9.3445
DNA-Genome-Picea-abies-GCA_900067695.1-2016-11-09.one_line	11960690255	10000	2	OST-DNA-brotli	20.93	56115	242	0.2033	9.8653
DNA-Genome-Picea-abies-GCA_900067695.1-2016-11-09.one_line	11960690255	25	3	OST-DNA-brotli	24.79	72020	13852	0.1584	0.2041
DNA-Genome-Picea-abies-GCA_900067695.1-2016-11-09.one_line	11960690255	50	3	OST-DNA-brotli	22.83	62820	2276	0.1816	1.1442
DNA-Genome-Picea-abies-GCA_900067695.1-2016-11-09.one_line	11960690255	100	3	OST-DNA-brotli	21.61	57038	560	0.2	4.4017
DNA-Genome-Picea-abies-GCA_900067695.1-2016-11-09.one_line	11960690255	125	3	OST-DNA-brotli	21.36	56407	520	0.2022	4.6855
DNA-Genome-Picea-abies-GCA_900067695.1-2016-11-09.one_line	11960690255	150	3	OST-DNA-brotli	21.19	55869	465	0.2042	5.198
DNA-Genome-Picea-abies-GCA_900067695.1-2016-11-09.one_line	11960690255	250	3	OST-DNA-brotli	20.91	54686	359	0.2086	6.6438
DNA-Genome-Picea-abies-GCA_900067695.1-2016-11-09.one_line	11960690255	500	3	OST-DNA-brotli	20.78	53965	300	0.2114	7.901
DNA-Genome-Picea-abies-GCA_900067695.1-2016-11-09.one_line	11960690255	750	3	OST-DNA-brotli	20.77	55186	269	0.2067	8.8073
DNA-Genome-Picea-abies-GCA_900067695.1-2016-11-09.one_line	11960690255	1000	3	OST-DNA-brotli	20.78	54444	281	0.2095	8.4352
DNA-Genome-Picea-abies-GCA_900067695.1-2016-11-09.one_line	11960690255	2500	3	OST-DNA-brotli	20.85	54984	258	0.2075	9.2181
DNA-Genome-Picea-abies-GCA_900067695.1-2016-11-09.one_line	11960690255	5000	3	OST-DNA-brotli	20.88	55966	247	0.2038	9.6425
DNA-Genome-Picea-abies-GCA_900067695.1-2016-11-09.one_line	11960690255	10000	3	OST-DNA-brotli	20.92	56402	231	0.2022	10.3301
DNA-Genome-Picea-abies-GCA_900067695.1-2016-11-09.one_line	11960690255	25	4	OST-DNA-brotli	23.62	73086	13633	0.1561	0.1976
DNA-Genome-Picea-abies-GCA_900067695.1-2016-11-09.one_line	11960690255	50	4	OST-DNA-brotli	21.72	63198	2293	0.1805	1.0805
DNA-Genome-Picea-abies-GCA_900067695.1-2016-11-09.one_line	11960690255	100	4	OST-DNA-brotli	20.55	58406	477	0.1953	4.9142
DNA-Genome-Picea-abies-GCA_900067695.1-2016-11-09.one_line	11960690255	125	4	OST-DNA-brotli	20.31	56701	428	0.2012	5.4128
DNA-Genome-Picea-abies-GCA_900067695.1-2016-11-09.one_line	11960690255	150	4	OST-DNA-brotli	20.17	55780	400	0.2045	5.7518
DNA-Genome-Picea-abies-GCA_900067695.1-2016-11-09.one_line	11960690255	250	4	OST-DNA-brotli	19.91	55114	310	0.207	7.326
DNA-Genome-Picea-abies-GCA_900067695.1-2016-11-09.one_line	11960690255	500	4	OST-DNA-brotli	19.82	53978	259	0.2113	8.7289
DNA-Genome-Picea-abies-GCA_900067695.1-2016-11-09.one_line	11960690255	750	4	OST-DNA-brotli	19.84	54566	250	0.209	9.0523
DNA-Genome-Picea-abies-GCA_900067695.1-2016-11-09.one_line	11960690255	1000	4	OST-DNA-brotli	19.88	54367	251	0.2098	9.0344
DNA-Genome-Picea-abies-GCA_900067695.1-2016-11-09.one_line	11960690255	2500	4	OST-DNA-brotli	20.05	55430	242	0.2058	9.4505
DNA-Genome-Picea-abies-GCA_900067695.1-2016-11-09.one_line	11960690255	5000	4	OST-DNA-brotli	20.18	55154	232	0.2068	9.9218
DNA-Genome-Picea-abies-GCA_900067695.1-2016-11-09.one_line	11960690255	10000	4	OST-DNA-brotli	20.3	55861	221	0.2042	10.4776
DNA-Genome-Picea-abies-GCA_900067695.1-2016-11-09.one_line	11960690255	25	5	OST-DNA-brotli	23.62	72855	13656	0.1566	0.1973
DNA-Genome-Picea-abies-GCA_900067695.1-2016-11-09.one_line	11960690255	50	5	OST-DNA-brotli	21.72	63301	2277	0.1802	1.0881
DNA-Genome-Picea-abies-GCA_900067695.1-2016-11-09.one_line	11960690255	100	5	OST-DNA-brotli	20.55	57330	492	0.199	4.7643
DNA-Genome-Picea-abies-GCA_900067695.1-2016-11-09.one_line	11960690255	125	5	OST-DNA-brotli	20.31	56340	443	0.2025	5.2295
DNA-Genome-Picea-abies-GCA_900067695.1-2016-11-09.one_line	11960690255	150	5	OST-DNA-brotli	20.17	55890	410	0.2041	5.6115
DNA-Genome-Picea-abies-GCA_900067695.1-2016-11-09.one_line	11960690255	250	5	OST-DNA-brotli	19.91	54771	306	0.2083	7.4217
DNA-Genome-Picea-abies-GCA_900067695.1-2016-11-09.one_line	11960690255	500	5	OST-DNA-brotli	19.82	53982	259	0.2113	8.7289
DNA-Genome-Picea-abies-GCA_900067695.1-2016-11-09.one_line	11960690255	750	5	OST-DNA-brotli	19.84	54552	249	0.2091	9.0886
DNA-Genome-Picea-abies-GCA_900067695.1-2016-11-09.one_line	11960690255	1000	5	OST-DNA-brotli	19.88	54683	245	0.2086	9.2556
DNA-Genome-Picea-abies-GCA_900067695.1-2016-11-09.one_line	11960690255	2500	5	OST-DNA-brotli	20.05	55819	241	0.2043	9.4897
DNA-Genome-Picea-abies-GCA_900067695.1-2016-11-09.one_line	11960690255	5000	5	OST-DNA-brotli	20.18	55287	238	0.2063	9.6716
DNA-Genome-Picea-abies-GCA_900067695.1-2016-11-09.one_line	11960690255	10000	5	OST-DNA-brotli	20.3	55599	221	0.2052	10.4776
DNA-Genome-Picea-abies-GCA_900067695.1-2016-11-09.one_line	11960690255	25	1	OST-DNA-bsc	24.34	25061	7326	0.4552	0.379
DNA-Genome-Picea-abies-GCA_900067695.1-2016-11-09.one_line	11960690255	50	1	OST-DNA-bsc	23.74	16325	2855	0.6987	0.9485
DNA-Genome-Picea-abies-GCA_900067695.1-2016-11-09.one_line	11960690255	100	1	OST-DNA-bsc	23.5	11023	2546	1.0348	1.0528
DNA-Genome-Picea-abies-GCA_900067695.1-2016-11-09.one_line	11960690255	125	1	OST-DNA-bsc	23.46	9822	2281	1.1613	1.1732
DNA-Genome-Picea-abies-GCA_900067695.1-2016-11-09.one_line	11960690255	150	1	OST-DNA-bsc	23.44	8674	1772	1.315	1.5089
DNA-Genome-Picea-abies-GCA_900067695.1-2016-11-09.one_line	11960690255	250	1	OST-DNA-bsc	23.43	7008	1605	1.6277	1.6652
DNA-Genome-Picea-abies-GCA_900067695.1-2016-11-09.one_line	11960690255	500	1	OST-DNA-bsc	23.47	5780	1455	1.9735	1.84
DNA-Genome-Picea-abies-GCA_900067695.1-2016-11-09.one_line	11960690255	750	1	OST-DNA-bsc	23.5	5408	1459	2.1092	1.8373
DNA-Genome-Picea-abies-GCA_900067695.1-2016-11-09.one_line	11960690255	1000	1	OST-DNA-bsc	23.52	5537	1692	2.0601	1.5856
DNA-Genome-Picea-abies-GCA_900067695.1-2016-11-09.one_line	11960690255	2500	1	OST-DNA-bsc	23.6	5019	1341	2.2727	2.0074
DNA-Genome-Picea-abies-GCA_900067695.1-2016-11-09.one_line	11960690255	5000	1	OST-DNA-bsc	23.64	4920	1306	2.3184	2.0647
DNA-Genome-Picea-abies-GCA_900067695.1-2016-11-09.one_line	11960690255	10000	1	OST-DNA-bsc	23.67	4720	1325	2.4167	2.0377
DNA-Genome-Picea-abies-GCA_900067695.1-2016-11-09.one_line	11960690255	25	2	OST-DNA-bsc	24.43	25383	12516	0.4494	0.2226
DNA-Genome-Picea-abies-GCA_900067695.1-2016-11-09.one_line	11960690255	50	2	OST-DNA-bsc	23.64	16404	3957	0.6954	0.6815
DNA-Genome-Picea-abies-GCA_900067695.1-2016-11-09.one_line	11960690255	100	2	OST-DNA-bsc	23.34	11256	2750	1.0134	0.9681
DNA-Genome-Picea-abies-GCA_900067695.1-2016-11-09.one_line	11960690255	125	2	OST-DNA-bsc	23.3	10054	2586	1.1345	1.0277
DNA-Genome-Picea-abies-GCA_900067695.1-2016-11-09.one_line	11960690255	150	2	OST-DNA-bsc	23.29	8859	1896	1.2876	1.4012
DNA-Genome-Picea-abies-GCA_900067695.1-2016-11-09.one_line	11960690255	250	2	OST-DNA-bsc	23.3	6992	1617	1.6314	1.6436
DNA-Genome-Picea-abies-GCA_900067695.1-2016-11-09.one_line	11960690255	500	2	OST-DNA-bsc	23.39	5873	1478	1.9422	1.8051
DNA-Genome-Picea-abies-GCA_900067695.1-2016-11-09.one_line	11960690255	750	2	OST-DNA-bsc	23.45	5555	1478	2.0534	1.8098
DNA-Genome-Picea-abies-GCA_900067695.1-2016-11-09.one_line	11960690255	1000	2	OST-DNA-bsc	23.49	5660	1806	2.0153	1.4836
DNA-Genome-Picea-abies-GCA_900067695.1-2016-11-09.one_line	11960690255	2500	2	OST-DNA-bsc	23.59	5159	1334	2.211	2.0171
DNA-Genome-Picea-abies-GCA_900067695.1-2016-11-09.one_line	11960690255	5000	2	OST-DNA-bsc	23.63	4918	1309	2.3194	2.0591
DNA-Genome-Picea-abies-GCA_900067695.1-2016-11-09.one_line	11960690255	10000	2	OST-DNA-bsc	23.67	4718	1303	2.4177	2.0721
DNA-Genome-Picea-abies-GCA_900067695.1-2016-11-09.one_line	11960690255	25	3	OST-DNA-bsc	24.4	25117	14302	0.4541	0.1946
DNA-Genome-Picea-abies-GCA_900067695.1-2016-11-09.one_line	11960690255	50	3	OST-DNA-bsc	23.63	17006	3949	0.6707	0.6825
DNA-Genome-Picea-abies-GCA_900067695.1-2016-11-09.one_line	11960690255	100	3	OST-DNA-bsc	23.34	11587	2820	0.9844	0.9441
DNA-Genome-Picea-abies-GCA_900067695.1-2016-11-09.one_line	11960690255	125	3	OST-DNA-bsc	23.31	10299	2255	1.1075	1.1791
DNA-Genome-Picea-abies-GCA_900067695.1-2016-11-09.one_line	11960690255	150	3	OST-DNA-bsc	23.29	9119	2023	1.2509	1.3132
DNA-Genome-Picea-abies-GCA_900067695.1-2016-11-09.one_line	11960690255	250	3	OST-DNA-bsc	23.3	7317	1802	1.5589	1.4749
DNA-Genome-Picea-abies-GCA_900067695.1-2016-11-09.one_line	11960690255	500	3	OST-DNA-bsc	23.39	6169	1506	1.849	1.7716
DNA-Genome-Picea-abies-GCA_900067695.1-2016-11-09.one_line	11960690255	750	3	OST-DNA-bsc	23.45	4910	1494	2.3231	1.7904
DNA-Genome-Picea-abies-GCA_900067695.1-2016-11-09.one_line	11960690255	1000	3	OST-DNA-bsc	23.49	5557	1636	2.0527	1.6378
DNA-Genome-Picea-abies-GCA_900067695.1-2016-11-09.one_line	11960690255	2500	3	OST-DNA-bsc	23.59	5183	1739	2.2008	1.5473
DNA-Genome-Picea-abies-GCA_900067695.1-2016-11-09.one_line	11960690255	5000	3	OST-DNA-bsc	23.63	4936	1464	2.3109	1.8411
DNA-Genome-Picea-abies-GCA_900067695.1-2016-11-09.one_line	11960690255	10000	3	OST-DNA-bsc	23.66	4828	1320	2.3626	2.0445
DNA-Genome-Picea-abies-GCA_900067695.1-2016-11-09.one_line	11960690255	25	4	OST-DNA-bsc	24.39	25821	14401	0.4418	0.1932
DNA-Genome-Picea-abies-GCA_900067695.1-2016-11-09.one_line	11960690255	50	4	OST-DNA-bsc	23.63	17070	3816	0.6682	0.7063
DNA-Genome-Picea-abies-GCA_900067695.1-2016-11-09.one_line	11960690255	100	4	OST-DNA-bsc	23.34	11776	2885	0.9686	0.9228
DNA-Genome-Picea-abies-GCA_900067695.1-2016-11-09.one_line	11960690255	125	4	OST-DNA-bsc	23.31	10467	2481	1.0898	1.0717
DNA-Genome-Picea-abies-GCA_900067695.1-2016-11-09.one_line	11960690255	150	4	OST-DNA-bsc	23.29	9564	2179	1.1927	1.2192
DNA-Genome-Picea-abies-GCA_900067695.1-2016-11-09.one_line	11960690255	250	4	OST-DNA-bsc	23.3	7259	1699	1.5714	1.5643
DNA-Genome-Picea-abies-GCA_900067695.1-2016-11-09.one_line	11960690255	500	4	OST-DNA-bsc	23.39	6353	1503	1.7955	1.7751
DNA-Genome-Picea-abies-GCA_900067695.1-2016-11-09.one_line	11960690255	750	4	OST-DNA-bsc	23.45	5662	1474	2.0146	1.8147
DNA-Genome-Picea-abies-GCA_900067695.1-2016-11-09.one_line	11960690255	1000	4	OST-DNA-bsc	23.48	5672	1904	2.011	1.4067
DNA-Genome-Picea-abies-GCA_900067695.1-2016-11-09.one_line	11960690255	2500	4	OST-DNA-bsc	23.58	5330	1438	2.1401	1.8704
DNA-Genome-Picea-abies-GCA_900067695.1-2016-11-09.one_line	11960690255	5000	4	OST-DNA-bsc	23.63	5136	1399	2.2209	1.9266
DNA-Genome-Picea-abies-GCA_900067695.1-2016-11-09.one_line	11960690255	10000	4	OST-DNA-bsc	23.66	4902	1315	2.3269	2.0523
DNA-Genome-Picea-abies-GCA_900067695.1-2016-11-09.one_line	11960690255	25	5	OST-DNA-bsc	24.39	26049	14275	0.4379	0.1949
DNA-Genome-Picea-abies-GCA_900067695.1-2016-11-09.one_line	11960690255	50	5	OST-DNA-bsc	23.63	17185	3808	0.6638	0.7078
DNA-Genome-Picea-abies-GCA_900067695.1-2016-11-09.one_line	11960690255	100	5	OST-DNA-bsc	23.34	11982	2936	0.952	0.9068
DNA-Genome-Picea-abies-GCA_900067695.1-2016-11-09.one_line	11960690255	125	5	OST-DNA-bsc	23.31	10587	2544	1.0774	1.0452
DNA-Genome-Picea-abies-GCA_900067695.1-2016-11-09.one_line	11960690255	150	5	OST-DNA-bsc	23.29	9977	2254	1.1433	1.1786
DNA-Genome-Picea-abies-GCA_900067695.1-2016-11-09.one_line	11960690255	250	5	OST-DNA-bsc	23.3	7771	1620	1.4678	1.6406
DNA-Genome-Picea-abies-GCA_900067695.1-2016-11-09.one_line	11960690255	500	5	OST-DNA-bsc	23.39	6089	1438	1.8733	1.8554
DNA-Genome-Picea-abies-GCA_900067695.1-2016-11-09.one_line	11960690255	750	5	OST-DNA-bsc	23.45	4719	1495	2.4172	1.7892
DNA-Genome-Picea-abies-GCA_900067695.1-2016-11-09.one_line	11960690255	1000	5	OST-DNA-bsc	23.48	5817	1890	1.9609	1.4171
DNA-Genome-Picea-abies-GCA_900067695.1-2016-11-09.one_line	11960690255	2500	5	OST-DNA-bsc	23.58	5399	1520	2.1127	1.7695
DNA-Genome-Picea-abies-GCA_900067695.1-2016-11-09.one_line	11960690255	5000	5	OST-DNA-bsc	23.63	5206	1499	2.191	1.7981
DNA-Genome-Picea-abies-GCA_900067695.1-2016-11-09.one_line	11960690255	10000	5	OST-DNA-bsc	23.66	5043	1521	2.2619	1.7744
DNA-Genome-Picea-abies-GCA_900067695.1-2016-11-09.one_line	11960690255	25	1	OST-DNA-bzip2	27.48	20442	7286	0.558	0.4302
DNA-Genome-Picea-abies-GCA_900067695.1-2016-11-09.one_line	11960690255	50	1	OST-DNA-bzip2	27.05	11974	1821	0.9526	1.6944
DNA-Genome-Picea-abies-GCA_900067695.1-2016-11-09.one_line	11960690255	100	1	OST-DNA-bzip2	26.87	10299	1104	1.1075	2.7762
DNA-Genome-Picea-abies-GCA_900067695.1-2016-11-09.one_line	11960690255	125	1	OST-DNA-bzip2	26.84	9046	1130	1.261	2.7093
DNA-Genome-Picea-abies-GCA_900067695.1-2016-11-09.one_line	11960690255	150	1	OST-DNA-bzip2	26.83	8558	1094	1.3329	2.7974
DNA-Genome-Picea-abies-GCA_900067695.1-2016-11-09.one_line	11960690255	250	1	OST-DNA-bzip2	26.8	7447	883	1.5317	3.462
DNA-Genome-Picea-abies-GCA_900067695.1-2016-11-09.one_line	11960690255	500	1	OST-DNA-bzip2	26.8	5996	789	1.9024	3.8745
DNA-Genome-Picea-abies-GCA_900067695.1-2016-11-09.one_line	11960690255	750	1	OST-DNA-bzip2	26.81	5272	772	2.1636	3.9613
DNA-Genome-Picea-abies-GCA_900067695.1-2016-11-09.one_line	11960690255	1000	1	OST-DNA-bzip2	26.81	4968	768	2.296	3.9819
DNA-Genome-Picea-abies-GCA_900067695.1-2016-11-09.one_line	11960690255	2500	1	OST-DNA-bzip2	26.83	4190	753	2.7223	4.0643
DNA-Genome-Picea-abies-GCA_900067695.1-2016-11-09.one_line	11960690255	5000	1	OST-DNA-bzip2	26.84	3912	814	2.9158	3.7611
DNA-Genome-Picea-abies-GCA_900067695.1-2016-11-09.one_line	11960690255	10000	1	OST-DNA-bzip2	26.85	3865	805	2.9513	3.8046
DNA-Genome-Picea-abies-GCA_900067695.1-2016-11-09.one_line	11960690255	25	2	OST-DNA-bzip2	27.67	21528	12259	0.5298	0.2575
DNA-Genome-Picea-abies-GCA_900067695.1-2016-11-09.one_line	11960690255	50	2	OST-DNA-bzip2	27.07	12040	2690	0.9474	1.1479
DNA-Genome-Picea-abies-GCA_900067695.1-2016-11-09.one_line	11960690255	100	2	OST-DNA-bzip2	26.82	10624	1442	1.0737	2.1215
DNA-Genome-Picea-abies-GCA_900067695.1-2016-11-09.one_line	11960690255	125	2	OST-DNA-bzip2	26.79	9108	1008	1.2524	3.0316
DNA-Genome-Picea-abies-GCA_900067695.1-2016-11-09.one_line	11960690255	150	2	OST-DNA-bzip2	26.77	8728	1180	1.3069	2.5878
DNA-Genome-Picea-abies-GCA_900067695.1-2016-11-09.one_line	11960690255	250	2	OST-DNA-bzip2	26.75	7641	887	1.4928	3.44
DNA-Genome-Picea-abies-GCA_900067695.1-2016-11-09.one_line	11960690255	500	2	OST-DNA-bzip2	26.77	6203	773	1.8389	3.9503
DNA-Genome-Picea-abies-GCA_900067695.1-2016-11-09.one_line	11960690255	750	2	OST-DNA-bzip2	26.79	5401	814	2.1119	3.7541
DNA-Genome-Picea-abies-GCA_900067695.1-2016-11-09.one_line	11960690255	1000	2	OST-DNA-bzip2	26.8	5165	739	2.2084	4.1366
DNA-Genome-Picea-abies-GCA_900067695.1-2016-11-09.one_line	11960690255	2500	2	OST-DNA-bzip2	26.83	4146	776	2.7512	3.9438
DNA-Genome-Picea-abies-GCA_900067695.1-2016-11-09.one_line	11960690255	5000	2	OST-DNA-bzip2	26.84	3972	834	2.8718	3.6709
DNA-Genome-Picea-abies-GCA_900067695.1-2016-11-09.one_line	11960690255	10000	2	OST-DNA-bzip2	26.85	3921	818	2.9091	3.7441
DNA-Genome-Picea-abies-GCA_900067695.1-2016-11-09.one_line	11960690255	25	3	OST-DNA-bzip2	27.65	21711	13765	0.5254	0.2291
DNA-Genome-Picea-abies-GCA_900067695.1-2016-11-09.one_line	11960690255	50	3	OST-DNA-bzip2	27.06	12625	2911	0.9035	1.0603
DNA-Genome-Picea-abies-GCA_900067695.1-2016-11-09.one_line	11960690255	100	3	OST-DNA-bzip2	26.82	10751	1265	1.061	2.4184
DNA-Genome-Picea-abies-GCA_900067695.1-2016-11-09.one_line	11960690255	125	3	OST-DNA-bzip2	26.79	9547	1148	1.1948	2.6619
DNA-Genome-Picea-abies-GCA_900067695.1-2016-11-09.one_line	11960690255	150	3	OST-DNA-bzip2	26.77	8880	1215	1.2845	2.5132
DNA-Genome-Picea-abies-GCA_900067695.1-2016-11-09.one_line	11960690255	250	3	OST-DNA-bzip2	26.75	7762	878	1.4695	3.4752
DNA-Genome-Picea-abies-GCA_900067695.1-2016-11-09.one_line	11960690255	500	3	OST-DNA-bzip2	26.77	6379	790	1.7881	3.8653
DNA-Genome-Picea-abies-GCA_900067695.1-2016-11-09.one_line	11960690255	750	3	OST-DNA-bzip2	26.79	5141	911	2.2188	3.3544
DNA-Genome-Picea-abies-GCA_900067695.1-2016-11-09.one_line	11960690255	1000	3	OST-DNA-bzip2	26.8	4876	774	2.3393	3.9496
DNA-Genome-Picea-abies-GCA_900067695.1-2016-11-09.one_line	11960690255	2500	3	OST-DNA-bzip2	26.83	4197	764	2.7178	4.0057
DNA-Genome-Picea-abies-GCA_900067695.1-2016-11-09.one_line	11960690255	5000	3	OST-DNA-bzip2	26.84	4121	766	2.7679	3.9968
DNA-Genome-Picea-abies-GCA_900067695.1-2016-11-09.one_line	11960690255	10000	3	OST-DNA-bzip2	26.85	3894	843	2.9293	3.6331
DNA-Genome-Picea-abies-GCA_900067695.1-2016-11-09.one_line	11960690255	25	4	OST-DNA-bzip2	27.65	22674	13784	0.5031	0.2288
DNA-Genome-Picea-abies-GCA_900067695.1-2016-11-09.one_line	11960690255	50	4	OST-DNA-bzip2	27.06	12939	2982	0.8816	1.0351
DNA-Genome-Picea-abies-GCA_900067695.1-2016-11-09.one_line	11960690255	100	4	OST-DNA-bzip2	26.82	11085	1133	1.029	2.7001
DNA-Genome-Picea-abies-GCA_900067695.1-2016-11-09.one_line	11960690255	125	4	OST-DNA-bzip2	26.79	9595	1029	1.1888	2.9697
DNA-Genome-Picea-abies-GCA_900067695.1-2016-11-09.one_line	11960690255	150	4	OST-DNA-bzip2	26.77	8900	1154	1.2816	2.6461
DNA-Genome-Picea-abies-GCA_900067695.1-2016-11-09.one_line	11960690255	250	4	OST-DNA-bzip2	26.75	7840	883	1.4549	3.4556
DNA-Genome-Picea-abies-GCA_900067695.1-2016-11-09.one_line	11960690255	500	4	OST-DNA-bzip2	26.77	6408	772	1.7801	3.9554
DNA-Genome-Picea-abies-GCA_900067695.1-2016-11-09.one_line	11960690255	750	4	OST-DNA-bzip2	26.79	5683	806	2.0071	3.7914
DNA-Genome-Picea-abies-GCA_900067695.1-2016-11-09.one_line	11960690255	1000	4	OST-DNA-bzip2	26.8	5341	743	2.1357	4.1144
DNA-Genome-Picea-abies-GCA_900067695.1-2016-11-09.one_line	11960690255	2500	4	OST-DNA-bzip2	26.83	4584	752	2.4884	4.0697
DNA-Genome-Picea-abies-GCA_900067695.1-2016-11-09.one_line	11960690255	5000	4	OST-DNA-bzip2	26.84	4118	764	2.7699	4.0072
DNA-Genome-Picea-abies-GCA_900067695.1-2016-11-09.one_line	11960690255	10000	4	OST-DNA-bzip2	26.85	4100	801	2.7821	3.8236
DNA-Genome-Picea-abies-GCA_900067695.1-2016-11-09.one_line	11960690255	25	5	OST-DNA-bzip2	27.65	22671	13998	0.5031	0.2253
DNA-Genome-Picea-abies-GCA_900067695.1-2016-11-09.one_line	11960690255	50	5	OST-DNA-bzip2	27.06	13083	2813	0.8719	1.0973
DNA-Genome-Picea-abies-GCA_900067695.1-2016-11-09.one_line	11960690255	100	5	OST-DNA-bzip2	26.82	11051	1114	1.0322	2.7462
DNA-Genome-Picea-abies-GCA_900067695.1-2016-11-09.one_line	11960690255	125	5	OST-DNA-bzip2	26.79	9639	1063	1.1834	2.8747
DNA-Genome-Picea-abies-GCA_900067695.1-2016-11-09.one_line	11960690255	150	5	OST-DNA-bzip2	26.77	8769	1084	1.3008	2.8169
DNA-Genome-Picea-abies-GCA_900067695.1-2016-11-09.one_line	11960690255	250	5	OST-DNA-bzip2	26.75	7609	849	1.4991	3.594
DNA-Genome-Picea-abies-GCA_900067695.1-2016-11-09.one_line	11960690255	500	5	OST-DNA-bzip2	26.77	6372	770	1.7901	3.9656
DNA-Genome-Picea-abies-GCA_900067695.1-2016-11-09.one_line	11960690255	750	5	OST-DNA-bzip2	26.79	5103	1113	2.2353	2.7456
DNA-Genome-Picea-abies-GCA_900067695.1-2016-11-09.one_line	11960690255	1000	5	OST-DNA-bzip2	26.8	5318	784	2.1449	3.8992
DNA-Genome-Picea-abies-GCA_900067695.1-2016-11-09.one_line	11960690255	2500	5	OST-DNA-bzip2	26.83	4728	790	2.4126	3.8739
DNA-Genome-Picea-abies-GCA_900067695.1-2016-11-09.one_line	11960690255	5000	5	OST-DNA-bzip2	26.84	4261	711	2.677	4.306
DNA-Genome-Picea-abies-GCA_900067695.1-2016-11-09.one_line	11960690255	10000	5	OST-DNA-bzip2	26.85	3883	777	2.9376	3.9417
DNA-Genome-Picea-abies-GCA_900067695.1-2016-11-09.one_line	11960690255	25	1	OST-DNA-lrzip	22.78	42283	7093	0.2698	0.3663
DNA-Genome-Picea-abies-GCA_900067695.1-2016-11-09.one_line	11960690255	50	1	OST-DNA-lrzip	20.55	33963	1529	0.3359	1.5331
DNA-Genome-Picea-abies-GCA_900067695.1-2016-11-09.one_line	11960690255	100	1	OST-DNA-lrzip	19.12	30084	602	0.3792	3.6228
DNA-Genome-Picea-abies-GCA_900067695.1-2016-11-09.one_line	11960690255	125	1	OST-DNA-lrzip	18.82	28883	538	0.3949	3.9902
DNA-Genome-Picea-abies-GCA_900067695.1-2016-11-09.one_line	11960690255	150	1	OST-DNA-lrzip	18.62	28139	468	0.4054	4.5383
DNA-Genome-Picea-abies-GCA_900067695.1-2016-11-09.one_line	11960690255	250	1	OST-DNA-lrzip	18.24	27171	393	0.4198	5.2941
DNA-Genome-Picea-abies-GCA_900067695.1-2016-11-09.one_line	11960690255	500	1	OST-DNA-lrzip	18.01	26268	343	0.4342	5.9893
DNA-Genome-Picea-abies-GCA_900067695.1-2016-11-09.one_line	11960690255	750	1	OST-DNA-lrzip	17.97	24694	319	0.4619	6.4256
DNA-Genome-Picea-abies-GCA_900067695.1-2016-11-09.one_line	11960690255	1000	1	OST-DNA-lrzip	17.98	24789	317	0.4601	6.4697
DNA-Genome-Picea-abies-GCA_900067695.1-2016-11-09.one_line	11960690255	2500	1	OST-DNA-lrzip	18.04	26067	295	0.4376	6.9754
DNA-Genome-Picea-abies-GCA_900067695.1-2016-11-09.one_line	11960690255	5000	1	OST-DNA-lrzip	18.11	25784	421	0.4424	4.9067
DNA-Genome-Picea-abies-GCA_900067695.1-2016-11-09.one_line	11960690255	10000	1	OST-DNA-lrzip	18.15	26191	287	0.4355	7.2136
DNA-Genome-Picea-abies-GCA_900067695.1-2016-11-09.one_line	11960690255	25	2	OST-DNA-lrzip	23.33	42527	12555	0.2682	0.212
DNA-Genome-Picea-abies-GCA_900067695.1-2016-11-09.one_line	11960690255	50	2	OST-DNA-lrzip	20.74	34334	2564	0.3322	0.9227
DNA-Genome-Picea-abies-GCA_900067695.1-2016-11-09.one_line	11960690255	100	2	OST-DNA-lrzip	19.09	29733	667	0.3836	3.2646
DNA-Genome-Picea-abies-GCA_900067695.1-2016-11-09.one_line	11960690255	125	2	OST-DNA-lrzip	18.76	28705	576	0.3974	3.7151
DNA-Genome-Picea-abies-GCA_900067695.1-2016-11-09.one_line	11960690255	150	2	OST-DNA-lrzip	18.55	28044	493	0.4067	4.2919
DNA-Genome-Picea-abies-GCA_900067695.1-2016-11-09.one_line	11960690255	250	2	OST-DNA-lrzip	18.17	26832	396	0.4251	5.2338
DNA-Genome-Picea-abies-GCA_900067695.1-2016-11-09.one_line	11960690255	500	2	OST-DNA-lrzip	17.97	26132	341	0.4365	6.011
DNA-Genome-Picea-abies-GCA_900067695.1-2016-11-09.one_line	11960690255	750	2	OST-DNA-lrzip	17.95	24608	382	0.4635	5.3599
DNA-Genome-Picea-abies-GCA_900067695.1-2016-11-09.one_line	11960690255	1000	2	OST-DNA-lrzip	17.97	24851	311	0.459	6.5909
DNA-Genome-Picea-abies-GCA_900067695.1-2016-11-09.one_line	11960690255	2500	2	OST-DNA-lrzip	18.05	25638	301	0.4449	6.8402
DNA-Genome-Picea-abies-GCA_900067695.1-2016-11-09.one_line	11960690255	5000	2	OST-DNA-lrzip	18.12	25875	388	0.4408	5.327
DNA-Genome-Picea-abies-GCA_900067695.1-2016-11-09.one_line	11960690255	10000	2	OST-DNA-lrzip	18.17	25896	352	0.4405	5.888
DNA-Genome-Picea-abies-GCA_900067695.1-2016-11-09.one_line	11960690255	25	3	OST-DNA-lrzip	23.37	42529	14346	0.2682	0.1858
DNA-Genome-Picea-abies-GCA_900067695.1-2016-11-09.one_line	11960690255	50	3	OST-DNA-lrzip	20.74	34633	2592	0.3294	0.9127
DNA-Genome-Picea-abies-GCA_900067695.1-2016-11-09.one_line	11960690255	100	3	OST-DNA-lrzip	19.09	30010	665	0.3801	3.2745
DNA-Genome-Picea-abies-GCA_900067695.1-2016-11-09.one_line	11960690255	125	3	OST-DNA-lrzip	18.77	28915	580	0.3945	3.6914
DNA-Genome-Picea-abies-GCA_900067695.1-2016-11-09.one_line	11960690255	150	3	OST-DNA-lrzip	18.55	28250	494	0.4038	4.2832
DNA-Genome-Picea-abies-GCA_900067695.1-2016-11-09.one_line	11960690255	250	3	OST-DNA-lrzip	18.17	27029	400	0.422	5.1814
DNA-Genome-Picea-abies-GCA_900067695.1-2016-11-09.one_line	11960690255	500	3	OST-DNA-lrzip	17.98	26147	345	0.4362	5.9447
DNA-Genome-Picea-abies-GCA_900067695.1-2016-11-09.one_line	11960690255	750	3	OST-DNA-lrzip	17.96	24547	367	0.4647	5.5821
DNA-Genome-Picea-abies-GCA_900067695.1-2016-11-09.one_line	11960690255	1000	3	OST-DNA-lrzip	17.98	24311	312	0.4692	6.5734
DNA-Genome-Picea-abies-GCA_900067695.1-2016-11-09.one_line	11960690255	2500	3	OST-DNA-lrzip	18.06	26509	290	0.4303	7.1036
DNA-Genome-Picea-abies-GCA_900067695.1-2016-11-09.one_line	11960690255	5000	3	OST-DNA-lrzip	18.13	25583	294	0.4459	7.0341
DNA-Genome-Picea-abies-GCA_900067695.1-2016-11-09.one_line	11960690255	10000	3	OST-DNA-lrzip	18.18	26504	280	0.4304	7.4061
DNA-Genome-Picea-abies-GCA_900067695.1-2016-11-09.one_line	11960690255	25	4	OST-DNA-lrzip	23.37	43428	14327	0.2627	0.1861
DNA-Genome-Picea-abies-GCA_900067695.1-2016-11-09.one_line	11960690255	50	4	OST-DNA-lrzip	20.74	34565	2718	0.33	0.8704
DNA-Genome-Picea-abies-GCA_900067695.1-2016-11-09.one_line	11960690255	100	4	OST-DNA-lrzip	19.1	30139	670	0.3785	3.2517
DNA-Genome-Picea-abies-GCA_900067695.1-2016-11-09.one_line	11960690255	125	4	OST-DNA-lrzip	18.77	28742	580	0.3969	3.6914
DNA-Genome-Picea-abies-GCA_900067695.1-2016-11-09.one_line	11960690255	150	4	OST-DNA-lrzip	18.56	28494	481	0.4003	4.4014
DNA-Genome-Picea-abies-GCA_900067695.1-2016-11-09.one_line	11960690255	250	4	OST-DNA-lrzip	18.19	27111	397	0.4207	5.2264
DNA-Genome-Picea-abies-GCA_900067695.1-2016-11-09.one_line	11960690255	500	4	OST-DNA-lrzip	18	26789	344	0.4258	5.9686
DNA-Genome-Picea-abies-GCA_900067695.1-2016-11-09.one_line	11960690255	750	4	OST-DNA-lrzip	17.98	24440	326	0.4667	6.2911
DNA-Genome-Picea-abies-GCA_900067695.1-2016-11-09.one_line	11960690255	1000	4	OST-DNA-lrzip	17.99	24717	307	0.4615	6.6842
DNA-Genome-Picea-abies-GCA_900067695.1-2016-11-09.one_line	11960690255	2500	4	OST-DNA-lrzip	18.08	26610	299	0.4287	6.8974
DNA-Genome-Picea-abies-GCA_900067695.1-2016-11-09.one_line	11960690255	5000	4	OST-DNA-lrzip	18.15	25634	295	0.445	7.018
DNA-Genome-Picea-abies-GCA_900067695.1-2016-11-09.one_line	11960690255	10000	4	OST-DNA-lrzip	18.2	25810	379	0.4419	5.4776
DNA-Genome-Picea-abies-GCA_900067695.1-2016-11-09.one_line	11960690255	25	5	OST-DNA-lrzip	23.37	43497	14343	0.2622	0.1859
DNA-Genome-Picea-abies-GCA_900067695.1-2016-11-09.one_line	11960690255	50	5	OST-DNA-lrzip	20.74	34625	2572	0.3294	0.9198
DNA-Genome-Picea-abies-GCA_900067695.1-2016-11-09.one_line	11960690255	100	5	OST-DNA-lrzip	19.1	29662	660	0.3846	3.301
DNA-Genome-Picea-abies-GCA_900067695.1-2016-11-09.one_line	11960690255	125	5	OST-DNA-lrzip	18.77	28869	582	0.3951	3.6787
DNA-Genome-Picea-abies-GCA_900067695.1-2016-11-09.one_line	11960690255	150	5	OST-DNA-lrzip	18.56	28051	492	0.4066	4.303
DNA-Genome-Picea-abies-GCA_900067695.1-2016-11-09.one_line	11960690255	250	5	OST-DNA-lrzip	18.19	27360	395	0.4169	5.2528
DNA-Genome-Picea-abies-GCA_900067695.1-2016-11-09.one_line	11960690255	500	5	OST-DNA-lrzip	18	26604	344	0.4288	5.9686
DNA-Genome-Picea-abies-GCA_900067695.1-2016-11-09.one_line	11960690255	750	5	OST-DNA-lrzip	17.98	24311	324	0.4692	6.33
DNA-Genome-Picea-abies-GCA_900067695.1-2016-11-09.one_line	11960690255	1000	5	OST-DNA-lrzip	17.99	24437	313	0.4668	6.5561
DNA-Genome-Picea-abies-GCA_900067695.1-2016-11-09.one_line	11960690255	2500	5	OST-DNA-lrzip	18.08	25621	301	0.4452	6.8515
DNA-Genome-Picea-abies-GCA_900067695.1-2016-11-09.one_line	11960690255	5000	5	OST-DNA-lrzip	18.15	26190	289	0.4355	7.1637
DNA-Genome-Picea-abies-GCA_900067695.1-2016-11-09.one_line	11960690255	10000	5	OST-DNA-lrzip	18.2	25768	295	0.4427	7.0373
DNA-Genome-Picea-abies-GCA_900067695.1-2016-11-09.one_line	11960690255	25	1	OST-DNA-lzip	24.3	37405	6594	0.3049	0.4204
DNA-Genome-Picea-abies-GCA_900067695.1-2016-11-09.one_line	11960690255	50	1	OST-DNA-lzip	22.62	29419	1485	0.3877	1.7375
DNA-Genome-Picea-abies-GCA_900067695.1-2016-11-09.one_line	11960690255	100	1	OST-DNA-lzip	21.53	26562	590	0.4294	4.1624
DNA-Genome-Picea-abies-GCA_900067695.1-2016-11-09.one_line	11960690255	125	1	OST-DNA-lzip	21.3	25579	524	0.4459	4.6367
DNA-Genome-Picea-abies-GCA_900067695.1-2016-11-09.one_line	11960690255	150	1	OST-DNA-lzip	21.16	25220	482	0.4523	5.0075
DNA-Genome-Picea-abies-GCA_900067695.1-2016-11-09.one_line	11960690255	250	1	OST-DNA-lzip	20.88	23871	407	0.4778	5.8518
DNA-Genome-Picea-abies-GCA_900067695.1-2016-11-09.one_line	11960690255	500	1	OST-DNA-lzip	20.75	22549	347	0.5059	6.821
DNA-Genome-Picea-abies-GCA_900067695.1-2016-11-09.one_line	11960690255	750	1	OST-DNA-lzip	20.75	23630	340	0.4827	6.9614
DNA-Genome-Picea-abies-GCA_900067695.1-2016-11-09.one_line	11960690255	1000	1	OST-DNA-lzip	20.76	23959	357	0.4761	6.6331
DNA-Genome-Picea-abies-GCA_900067695.1-2016-11-09.one_line	11960690255	2500	1	OST-DNA-lzip	20.85	23453	299	0.4864	7.9541
DNA-Genome-Picea-abies-GCA_900067695.1-2016-11-09.one_line	11960690255	5000	1	OST-DNA-lzip	20.93	23148	304	0.4928	7.8533
DNA-Genome-Picea-abies-GCA_900067695.1-2016-11-09.one_line	11960690255	10000	1	OST-DNA-lzip	20.98	22948	310	0.4971	7.7197
DNA-Genome-Picea-abies-GCA_900067695.1-2016-11-09.one_line	11960690255	25	2	OST-DNA-lzip	24.63	36701	11217	0.3108	0.2505
DNA-Genome-Picea-abies-GCA_900067695.1-2016-11-09.one_line	11960690255	50	2	OST-DNA-lzip	22.69	29898	2394	0.3815	1.0811
DNA-Genome-Picea-abies-GCA_900067695.1-2016-11-09.one_line	11960690255	100	2	OST-DNA-lzip	21.44	26704	658	0.4271	3.7167
DNA-Genome-Picea-abies-GCA_900067695.1-2016-11-09.one_line	11960690255	125	2	OST-DNA-lzip	21.19	25543	548	0.4466	4.4107
DNA-Genome-Picea-abies-GCA_900067695.1-2016-11-09.one_line	11960690255	150	2	OST-DNA-lzip	21.04	25379	515	0.4495	4.6601
DNA-Genome-Picea-abies-GCA_900067695.1-2016-11-09.one_line	11960690255	250	2	OST-DNA-lzip	20.77	23928	413	0.4767	5.7364
DNA-Genome-Picea-abies-GCA_900067695.1-2016-11-09.one_line	11960690255	500	2	OST-DNA-lzip	20.68	22273	357	0.5121	6.6075
DNA-Genome-Picea-abies-GCA_900067695.1-2016-11-09.one_line	11960690255	750	2	OST-DNA-lzip	20.69	23776	376	0.4798	6.2767
DNA-Genome-Picea-abies-GCA_900067695.1-2016-11-09.one_line	11960690255	1000	2	OST-DNA-lzip	20.72	23432	332	0.4868	7.1188
DNA-Genome-Picea-abies-GCA_900067695.1-2016-11-09.one_line	11960690255	2500	2	OST-DNA-lzip	20.85	23428	298	0.4869	7.9808
DNA-Genome-Picea-abies-GCA_900067695.1-2016-11-09.one_line	11960690255	5000	2	OST-DNA-lzip	20.94	22997	306	0.496	7.8057
DNA-Genome-Picea-abies-GCA_900067695.1-2016-11-09.one_line	11960690255	10000	2	OST-DNA-lzip	20.99	23099	304	0.4938	7.8758
DNA-Genome-Picea-abies-GCA_900067695.1-2016-11-09.one_line	11960690255	25	3	OST-DNA-lzip	24.63	36702	13253	0.3108	0.212
DNA-Genome-Picea-abies-GCA_900067695.1-2016-11-09.one_line	11960690255	50	3	OST-DNA-lzip	22.68	30425	2430	0.3749	1.0646
DNA-Genome-Picea-abies-GCA_900067695.1-2016-11-09.one_line	11960690255	100	3	OST-DNA-lzip	21.44	26700	664	0.4272	3.6831
DNA-Genome-Picea-abies-GCA_900067695.1-2016-11-09.one_line	11960690255	125	3	OST-DNA-lzip	21.19	25605	559	0.4455	4.3239
DNA-Genome-Picea-abies-GCA_900067695.1-2016-11-09.one_line	11960690255	150	3	OST-DNA-lzip	21.04	24999	530	0.4563	4.5282
DNA-Genome-Picea-abies-GCA_900067695.1-2016-11-09.one_line	11960690255	250	3	OST-DNA-lzip	20.77	24087	415	0.4736	5.7088
DNA-Genome-Picea-abies-GCA_900067695.1-2016-11-09.one_line	11960690255	500	3	OST-DNA-lzip	20.68	22811	353	0.5	6.6824
DNA-Genome-Picea-abies-GCA_900067695.1-2016-11-09.one_line	11960690255	750	3	OST-DNA-lzip	20.69	24026	360	0.4748	6.5556
DNA-Genome-Picea-abies-GCA_900067695.1-2016-11-09.one_line	11960690255	1000	3	OST-DNA-lzip	20.72	23367	367	0.4882	6.4399
DNA-Genome-Picea-abies-GCA_900067695.1-2016-11-09.one_line	11960690255	2500	3	OST-DNA-lzip	20.85	23265	318	0.4903	7.4789
DNA-Genome-Picea-abies-GCA_900067695.1-2016-11-09.one_line	11960690255	5000	3	OST-DNA-lzip	20.94	23226	615	0.4911	3.8838
DNA-Genome-Picea-abies-GCA_900067695.1-2016-11-09.one_line	11960690255	10000	3	OST-DNA-lzip	20.99	23462	302	0.4862	7.928
DNA-Genome-Picea-abies-GCA_900067695.1-2016-11-09.one_line	11960690255	25	4	OST-DNA-lzip	24.63	37402	13425	0.305	0.2093
DNA-Genome-Picea-abies-GCA_900067695.1-2016-11-09.one_line	11960690255	50	4	OST-DNA-lzip	22.69	30878	2425	0.3694	1.0673
DNA-Genome-Picea-abies-GCA_900067695.1-2016-11-09.one_line	11960690255	100	4	OST-DNA-lzip	21.44	26739	656	0.4266	3.728
DNA-Genome-Picea-abies-GCA_900067695.1-2016-11-09.one_line	11960690255	125	4	OST-DNA-lzip	21.2	26086	563	0.4373	4.2952
DNA-Genome-Picea-abies-GCA_900067695.1-2016-11-09.one_line	11960690255	150	4	OST-DNA-lzip	21.04	25198	510	0.4527	4.7058
DNA-Genome-Picea-abies-GCA_900067695.1-2016-11-09.one_line	11960690255	250	4	OST-DNA-lzip	20.78	24020	426	0.4749	5.5641
DNA-Genome-Picea-abies-GCA_900067695.1-2016-11-09.one_line	11960690255	500	4	OST-DNA-lzip	20.69	22684	352	0.5028	6.7046
DNA-Genome-Picea-abies-GCA_900067695.1-2016-11-09.one_line	11960690255	750	4	OST-DNA-lzip	20.7	23906	359	0.4771	6.5771
DNA-Genome-Picea-abies-GCA_900067695.1-2016-11-09.one_line	11960690255	1000	4	OST-DNA-lzip	20.73	23363	358	0.4882	6.605
DNA-Genome-Picea-abies-GCA_900067695.1-2016-11-09.one_line	11960690255	2500	4	OST-DNA-lzip	20.86	22831	611	0.4996	3.8943
DNA-Genome-Picea-abies-GCA_900067695.1-2016-11-09.one_line	11960690255	5000	4	OST-DNA-lzip	20.95	23402	306	0.4874	7.8094
DNA-Genome-Picea-abies-GCA_900067695.1-2016-11-09.one_line	11960690255	10000	4	OST-DNA-lzip	21	23067	307	0.4945	7.8026
DNA-Genome-Picea-abies-GCA_900067695.1-2016-11-09.one_line	11960690255	25	5	OST-DNA-lzip	24.63	37419	13251	0.3048	0.212
DNA-Genome-Picea-abies-GCA_900067695.1-2016-11-09.one_line	11960690255	50	5	OST-DNA-lzip	22.69	30490	2409	0.3741	1.0744
DNA-Genome-Picea-abies-GCA_900067695.1-2016-11-09.one_line	11960690255	100	5	OST-DNA-lzip	21.44	26663	654	0.4278	3.7394
DNA-Genome-Picea-abies-GCA_900067695.1-2016-11-09.one_line	11960690255	125	5	OST-DNA-lzip	21.2	25894	559	0.4405	4.3259
DNA-Genome-Picea-abies-GCA_900067695.1-2016-11-09.one_line	11960690255	150	5	OST-DNA-lzip	21.04	25198	515	0.4527	4.6601
DNA-Genome-Picea-abies-GCA_900067695.1-2016-11-09.one_line	11960690255	250	5	OST-DNA-lzip	20.78	24042	426	0.4744	5.5641
DNA-Genome-Picea-abies-GCA_900067695.1-2016-11-09.one_line	11960690255	500	5	OST-DNA-lzip	20.69	22645	352	0.5037	6.7046
DNA-Genome-Picea-abies-GCA_900067695.1-2016-11-09.one_line	11960690255	750	5	OST-DNA-lzip	20.7	23608	311	0.4832	7.5922
DNA-Genome-Picea-abies-GCA_900067695.1-2016-11-09.one_line	11960690255	1000	5	OST-DNA-lzip	20.73	23538	347	0.4846	6.8144
DNA-Genome-Picea-abies-GCA_900067695.1-2016-11-09.one_line	11960690255	2500	5	OST-DNA-lzip	20.86	23530	307	0.4848	7.7505
DNA-Genome-Picea-abies-GCA_900067695.1-2016-11-09.one_line	11960690255	5000	5	OST-DNA-lzip	20.95	23258	456	0.4904	5.2405
DNA-Genome-Picea-abies-GCA_900067695.1-2016-11-09.one_line	11960690255	10000	5	OST-DNA-lzip	21	22960	310	0.4968	7.7271
DNA-Genome-Picea-abies-GCA_900067695.1-2016-11-09.one_line	11960690255	25	1	OST-DNA-xz	24.33	36906	6391	0.3091	0.4342
DNA-Genome-Picea-abies-GCA_900067695.1-2016-11-09.one_line	11960690255	50	1	OST-DNA-xz	22.65	26527	1416	0.43	1.8246
DNA-Genome-Picea-abies-GCA_900067695.1-2016-11-09.one_line	11960690255	100	1	OST-DNA-xz	21.55	26234	608	0.4348	4.043
DNA-Genome-Picea-abies-GCA_900067695.1-2016-11-09.one_line	11960690255	125	1	OST-DNA-xz	21.32	25388	494	0.4493	4.9228
DNA-Genome-Picea-abies-GCA_900067695.1-2016-11-09.one_line	11960690255	150	1	OST-DNA-xz	21.17	24880	451	0.4585	5.3543
DNA-Genome-Picea-abies-GCA_900067695.1-2016-11-09.one_line	11960690255	250	1	OST-DNA-xz	20.9	23707	370	0.4811	6.4432
DNA-Genome-Picea-abies-GCA_900067695.1-2016-11-09.one_line	11960690255	500	1	OST-DNA-xz	20.77	22680	318	0.5029	7.4502
DNA-Genome-Picea-abies-GCA_900067695.1-2016-11-09.one_line	11960690255	750	1	OST-DNA-xz	20.77	23907	276	0.4771	8.5839
DNA-Genome-Picea-abies-GCA_900067695.1-2016-11-09.one_line	11960690255	1000	1	OST-DNA-xz	20.78	22544	493	0.506	4.8079
DNA-Genome-Picea-abies-GCA_900067695.1-2016-11-09.one_line	11960690255	2500	1	OST-DNA-xz	20.88	22208	461	0.5136	5.1664
DNA-Genome-Picea-abies-GCA_900067695.1-2016-11-09.one_line	11960690255	5000	1	OST-DNA-xz	20.96	21957	495	0.5195	4.8299
DNA-Genome-Picea-abies-GCA_900067695.1-2016-11-09.one_line	11960690255	10000	1	OST-DNA-xz	21.01	21814	277	0.5229	8.6517
DNA-Genome-Picea-abies-GCA_900067695.1-2016-11-09.one_line	11960690255	25	2	OST-DNA-xz	24.67	35084	12315	0.3251	0.2285
DNA-Genome-Picea-abies-GCA_900067695.1-2016-11-09.one_line	11960690255	50	2	OST-DNA-xz	22.72	26742	2227	0.4265	1.1637
DNA-Genome-Picea-abies-GCA_900067695.1-2016-11-09.one_line	11960690255	100	2	OST-DNA-xz	21.45	26412	652	0.4319	3.7526
DNA-Genome-Picea-abies-GCA_900067695.1-2016-11-09.one_line	11960690255	125	2	OST-DNA-xz	21.2	25710	532	0.4437	4.5455
DNA-Genome-Picea-abies-GCA_900067695.1-2016-11-09.one_line	11960690255	150	2	OST-DNA-xz	21.05	24878	475	0.4585	5.0549
DNA-Genome-Picea-abies-GCA_900067695.1-2016-11-09.one_line	11960690255	250	2	OST-DNA-xz	20.78	23844	379	0.4784	6.2541
DNA-Genome-Picea-abies-GCA_900067695.1-2016-11-09.one_line	11960690255	500	2	OST-DNA-xz	20.69	22701	320	0.5025	7.3751
DNA-Genome-Picea-abies-GCA_900067695.1-2016-11-09.one_line	11960690255	750	2	OST-DNA-xz	20.71	23149	306	0.4927	7.72
DNA-Genome-Picea-abies-GCA_900067695.1-2016-11-09.one_line	11960690255	1000	2	OST-DNA-xz	20.74	23077	296	0.4943	7.9923
DNA-Genome-Picea-abies-GCA_900067695.1-2016-11-09.one_line	11960690255	2500	2	OST-DNA-xz	20.88	22790	376	0.5005	6.3343
DNA-Genome-Picea-abies-GCA_900067695.1-2016-11-09.one_line	11960690255	5000	2	OST-DNA-xz	20.97	22463	536	0.5078	4.4626
DNA-Genome-Picea-abies-GCA_900067695.1-2016-11-09.one_line	11960690255	10000	2	OST-DNA-xz	21.02	21954	497	0.5196	4.8243
DNA-Genome-Picea-abies-GCA_900067695.1-2016-11-09.one_line	11960690255	25	3	OST-DNA-xz	24.67	37289	14398	0.3059	0.1954
DNA-Genome-Picea-abies-GCA_900067695.1-2016-11-09.one_line	11960690255	50	3	OST-DNA-xz	22.71	27104	2354	0.4208	1.1004
DNA-Genome-Picea-abies-GCA_900067695.1-2016-11-09.one_line	11960690255	100	3	OST-DNA-xz	21.45	26785	634	0.4259	3.8592
DNA-Genome-Picea-abies-GCA_900067695.1-2016-11-09.one_line	11960690255	125	3	OST-DNA-xz	21.2	25715	563	0.4436	4.2952
DNA-Genome-Picea-abies-GCA_900067695.1-2016-11-09.one_line	11960690255	150	3	OST-DNA-xz	21.05	25134	488	0.4538	4.9203
DNA-Genome-Picea-abies-GCA_900067695.1-2016-11-09.one_line	11960690255	250	3	OST-DNA-xz	20.78	23777	384	0.4797	6.1726
DNA-Genome-Picea-abies-GCA_900067695.1-2016-11-09.one_line	11960690255	500	3	OST-DNA-xz	20.7	22795	325	0.5004	7.2651
DNA-Genome-Picea-abies-GCA_900067695.1-2016-11-09.one_line	11960690255	750	3	OST-DNA-xz	20.72	23283	319	0.4899	7.4089
DNA-Genome-Picea-abies-GCA_900067695.1-2016-11-09.one_line	11960690255	1000	3	OST-DNA-xz	20.75	23269	278	0.4902	8.5139
DNA-Genome-Picea-abies-GCA_900067695.1-2016-11-09.one_line	11960690255	2500	3	OST-DNA-xz	20.88	22111	504	0.5159	4.7256
DNA-Genome-Picea-abies-GCA_900067695.1-2016-11-09.one_line	11960690255	5000	3	OST-DNA-xz	20.97	22227	550	0.5132	4.349
DNA-Genome-Picea-abies-GCA_900067695.1-2016-11-09.one_line	11960690255	10000	3	OST-DNA-xz	21.02	21872	284	0.5215	8.4425
DNA-Genome-Picea-abies-GCA_900067695.1-2016-11-09.one_line	11960690255	25	4	OST-DNA-xz	24.67	38307	14233	0.2978	0.1977
DNA-Genome-Picea-abies-GCA_900067695.1-2016-11-09.one_line	11960690255	50	4	OST-DNA-xz	22.72	27935	2377	0.4083	1.0903
DNA-Genome-Picea-abies-GCA_900067695.1-2016-11-09.one_line	11960690255	100	4	OST-DNA-xz	21.45	27006	636	0.4224	3.847
DNA-Genome-Picea-abies-GCA_900067695.1-2016-11-09.one_line	11960690255	125	4	OST-DNA-xz	21.21	26100	526	0.437	4.5995
DNA-Genome-Picea-abies-GCA_900067695.1-2016-11-09.one_line	11960690255	150	4	OST-DNA-xz	21.05	25293	498	0.451	4.8215
DNA-Genome-Picea-abies-GCA_900067695.1-2016-11-09.one_line	11960690255	250	4	OST-DNA-xz	20.79	24089	379	0.4735	6.2571
DNA-Genome-Picea-abies-GCA_900067695.1-2016-11-09.one_line	11960690255	500	4	OST-DNA-xz	20.7	22958	321	0.4968	7.3557
DNA-Genome-Picea-abies-GCA_900067695.1-2016-11-09.one_line	11960690255	750	4	OST-DNA-xz	20.72	23378	341	0.4879	6.9309
DNA-Genome-Picea-abies-GCA_900067695.1-2016-11-09.one_line	11960690255	1000	4	OST-DNA-xz	20.75	23303	285	0.4895	8.3048
DNA-Genome-Picea-abies-GCA_900067695.1-2016-11-09.one_line	11960690255	2500	4	OST-DNA-xz	20.89	23004	292	0.4959	8.1604
DNA-Genome-Picea-abies-GCA_900067695.1-2016-11-09.one_line	11960690255	5000	4	OST-DNA-xz	20.98	21978	519	0.519	4.611
DNA-Genome-Picea-abies-GCA_900067695.1-2016-11-09.one_line	11960690255	10000	4	OST-DNA-xz	21.04	21855	281	0.5219	8.5407
DNA-Genome-Picea-abies-GCA_900067695.1-2016-11-09.one_line	11960690255	25	5	OST-DNA-xz	24.67	37122	14085	0.3073	0.1998
DNA-Genome-Picea-abies-GCA_900067695.1-2016-11-09.one_line	11960690255	50	5	OST-DNA-xz	22.72	28447	2358	0.401	1.0991
DNA-Genome-Picea-abies-GCA_900067695.1-2016-11-09.one_line	11960690255	100	5	OST-DNA-xz	21.45	26807	640	0.4255	3.823
DNA-Genome-Picea-abies-GCA_900067695.1-2016-11-09.one_line	11960690255	125	5	OST-DNA-xz	21.21	25970	535	0.4392	4.5221
DNA-Genome-Picea-abies-GCA_900067695.1-2016-11-09.one_line	11960690255	150	5	OST-DNA-xz	21.05	25575	478	0.446	5.0232
DNA-Genome-Picea-abies-GCA_900067695.1-2016-11-09.one_line	11960690255	250	5	OST-DNA-xz	20.79	23939	385	0.4765	6.1596
DNA-Genome-Picea-abies-GCA_900067695.1-2016-11-09.one_line	11960690255	500	5	OST-DNA-xz	20.7	22632	323	0.504	7.3101
DNA-Genome-Picea-abies-GCA_900067695.1-2016-11-09.one_line	11960690255	750	5	OST-DNA-xz	20.72	23350	309	0.4885	7.6487
DNA-Genome-Picea-abies-GCA_900067695.1-2016-11-09.one_line	11960690255	1000	5	OST-DNA-xz	20.75	23301	295	0.4895	8.0233
DNA-Genome-Picea-abies-GCA_900067695.1-2016-11-09.one_line	11960690255	2500	5	OST-DNA-xz	20.89	22098	471	0.5162	5.0591
DNA-Genome-Picea-abies-GCA_900067695.1-2016-11-09.one_line	11960690255	5000	5	OST-DNA-xz	20.98	22141	471	0.5152	5.0809
DNA-Genome-Picea-abies-GCA_900067695.1-2016-11-09.one_line	11960690255	10000	5	OST-DNA-xz	21.04	21859	287	0.5218	8.3622
DNA-Helicobacter-2019-04-24.one_line	2711601413	25	1	OST-DNA-bcm	19.03	5019	929	0.5152	0.5297
DNA-Helicobacter-2019-04-24.one_line	2711601413	50	1	OST-DNA-bcm	16.74	3242	703	0.7977	0.6158
DNA-Helicobacter-2019-04-24.one_line	2711601413	100	1	OST-DNA-bcm	15.46	1969	670	1.3133	0.5967
DNA-Helicobacter-2019-04-24.one_line	2711601413	125	1	OST-DNA-bcm	15.22	1763	651	1.4668	0.6046
DNA-Helicobacter-2019-04-24.one_line	2711601413	150	1	OST-DNA-bcm	15.08	1643	662	1.5739	0.5891
DNA-Helicobacter-2019-04-24.one_line	2711601413	250	1	OST-DNA-bcm	14.93	1336	637	1.9356	0.6061
DNA-Helicobacter-2019-04-24.one_line	2711601413	500	1	OST-DNA-bcm	14.87	1318	641	1.9621	0.5999
DNA-Helicobacter-2019-04-24.one_line	2711601413	750	1	OST-DNA-bcm	14.99	1309	648	1.9755	0.5982
DNA-Helicobacter-2019-04-24.one_line	2711601413	1000	1	OST-DNA-bcm	15.14	1230	658	2.1024	0.595
DNA-Helicobacter-2019-04-24.one_line	2711601413	2500	1	OST-DNA-bcm	15.56	1169	674	2.2121	0.597
DNA-Helicobacter-2019-04-24.one_line	2711601413	5000	1	OST-DNA-bcm	15.79	1140	668	2.2684	0.6113
DNA-Helicobacter-2019-04-24.one_line	2711601413	10000	1	OST-DNA-bcm	15.96	1118	682	2.313	0.6052
DNA-Helicobacter-2019-04-24.one_line	2711601413	25	2	OST-DNA-bcm	19.1	5147	1052	0.5024	0.4695
DNA-Helicobacter-2019-04-24.one_line	2711601413	50	2	OST-DNA-bcm	16.51	3063	779	0.8443	0.5481
DNA-Helicobacter-2019-04-24.one_line	2711601413	100	2	OST-DNA-bcm	15.19	1923	635	1.3448	0.6186
DNA-Helicobacter-2019-04-24.one_line	2711601413	125	2	OST-DNA-bcm	14.99	1717	619	1.5061	0.6262
DNA-Helicobacter-2019-04-24.one_line	2711601413	150	2	OST-DNA-bcm	14.81	1607	630	1.6092	0.6079
DNA-Helicobacter-2019-04-24.one_line	2711601413	250	2	OST-DNA-bcm	14.73	1371	620	1.8862	0.6144
DNA-Helicobacter-2019-04-24.one_line	2711601413	500	2	OST-DNA-bcm	14.81	1137	612	2.2744	0.6258
DNA-Helicobacter-2019-04-24.one_line	2711601413	750	2	OST-DNA-bcm	14.93	1076	609	2.4033	0.634
DNA-Helicobacter-2019-04-24.one_line	2711601413	1000	2	OST-DNA-bcm	15.12	1043	612	2.4794	0.6389
DNA-Helicobacter-2019-04-24.one_line	2711601413	2500	2	OST-DNA-bcm	15.59	984	611	2.628	0.6598
DNA-Helicobacter-2019-04-24.one_line	2711601413	5000	2	OST-DNA-bcm	15.78	958	609	2.6994	0.6701
DNA-Helicobacter-2019-04-24.one_line	2711601413	10000	2	OST-DNA-bcm	16.06	925	612	2.7957	0.6786
DNA-Helicobacter-2019-04-24.one_line	2711601413	25	3	OST-DNA-bcm	19.08	5270	1088	0.4907	0.4535
DNA-Helicobacter-2019-04-24.one_line	2711601413	50	3	OST-DNA-bcm	16.51	3114	814	0.8304	0.5245
DNA-Helicobacter-2019-04-24.one_line	2711601413	100	3	OST-DNA-bcm	15.19	1949	640	1.3268	0.6138
DNA-Helicobacter-2019-04-24.one_line	2711601413	125	3	OST-DNA-bcm	14.99	1751	608	1.4769	0.6376
DNA-Helicobacter-2019-04-24.one_line	2711601413	150	3	OST-DNA-bcm	14.81	1589	620	1.6274	0.6177
DNA-Helicobacter-2019-04-24.one_line	2711601413	250	3	OST-DNA-bcm	14.73	1333	622	1.94	0.6124
DNA-Helicobacter-2019-04-24.one_line	2711601413	500	3	OST-DNA-bcm	14.81	1177	590	2.1971	0.6491
DNA-Helicobacter-2019-04-24.one_line	2711601413	750	3	OST-DNA-bcm	14.93	1063	584	2.4327	0.6611
DNA-Helicobacter-2019-04-24.one_line	2711601413	1000	3	OST-DNA-bcm	15.12	1030	599	2.5107	0.6528
DNA-Helicobacter-2019-04-24.one_line	2711601413	2500	3	OST-DNA-bcm	15.59	970	591	2.666	0.6822
DNA-Helicobacter-2019-04-24.one_line	2711601413	5000	3	OST-DNA-bcm	15.79	931	597	2.7776	0.684
DNA-Helicobacter-2019-04-24.one_line	2711601413	10000	3	OST-DNA-bcm	16.07	913	599	2.8324	0.6938
DNA-Helicobacter-2019-04-24.one_line	2711601413	25	4	OST-DNA-bcm	19.08	5135	1018	0.5036	0.4847
DNA-Helicobacter-2019-04-24.one_line	2711601413	50	4	OST-DNA-bcm	16.5	2953	669	0.8757	0.6378
DNA-Helicobacter-2019-04-24.one_line	2711601413	100	4	OST-DNA-bcm	15.18	2033	658	1.272	0.5966
DNA-Helicobacter-2019-04-24.one_line	2711601413	125	4	OST-DNA-bcm	14.98	1772	616	1.4594	0.6289
DNA-Helicobacter-2019-04-24.one_line	2711601413	150	4	OST-DNA-bcm	14.81	1609	637	1.6072	0.6012
DNA-Helicobacter-2019-04-24.one_line	2711601413	250	4	OST-DNA-bcm	14.71	1345	614	1.9227	0.6195
DNA-Helicobacter-2019-04-24.one_line	2711601413	500	4	OST-DNA-bcm	14.83	1137	604	2.2744	0.6349
DNA-Helicobacter-2019-04-24.one_line	2711601413	750	4	OST-DNA-bcm	14.96	1089	605	2.3746	0.6394
DNA-Helicobacter-2019-04-24.one_line	2711601413	1000	4	OST-DNA-bcm	15.09	1055	597	2.4512	0.6536
DNA-Helicobacter-2019-04-24.one_line	2711601413	2500	4	OST-DNA-bcm	15.54	989	597	2.6147	0.6731
DNA-Helicobacter-2019-04-24.one_line	2711601413	5000	4	OST-DNA-bcm	15.83	976	620	2.6496	0.6603
DNA-Helicobacter-2019-04-24.one_line	2711601413	10000	4	OST-DNA-bcm	16.04	953	604	2.7135	0.6867
DNA-Helicobacter-2019-04-24.one_line	2711601413	25	5	OST-DNA-bcm	19.08	5021	991	0.515	0.4979
DNA-Helicobacter-2019-04-24.one_line	2711601413	50	5	OST-DNA-bcm	16.5	2958	693	0.8742	0.6157
DNA-Helicobacter-2019-04-24.one_line	2711601413	100	5	OST-DNA-bcm	15.18	1987	622	1.3015	0.6311
DNA-Helicobacter-2019-04-24.one_line	2711601413	125	5	OST-DNA-bcm	14.98	1775	658	1.4569	0.5887
DNA-Helicobacter-2019-04-24.one_line	2711601413	150	5	OST-DNA-bcm	14.81	1647	613	1.5701	0.6248
DNA-Helicobacter-2019-04-24.one_line	2711601413	250	5	OST-DNA-bcm	14.71	1353	609	1.9113	0.6246
DNA-Helicobacter-2019-04-24.one_line	2711601413	500	5	OST-DNA-bcm	14.83	1149	608	2.2506	0.6308
DNA-Helicobacter-2019-04-24.one_line	2711601413	750	5	OST-DNA-bcm	14.96	1097	596	2.3573	0.6491
DNA-Helicobacter-2019-04-24.one_line	2711601413	1000	5	OST-DNA-bcm	15.09	1087	597	2.379	0.6536
DNA-Helicobacter-2019-04-24.one_line	2711601413	2500	5	OST-DNA-bcm	15.54	1027	604	2.518	0.6653
DNA-Helicobacter-2019-04-24.one_line	2711601413	5000	5	OST-DNA-bcm	15.83	997	607	2.5938	0.6744
DNA-Helicobacter-2019-04-24.one_line	2711601413	10000	5	OST-DNA-bcm	16.04	965	622	2.6798	0.6669
DNA-Helicobacter-2019-04-24.one_line	2711601413	25	1	OST-DNA-brotli	11.91	15899	341	0.1627	0.9032
DNA-Helicobacter-2019-04-24.one_line	2711601413	50	1	OST-DNA-brotli	9.2	14680	155	0.1762	1.5349
DNA-Helicobacter-2019-04-24.one_line	2711601413	100	1	OST-DNA-brotli	7.24	13634	79	0.1897	2.3699
DNA-Helicobacter-2019-04-24.one_line	2711601413	125	1	OST-DNA-brotli	6.8	12799	77	0.202	2.2837
DNA-Helicobacter-2019-04-24.one_line	2711601413	150	1	OST-DNA-brotli	6.5	12570	68	0.2057	2.4719
DNA-Helicobacter-2019-04-24.one_line	2711601413	250	1	OST-DNA-brotli	5.92	11969	48	0.2161	3.1894
DNA-Helicobacter-2019-04-24.one_line	2711601413	500	1	OST-DNA-brotli	5.45	11052	33	0.234	4.2708
DNA-Helicobacter-2019-04-24.one_line	2711601413	750	1	OST-DNA-brotli	5.3	11074	30	0.2335	4.5686
DNA-Helicobacter-2019-04-24.one_line	2711601413	1000	1	OST-DNA-brotli	5.24	10908	25	0.2371	5.4202
DNA-Helicobacter-2019-04-24.one_line	2711601413	2500	1	OST-DNA-brotli	5.19	10786	20	0.2398	6.7106
DNA-Helicobacter-2019-04-24.one_line	2711601413	5000	1	OST-DNA-brotli	5.21	10917	19	0.2369	7.091
DNA-Helicobacter-2019-04-24.one_line	2711601413	10000	1	OST-DNA-brotli	5.25	10825	18	0.2389	7.5425
DNA-Helicobacter-2019-04-24.one_line	2711601413	25	2	OST-DNA-brotli	12.87	14747	457	0.1754	0.7283
DNA-Helicobacter-2019-04-24.one_line	2711601413	50	2	OST-DNA-brotli	9.65	13643	179	0.1895	1.3941
DNA-Helicobacter-2019-04-24.one_line	2711601413	100	2	OST-DNA-brotli	7.41	12746	90	0.2029	2.1291
DNA-Helicobacter-2019-04-24.one_line	2711601413	125	2	OST-DNA-brotli	6.92	12380	71	0.2089	2.5204
DNA-Helicobacter-2019-04-24.one_line	2711601413	150	2	OST-DNA-brotli	6.59	12248	57	0.2111	2.9898
DNA-Helicobacter-2019-04-24.one_line	2711601413	250	2	OST-DNA-brotli	5.95	11714	42	0.2208	3.6635
DNA-Helicobacter-2019-04-24.one_line	2711601413	500	2	OST-DNA-brotli	5.47	11200	33	0.2309	4.2865
DNA-Helicobacter-2019-04-24.one_line	2711601413	750	2	OST-DNA-brotli	5.31	11118	25	0.2326	5.4926
DNA-Helicobacter-2019-04-24.one_line	2711601413	1000	2	OST-DNA-brotli	5.25	11005	23	0.235	5.9028
DNA-Helicobacter-2019-04-24.one_line	2711601413	2500	2	OST-DNA-brotli	5.21	10820	19	0.239	7.091
DNA-Helicobacter-2019-04-24.one_line	2711601413	5000	2	OST-DNA-brotli	5.26	10787	17	0.2397	8.0013
DNA-Helicobacter-2019-04-24.one_line	2711601413	10000	2	OST-DNA-brotli	5.33	11008	17	0.2349	8.1078
DNA-Helicobacter-2019-04-24.one_line	2711601413	25	3	OST-DNA-brotli	12.98	14983	514	0.1726	0.653
DNA-Helicobacter-2019-04-24.one_line	2711601413	50	3	OST-DNA-brotli	9.64	13073	182	0.1978	1.3697
DNA-Helicobacter-2019-04-24.one_line	2711601413	100	3	OST-DNA-brotli	7.4	12302	84	0.2102	2.2781
DNA-Helicobacter-2019-04-24.one_line	2711601413	125	3	OST-DNA-brotli	6.91	11868	67	0.2179	2.667
DNA-Helicobacter-2019-04-24.one_line	2711601413	150	3	OST-DNA-brotli	6.59	11720	59	0.2206	2.8884
DNA-Helicobacter-2019-04-24.one_line	2711601413	250	3	OST-DNA-brotli	5.94	11267	40	0.2295	3.8402
DNA-Helicobacter-2019-04-24.one_line	2711601413	500	3	OST-DNA-brotli	5.47	10769	28	0.2401	5.0519
DNA-Helicobacter-2019-04-24.one_line	2711601413	750	3	OST-DNA-brotli	5.31	10641	25	0.243	5.4926
DNA-Helicobacter-2019-04-24.one_line	2711601413	1000	3	OST-DNA-brotli	5.25	10653	23	0.2427	5.9028
DNA-Helicobacter-2019-04-24.one_line	2711601413	2500	3	OST-DNA-brotli	5.21	10508	19	0.2461	7.091
DNA-Helicobacter-2019-04-24.one_line	2711601413	5000	3	OST-DNA-brotli	5.27	10506	18	0.2461	7.5712
DNA-Helicobacter-2019-04-24.one_line	2711601413	10000	3	OST-DNA-brotli	5.34	10490	17	0.2465	8.123
DNA-Helicobacter-2019-04-24.one_line	2711601413	25	4	OST-DNA-brotli	12.72	14885	495	0.1737	0.6645
DNA-Helicobacter-2019-04-24.one_line	2711601413	50	4	OST-DNA-brotli	9.41	13138	180	0.1968	1.3519
DNA-Helicobacter-2019-04-24.one_line	2711601413	100	4	OST-DNA-brotli	7.21	11659	83	0.2218	2.2464
DNA-Helicobacter-2019-04-24.one_line	2711601413	125	4	OST-DNA-brotli	6.72	11339	70	0.2281	2.4825
DNA-Helicobacter-2019-04-24.one_line	2711601413	150	4	OST-DNA-brotli	6.41	11112	58	0.2327	2.858
DNA-Helicobacter-2019-04-24.one_line	2711601413	250	4	OST-DNA-brotli	5.79	10482	41	0.2467	3.6519
DNA-Helicobacter-2019-04-24.one_line	2711601413	500	4	OST-DNA-brotli	5.32	9831	29	0.263	4.7439
DNA-Helicobacter-2019-04-24.one_line	2711601413	750	4	OST-DNA-brotli	5.18	9748	26	0.2653	5.1521
DNA-Helicobacter-2019-04-24.one_line	2711601413	1000	4	OST-DNA-brotli	5.12	9745	23	0.2654	5.7566
DNA-Helicobacter-2019-04-24.one_line	2711601413	2500	4	OST-DNA-brotli	5.12	9669	20	0.2675	6.6201
DNA-Helicobacter-2019-04-24.one_line	2711601413	5000	4	OST-DNA-brotli	5.2	9587	19	0.2697	7.0774
DNA-Helicobacter-2019-04-24.one_line	2711601413	10000	4	OST-DNA-brotli	5.32	9773	19	0.2646	7.2408
DNA-Helicobacter-2019-04-24.one_line	2711601413	25	5	OST-DNA-brotli	12.72	14897	501	0.1736	0.6566
DNA-Helicobacter-2019-04-24.one_line	2711601413	50	5	OST-DNA-brotli	9.41	13118	181	0.1971	1.3444
DNA-Helicobacter-2019-04-24.one_line	2711601413	100	5	OST-DNA-brotli	7.21	11805	82	0.2191	2.2738
DNA-Helicobacter-2019-04-24.one_line	2711601413	125	5	OST-DNA-brotli	6.72	11383	69	0.2272	2.5185
DNA-Helicobacter-2019-04-24.one_line	2711601413	150	5	OST-DNA-brotli	6.41	11271	59	0.2294	2.8095
DNA-Helicobacter-2019-04-24.one_line	2711601413	250	5	OST-DNA-brotli	5.79	10547	44	0.2452	3.4029
DNA-Helicobacter-2019-04-24.one_line	2711601413	500	5	OST-DNA-brotli	5.32	10032	29	0.2578	4.7439
DNA-Helicobacter-2019-04-24.one_line	2711601413	750	5	OST-DNA-brotli	5.18	9779	26	0.2644	5.1521
DNA-Helicobacter-2019-04-24.one_line	2711601413	1000	5	OST-DNA-brotli	5.12	9711	24	0.2663	5.5168
DNA-Helicobacter-2019-04-24.one_line	2711601413	2500	5	OST-DNA-brotli	5.12	9647	20	0.2681	6.6201
DNA-Helicobacter-2019-04-24.one_line	2711601413	5000	5	OST-DNA-brotli	5.2	9737	19	0.2656	7.0774
DNA-Helicobacter-2019-04-24.one_line	2711601413	10000	5	OST-DNA-brotli	5.32	9632	19	0.2685	7.2408
DNA-Helicobacter-2019-04-24.one_line	2711601413	25	1	OST-DNA-bsc	17.77	4708	556	0.5493	0.8265
DNA-Helicobacter-2019-04-24.one_line	2711601413	50	1	OST-DNA-bsc	15.05	2837	377	0.9115	1.0323
DNA-Helicobacter-2019-04-24.one_line	2711601413	100	1	OST-DNA-bsc	13.52	1798	303	1.4383	1.1539
DNA-Helicobacter-2019-04-24.one_line	2711601413	125	1	OST-DNA-bsc	13.22	1749	300	1.4786	1.1396
DNA-Helicobacter-2019-04-24.one_line	2711601413	150	1	OST-DNA-bsc	13.1	1719	283	1.5044	1.197
DNA-Helicobacter-2019-04-24.one_line	2711601413	250	1	OST-DNA-bsc	12.8	1461	293	1.77	1.1297
DNA-Helicobacter-2019-04-24.one_line	2711601413	500	1	OST-DNA-bsc	12.66	1182	272	2.1878	1.2036
DNA-Helicobacter-2019-04-24.one_line	2711601413	750	1	OST-DNA-bsc	12.72	1045	282	2.4746	1.1664
DNA-Helicobacter-2019-04-24.one_line	2711601413	1000	1	OST-DNA-bsc	12.78	1050	268	2.4628	1.2332
DNA-Helicobacter-2019-04-24.one_line	2711601413	2500	1	OST-DNA-bsc	13.11	946	266	2.7336	1.2745
DNA-Helicobacter-2019-04-24.one_line	2711601413	5000	1	OST-DNA-bsc	13.33	920	266	2.8109	1.2959
DNA-Helicobacter-2019-04-24.one_line	2711601413	10000	1	OST-DNA-bsc	13.48	938	265	2.7569	1.3154
DNA-Helicobacter-2019-04-24.one_line	2711601413	25	2	OST-DNA-bsc	18	5089	761	0.5082	0.6117
DNA-Helicobacter-2019-04-24.one_line	2711601413	50	2	OST-DNA-bsc	15.04	2790	398	0.9269	0.9772
DNA-Helicobacter-2019-04-24.one_line	2711601413	100	2	OST-DNA-bsc	13.36	1794	304	1.4415	1.1365
DNA-Helicobacter-2019-04-24.one_line	2711601413	125	2	OST-DNA-bsc	13.05	1589	288	1.6274	1.1718
DNA-Helicobacter-2019-04-24.one_line	2711601413	150	2	OST-DNA-bsc	12.91	1471	287	1.758	1.1632
DNA-Helicobacter-2019-04-24.one_line	2711601413	250	2	OST-DNA-bsc	12.65	1199	266	2.1568	1.2298
DNA-Helicobacter-2019-04-24.one_line	2711601413	500	2	OST-DNA-bsc	12.61	979	254	2.6415	1.2838
DNA-Helicobacter-2019-04-24.one_line	2711601413	750	2	OST-DNA-bsc	12.73	905	255	2.8574	1.291
DNA-Helicobacter-2019-04-24.one_line	2711601413	1000	2	OST-DNA-bsc	12.74	871	252	2.969	1.3074
DNA-Helicobacter-2019-04-24.one_line	2711601413	2500	2	OST-DNA-bsc	13.07	806	249	3.2084	1.3574
DNA-Helicobacter-2019-04-24.one_line	2711601413	5000	2	OST-DNA-bsc	13.27	770	249	3.3584	1.3782
DNA-Helicobacter-2019-04-24.one_line	2711601413	10000	2	OST-DNA-bsc	13.57	794	242	3.2569	1.4501
DNA-Helicobacter-2019-04-24.one_line	2711601413	25	3	OST-DNA-bsc	18.04	5134	741	0.5037	0.6296
DNA-Helicobacter-2019-04-24.one_line	2711601413	50	3	OST-DNA-bsc	15.04	2873	399	0.9001	0.9748
DNA-Helicobacter-2019-04-24.one_line	2711601413	100	3	OST-DNA-bsc	13.36	1848	298	1.3993	1.1594
DNA-Helicobacter-2019-04-24.one_line	2711601413	125	3	OST-DNA-bsc	13.05	1600	288	1.6162	1.1718
DNA-Helicobacter-2019-04-24.one_line	2711601413	150	3	OST-DNA-bsc	12.91	1441	275	1.7946	1.214
DNA-Helicobacter-2019-04-24.one_line	2711601413	250	3	OST-DNA-bsc	12.65	1196	263	2.1622	1.2438
DNA-Helicobacter-2019-04-24.one_line	2711601413	500	3	OST-DNA-bsc	12.61	979	253	2.6415	1.2889
DNA-Helicobacter-2019-04-24.one_line	2711601413	750	3	OST-DNA-bsc	12.74	898	251	2.8797	1.3126
DNA-Helicobacter-2019-04-24.one_line	2711601413	1000	3	OST-DNA-bsc	12.74	866	246	2.9861	1.3392
DNA-Helicobacter-2019-04-24.one_line	2711601413	2500	3	OST-DNA-bsc	13.08	813	244	3.1808	1.3863
DNA-Helicobacter-2019-04-24.one_line	2711601413	5000	3	OST-DNA-bsc	13.3	784	251	3.2984	1.3703
DNA-Helicobacter-2019-04-24.one_line	2711601413	10000	3	OST-DNA-bsc	13.57	758	249	3.4116	1.4093
DNA-Helicobacter-2019-04-24.one_line	2711601413	25	4	OST-DNA-bsc	18.04	4961	700	0.5213	0.6664
DNA-Helicobacter-2019-04-24.one_line	2711601413	50	4	OST-DNA-bsc	15.03	2943	391	0.8787	0.994
DNA-Helicobacter-2019-04-24.one_line	2711601413	100	4	OST-DNA-bsc	13.36	1848	302	1.3993	1.144
DNA-Helicobacter-2019-04-24.one_line	2711601413	125	4	OST-DNA-bsc	13.05	1625	287	1.5914	1.1759
DNA-Helicobacter-2019-04-24.one_line	2711601413	150	4	OST-DNA-bsc	12.91	1512	282	1.7103	1.1839
DNA-Helicobacter-2019-04-24.one_line	2711601413	250	4	OST-DNA-bsc	12.64	1268	269	2.0394	1.2151
DNA-Helicobacter-2019-04-24.one_line	2711601413	500	4	OST-DNA-bsc	12.62	997	261	2.5938	1.2504
DNA-Helicobacter-2019-04-24.one_line	2711601413	750	4	OST-DNA-bsc	12.74	929	248	2.7836	1.3284
DNA-Helicobacter-2019-04-24.one_line	2711601413	1000	4	OST-DNA-bsc	12.76	892	245	2.8991	1.3468
DNA-Helicobacter-2019-04-24.one_line	2711601413	2500	4	OST-DNA-bsc	13.15	829	250	3.1194	1.3602
DNA-Helicobacter-2019-04-24.one_line	2711601413	5000	4	OST-DNA-bsc	13.41	784	253	3.2984	1.3707
DNA-Helicobacter-2019-04-24.one_line	2711601413	10000	4	OST-DNA-bsc	13.65	766	252	3.376	1.4007
DNA-Helicobacter-2019-04-24.one_line	2711601413	25	5	OST-DNA-bsc	18.04	4936	714	0.5239	0.6534
DNA-Helicobacter-2019-04-24.one_line	2711601413	50	5	OST-DNA-bsc	15.03	2912	398	0.888	0.9766
DNA-Helicobacter-2019-04-24.one_line	2711601413	100	5	OST-DNA-bsc	13.36	1864	291	1.3873	1.1872
DNA-Helicobacter-2019-04-24.one_line	2711601413	125	5	OST-DNA-bsc	13.05	1621	280	1.5953	1.2053
DNA-Helicobacter-2019-04-24.one_line	2711601413	150	5	OST-DNA-bsc	12.91	1484	281	1.7426	1.1881
DNA-Helicobacter-2019-04-24.one_line	2711601413	250	5	OST-DNA-bsc	12.64	1288	264	2.0078	1.2381
DNA-Helicobacter-2019-04-24.one_line	2711601413	500	5	OST-DNA-bsc	12.62	993	257	2.6042	1.2698
DNA-Helicobacter-2019-04-24.one_line	2711601413	750	5	OST-DNA-bsc	12.74	926	242	2.7926	1.3614
DNA-Helicobacter-2019-04-24.one_line	2711601413	1000	5	OST-DNA-bsc	12.76	886	246	2.9187	1.3413
DNA-Helicobacter-2019-04-24.one_line	2711601413	2500	5	OST-DNA-bsc	13.15	802	253	3.2244	1.3441
DNA-Helicobacter-2019-04-24.one_line	2711601413	5000	5	OST-DNA-bsc	13.41	792	245	3.2651	1.4154
DNA-Helicobacter-2019-04-24.one_line	2711601413	10000	5	OST-DNA-bsc	13.65	764	253	3.3848	1.3952
DNA-Helicobacter-2019-04-24.one_line	2711601413	25	1	OST-DNA-bzip2	26.57	4764	506	0.5428	1.3579
DNA-Helicobacter-2019-04-24.one_line	2711601413	50	1	OST-DNA-bzip2	26.01	2740	283	0.9438	2.3767
DNA-Helicobacter-2019-04-24.one_line	2711601413	100	1	OST-DNA-bzip2	25.88	1715	226	1.5079	2.9613
DNA-Helicobacter-2019-04-24.one_line	2711601413	125	1	OST-DNA-bzip2	25.86	1498	197	1.7263	3.3946
DNA-Helicobacter-2019-04-24.one_line	2711601413	150	1	OST-DNA-bzip2	25.85	1345	195	1.9227	3.4281
DNA-Helicobacter-2019-04-24.one_line	2711601413	250	1	OST-DNA-bzip2	25.83	1220	176	2.1197	3.7952
DNA-Helicobacter-2019-04-24.one_line	2711601413	500	1	OST-DNA-bzip2	25.83	1096	184	2.3595	3.6302
DNA-Helicobacter-2019-04-24.one_line	2711601413	750	1	OST-DNA-bzip2	25.85	995	174	2.599	3.8418
DNA-Helicobacter-2019-04-24.one_line	2711601413	1000	1	OST-DNA-bzip2	25.87	949	180	2.725	3.7166
DNA-Helicobacter-2019-04-24.one_line	2711601413	2500	1	OST-DNA-bzip2	25.98	861	186	3.0035	3.612
DNA-Helicobacter-2019-04-24.one_line	2711601413	5000	1	OST-DNA-bzip2	26.07	804	175	3.2164	3.8524
DNA-Helicobacter-2019-04-24.one_line	2711601413	10000	1	OST-DNA-bzip2	26.16	774	181	3.3411	3.7375
DNA-Helicobacter-2019-04-24.one_line	2711601413	25	2	OST-DNA-bzip2	26.32	4847	582	0.5335	1.1695
DNA-Helicobacter-2019-04-24.one_line	2711601413	50	2	OST-DNA-bzip2	25.47	2804	306	0.9222	2.1525
DNA-Helicobacter-2019-04-24.one_line	2711601413	100	2	OST-DNA-bzip2	25.32	1713	216	1.5096	3.0313
DNA-Helicobacter-2019-04-24.one_line	2711601413	125	2	OST-DNA-bzip2	25.35	1506	197	1.7171	3.3277
DNA-Helicobacter-2019-04-24.one_line	2711601413	150	2	OST-DNA-bzip2	25.37	1373	194	1.8835	3.3818
DNA-Helicobacter-2019-04-24.one_line	2711601413	250	2	OST-DNA-bzip2	25.46	1105	175	2.3403	3.7622
DNA-Helicobacter-2019-04-24.one_line	2711601413	500	2	OST-DNA-bzip2	25.62	893	172	2.8958	3.8519
DNA-Helicobacter-2019-04-24.one_line	2711601413	750	2	OST-DNA-bzip2	25.72	829	159	3.1194	4.1831
DNA-Helicobacter-2019-04-24.one_line	2711601413	1000	2	OST-DNA-bzip2	25.79	800	154	3.2325	4.3307
DNA-Helicobacter-2019-04-24.one_line	2711601413	2500	2	OST-DNA-bzip2	25.95	722	162	3.5817	4.1424
DNA-Helicobacter-2019-04-24.one_line	2711601413	5000	2	OST-DNA-bzip2	26.06	729	157	3.5473	4.2924
DNA-Helicobacter-2019-04-24.one_line	2711601413	10000	2	OST-DNA-bzip2	26.15	665	155	3.8887	4.3628
DNA-Helicobacter-2019-04-24.one_line	2711601413	25	3	OST-DNA-bzip2	26.22	4909	667	0.5268	1.0166
DNA-Helicobacter-2019-04-24.one_line	2711601413	50	3	OST-DNA-bzip2	25.46	2867	333	0.902	1.9772
DNA-Helicobacter-2019-04-24.one_line	2711601413	100	3	OST-DNA-bzip2	25.32	1767	217	1.4635	3.0174
DNA-Helicobacter-2019-04-24.one_line	2711601413	125	3	OST-DNA-bzip2	25.35	1533	200	1.6869	3.2777
DNA-Helicobacter-2019-04-24.one_line	2711601413	150	3	OST-DNA-bzip2	25.37	1402	191	1.8445	3.4349
DNA-Helicobacter-2019-04-24.one_line	2711601413	250	3	OST-DNA-bzip2	25.46	1128	175	2.2925	3.7622
DNA-Helicobacter-2019-04-24.one_line	2711601413	500	3	OST-DNA-bzip2	25.62	909	163	2.8449	4.0646
DNA-Helicobacter-2019-04-24.one_line	2711601413	750	3	OST-DNA-bzip2	25.72	855	159	3.0245	4.1831
DNA-Helicobacter-2019-04-24.one_line	2711601413	1000	3	OST-DNA-bzip2	25.8	792	156	3.2651	4.2768
DNA-Helicobacter-2019-04-24.one_line	2711601413	2500	3	OST-DNA-bzip2	25.95	721	154	3.5867	4.3576
DNA-Helicobacter-2019-04-24.one_line	2711601413	5000	3	OST-DNA-bzip2	26.06	694	156	3.7262	4.3199
DNA-Helicobacter-2019-04-24.one_line	2711601413	10000	3	OST-DNA-bzip2	26.15	690	155	3.7478	4.3628
DNA-Helicobacter-2019-04-24.one_line	2711601413	25	4	OST-DNA-bzip2	26.22	5245	567	0.493	1.1958
DNA-Helicobacter-2019-04-24.one_line	2711601413	50	4	OST-DNA-bzip2	25.46	2828	305	0.9144	2.1587
DNA-Helicobacter-2019-04-24.one_line	2711601413	100	4	OST-DNA-bzip2	25.32	1838	213	1.407	3.074
DNA-Helicobacter-2019-04-24.one_line	2711601413	125	4	OST-DNA-bzip2	25.35	1613	200	1.6032	3.2777
DNA-Helicobacter-2019-04-24.one_line	2711601413	150	4	OST-DNA-bzip2	25.36	1439	189	1.7971	3.4699
DNA-Helicobacter-2019-04-24.one_line	2711601413	250	4	OST-DNA-bzip2	25.46	1160	174	2.2293	3.7839
DNA-Helicobacter-2019-04-24.one_line	2711601413	500	4	OST-DNA-bzip2	25.62	977	178	2.6469	3.7221
DNA-Helicobacter-2019-04-24.one_line	2711601413	750	4	OST-DNA-bzip2	25.72	881	161	2.9353	4.1312
DNA-Helicobacter-2019-04-24.one_line	2711601413	1000	4	OST-DNA-bzip2	25.78	819	159	3.1575	4.1929
DNA-Helicobacter-2019-04-24.one_line	2711601413	2500	4	OST-DNA-bzip2	25.95	736	165	3.5136	4.067
DNA-Helicobacter-2019-04-24.one_line	2711601413	5000	4	OST-DNA-bzip2	26.05	684	173	3.7807	3.8939
DNA-Helicobacter-2019-04-24.one_line	2711601413	10000	4	OST-DNA-bzip2	26.14	666	151	3.8829	4.4767
DNA-Helicobacter-2019-04-24.one_line	2711601413	25	5	OST-DNA-bzip2	26.22	4914	625	0.5262	1.0849
DNA-Helicobacter-2019-04-24.one_line	2711601413	50	5	OST-DNA-bzip2	25.46	2891	315	0.8945	2.0901
DNA-Helicobacter-2019-04-24.one_line	2711601413	100	5	OST-DNA-bzip2	25.32	1797	217	1.4391	3.0174
DNA-Helicobacter-2019-04-24.one_line	2711601413	125	5	OST-DNA-bzip2	25.35	1596	203	1.6203	3.2293
DNA-Helicobacter-2019-04-24.one_line	2711601413	150	5	OST-DNA-bzip2	25.36	1449	189	1.7847	3.4699
DNA-Helicobacter-2019-04-24.one_line	2711601413	250	5	OST-DNA-bzip2	25.46	1167	176	2.2159	3.7409
DNA-Helicobacter-2019-04-24.one_line	2711601413	500	5	OST-DNA-bzip2	25.62	950	181	2.7221	3.6604
DNA-Helicobacter-2019-04-24.one_line	2711601413	750	5	OST-DNA-bzip2	25.72	879	166	2.942	4.0067
DNA-Helicobacter-2019-04-24.one_line	2711601413	1000	5	OST-DNA-bzip2	25.78	828	164	3.1232	4.065
DNA-Helicobacter-2019-04-24.one_line	2711601413	2500	5	OST-DNA-bzip2	25.95	738	156	3.504	4.3017
DNA-Helicobacter-2019-04-24.one_line	2711601413	5000	5	OST-DNA-bzip2	26.05	688	159	3.7587	4.2368
DNA-Helicobacter-2019-04-24.one_line	2711601413	10000	5	OST-DNA-bzip2	26.14	655	162	3.9481	4.1727
DNA-Helicobacter-2019-04-24.one_line	2711601413	25	1	OST-DNA-lrzip	10.37	8870	372	0.2915	0.7209
DNA-Helicobacter-2019-04-24.one_line	2711601413	50	1	OST-DNA-lrzip	8.36	6498	175	0.398	1.2354
DNA-Helicobacter-2019-04-24.one_line	2711601413	100	1	OST-DNA-lrzip	6.73	5132	93	0.5039	1.8714
DNA-Helicobacter-2019-04-24.one_line	2711601413	125	1	OST-DNA-lrzip	6.31	4979	81	0.5194	2.0145
DNA-Helicobacter-2019-04-24.one_line	2711601413	150	1	OST-DNA-lrzip	6.02	4100	70	0.6307	2.2239
DNA-Helicobacter-2019-04-24.one_line	2711601413	250	1	OST-DNA-lrzip	5.44	3583	53	0.7217	2.6543
DNA-Helicobacter-2019-04-24.one_line	2711601413	500	1	OST-DNA-lrzip	4.99	3624	44	0.7136	2.9327
DNA-Helicobacter-2019-04-24.one_line	2711601413	750	1	OST-DNA-lrzip	4.83	3985	41	0.6489	3.0464
DNA-Helicobacter-2019-04-24.one_line	2711601413	1000	1	OST-DNA-lrzip	4.75	4002	36	0.6462	3.4121
DNA-Helicobacter-2019-04-24.one_line	2711601413	2500	1	OST-DNA-lrzip	4.66	4058	37	0.6373	3.2569
DNA-Helicobacter-2019-04-24.one_line	2711601413	5000	1	OST-DNA-lrzip	4.64	4187	33	0.6176	3.6361
DNA-Helicobacter-2019-04-24.one_line	2711601413	10000	1	OST-DNA-lrzip	4.62	4321	36	0.5985	3.3187
DNA-Helicobacter-2019-04-24.one_line	2711601413	25	2	OST-DNA-lrzip	11.51	8390	490	0.3082	0.6074
DNA-Helicobacter-2019-04-24.one_line	2711601413	50	2	OST-DNA-lrzip	8.89	6423	212	0.4026	1.0844
DNA-Helicobacter-2019-04-24.one_line	2711601413	100	2	OST-DNA-lrzip	6.99	5257	105	0.4919	1.7215
DNA-Helicobacter-2019-04-24.one_line	2711601413	125	2	OST-DNA-lrzip	6.5	5100	96	0.5071	1.7509
DNA-Helicobacter-2019-04-24.one_line	2711601413	150	2	OST-DNA-lrzip	6.16	4687	78	0.5517	2.0423
DNA-Helicobacter-2019-04-24.one_line	2711601413	250	2	OST-DNA-lrzip	5.51	4189	60	0.6173	2.3748
DNA-Helicobacter-2019-04-24.one_line	2711601413	500	2	OST-DNA-lrzip	5.02	3264	44	0.7923	2.9504
DNA-Helicobacter-2019-04-24.one_line	2711601413	750	2	OST-DNA-lrzip	4.85	2870	39	0.901	3.2159
DNA-Helicobacter-2019-04-24.one_line	2711601413	1000	2	OST-DNA-lrzip	4.78	2845	33	0.909	3.7458
DNA-Helicobacter-2019-04-24.one_line	2711601413	2500	2	OST-DNA-lrzip	4.7	2690	32	0.9613	3.7982
DNA-Helicobacter-2019-04-24.one_line	2711601413	5000	2	OST-DNA-lrzip	4.7	2793	29	0.9259	4.1911
DNA-Helicobacter-2019-04-24.one_line	2711601413	10000	2	OST-DNA-lrzip	4.72	2761	28	0.9366	4.3592
DNA-Helicobacter-2019-04-24.one_line	2711601413	25	3	OST-DNA-lrzip	11.68	8434	556	0.3066	0.5432
DNA-Helicobacter-2019-04-24.one_line	2711601413	50	3	OST-DNA-lrzip	8.9	6325	207	0.4089	1.1118
DNA-Helicobacter-2019-04-24.one_line	2711601413	100	3	OST-DNA-lrzip	6.99	5077	107	0.5094	1.6893
DNA-Helicobacter-2019-04-24.one_line	2711601413	125	3	OST-DNA-lrzip	6.5	4760	88	0.5433	1.9101
DNA-Helicobacter-2019-04-24.one_line	2711601413	150	3	OST-DNA-lrzip	6.16	4553	79	0.568	2.0164
DNA-Helicobacter-2019-04-24.one_line	2711601413	250	3	OST-DNA-lrzip	5.51	4259	59	0.6072	2.415
DNA-Helicobacter-2019-04-24.one_line	2711601413	500	3	OST-DNA-lrzip	5.03	3925	46	0.6588	2.8277
DNA-Helicobacter-2019-04-24.one_line	2711601413	750	3	OST-DNA-lrzip	4.86	3850	42	0.6717	2.9924
DNA-Helicobacter-2019-04-24.one_line	2711601413	1000	3	OST-DNA-lrzip	4.79	3801	38	0.6803	3.2597
DNA-Helicobacter-2019-04-24.one_line	2711601413	2500	3	OST-DNA-lrzip	4.71	3844	35	0.6727	3.48
DNA-Helicobacter-2019-04-24.one_line	2711601413	5000	3	OST-DNA-lrzip	4.72	3791	35	0.6821	3.4874
DNA-Helicobacter-2019-04-24.one_line	2711601413	10000	3	OST-DNA-lrzip	4.74	3997	32	0.647	3.8305
DNA-Helicobacter-2019-04-24.one_line	2711601413	25	4	OST-DNA-lrzip	11.68	8522	556	0.3034	0.5432
DNA-Helicobacter-2019-04-24.one_line	2711601413	50	4	OST-DNA-lrzip	8.9	6527	208	0.3962	1.1065
DNA-Helicobacter-2019-04-24.one_line	2711601413	100	4	OST-DNA-lrzip	6.99	5312	107	0.4868	1.6893
DNA-Helicobacter-2019-04-24.one_line	2711601413	125	4	OST-DNA-lrzip	6.5	5200	89	0.4973	1.8886
DNA-Helicobacter-2019-04-24.one_line	2711601413	150	4	OST-DNA-lrzip	6.17	4837	78	0.5346	2.0456
DNA-Helicobacter-2019-04-24.one_line	2711601413	250	4	OST-DNA-lrzip	5.52	4559	60	0.5672	2.3791
DNA-Helicobacter-2019-04-24.one_line	2711601413	500	4	OST-DNA-lrzip	5.04	4282	46	0.6039	2.8333
DNA-Helicobacter-2019-04-24.one_line	2711601413	750	4	OST-DNA-lrzip	4.88	4292	41	0.6025	3.078
DNA-Helicobacter-2019-04-24.one_line	2711601413	1000	4	OST-DNA-lrzip	4.81	4219	40	0.6129	3.1096
DNA-Helicobacter-2019-04-24.one_line	2711601413	2500	4	OST-DNA-lrzip	4.75	4174	36	0.6195	3.4121
DNA-Helicobacter-2019-04-24.one_line	2711601413	5000	4	OST-DNA-lrzip	4.79	4201	34	0.6156	3.6432
DNA-Helicobacter-2019-04-24.one_line	2711601413	10000	4	OST-DNA-lrzip	4.84	4243	34	0.6095	3.6812
DNA-Helicobacter-2019-04-24.one_line	2711601413	25	5	OST-DNA-lrzip	11.68	8466	526	0.3055	0.5742
DNA-Helicobacter-2019-04-24.one_line	2711601413	50	5	OST-DNA-lrzip	8.9	6230	202	0.4151	1.1394
DNA-Helicobacter-2019-04-24.one_line	2711601413	100	5	OST-DNA-lrzip	6.99	4964	109	0.5209	1.6584
DNA-Helicobacter-2019-04-24.one_line	2711601413	125	5	OST-DNA-lrzip	6.5	4664	89	0.5545	1.8886
DNA-Helicobacter-2019-04-24.one_line	2711601413	150	5	OST-DNA-lrzip	6.17	4411	77	0.5863	2.0721
DNA-Helicobacter-2019-04-24.one_line	2711601413	250	5	OST-DNA-lrzip	5.52	4076	59	0.6344	2.4194
DNA-Helicobacter-2019-04-24.one_line	2711601413	500	5	OST-DNA-lrzip	5.04	3799	46	0.6807	2.8333
DNA-Helicobacter-2019-04-24.one_line	2711601413	750	5	OST-DNA-lrzip	4.88	3730	40	0.6933	3.1549
DNA-Helicobacter-2019-04-24.one_line	2711601413	1000	5	OST-DNA-lrzip	4.81	3739	39	0.6916	3.1894
DNA-Helicobacter-2019-04-24.one_line	2711601413	2500	5	OST-DNA-lrzip	4.75	3776	34	0.6848	3.6128
DNA-Helicobacter-2019-04-24.one_line	2711601413	5000	5	OST-DNA-lrzip	4.79	3813	34	0.6782	3.6432
DNA-Helicobacter-2019-04-24.one_line	2711601413	10000	5	OST-DNA-lrzip	4.84	3630	32	0.7124	3.9113
DNA-Helicobacter-2019-04-24.one_line	2711601413	25	1	OST-DNA-lzip	13.34	9261	428	0.2792	0.806
DNA-Helicobacter-2019-04-24.one_line	2711601413	50	1	OST-DNA-lzip	10.58	5785	203	0.447	1.3478
DNA-Helicobacter-2019-04-24.one_line	2711601413	100	1	OST-DNA-lzip	8.36	4350	93	0.5945	2.3246
DNA-Helicobacter-2019-04-24.one_line	2711601413	125	1	OST-DNA-lzip	7.87	4057	77	0.6374	2.6431
DNA-Helicobacter-2019-04-24.one_line	2711601413	150	1	OST-DNA-lzip	7.54	3889	69	0.6649	2.8258
DNA-Helicobacter-2019-04-24.one_line	2711601413	250	1	OST-DNA-lzip	6.87	3728	52	0.6937	3.4165
DNA-Helicobacter-2019-04-24.one_line	2711601413	500	1	OST-DNA-lzip	6.38	3342	41	0.7738	4.024
DNA-Helicobacter-2019-04-24.one_line	2711601413	750	1	OST-DNA-lzip	6.21	3303	37	0.7829	4.3403
DNA-Helicobacter-2019-04-24.one_line	2711601413	1000	1	OST-DNA-lzip	6.16	3408	36	0.7588	4.4249
DNA-Helicobacter-2019-04-24.one_line	2711601413	2500	1	OST-DNA-lzip	6.17	3351	33	0.7717	4.835
DNA-Helicobacter-2019-04-24.one_line	2711601413	5000	1	OST-DNA-lzip	6.24	3424	31	0.7553	5.2053
DNA-Helicobacter-2019-04-24.one_line	2711601413	10000	1	OST-DNA-lzip	6.32	3321	30	0.7787	5.4478
DNA-Helicobacter-2019-04-24.one_line	2711601413	25	2	OST-DNA-lzip	14.14	9242	501	0.2798	0.7299
DNA-Helicobacter-2019-04-24.one_line	2711601413	50	2	OST-DNA-lzip	11.05	6604	249	0.3916	1.1476
DNA-Helicobacter-2019-04-24.one_line	2711601413	100	2	OST-DNA-lzip	8.54	5205	126	0.4968	1.7527
DNA-Helicobacter-2019-04-24.one_line	2711601413	125	2	OST-DNA-lzip	7.99	4928	103	0.5248	2.006
DNA-Helicobacter-2019-04-24.one_line	2711601413	150	2	OST-DNA-lzip	7.63	4617	92	0.5601	2.1447
DNA-Helicobacter-2019-04-24.one_line	2711601413	250	2	OST-DNA-lzip	6.9	4333	67	0.5968	2.6632
DNA-Helicobacter-2019-04-24.one_line	2711601413	500	2	OST-DNA-lzip	6.4	4121	48	0.6275	3.448
DNA-Helicobacter-2019-04-24.one_line	2711601413	750	2	OST-DNA-lzip	6.23	4055	43	0.6377	3.7467
DNA-Helicobacter-2019-04-24.one_line	2711601413	1000	2	OST-DNA-lzip	6.18	3981	40	0.6496	3.9953
DNA-Helicobacter-2019-04-24.one_line	2711601413	2500	2	OST-DNA-lzip	6.21	4039	36	0.6403	4.4608
DNA-Helicobacter-2019-04-24.one_line	2711601413	5000	2	OST-DNA-lzip	6.29	3980	33	0.6497	4.929
DNA-Helicobacter-2019-04-24.one_line	2711601413	10000	2	OST-DNA-lzip	6.41	3986	36	0.6488	4.6045
DNA-Helicobacter-2019-04-24.one_line	2711601413	25	3	OST-DNA-lzip	14.24	8825	573	0.293	0.6427
DNA-Helicobacter-2019-04-24.one_line	2711601413	50	3	OST-DNA-lzip	11.05	6438	205	0.4017	1.3939
DNA-Helicobacter-2019-04-24.one_line	2711601413	100	3	OST-DNA-lzip	8.54	5085	130	0.5086	1.6988
DNA-Helicobacter-2019-04-24.one_line	2711601413	125	3	OST-DNA-lzip	8	4897	103	0.5281	2.0085
DNA-Helicobacter-2019-04-24.one_line	2711601413	150	3	OST-DNA-lzip	7.63	4562	89	0.5669	2.217
DNA-Helicobacter-2019-04-24.one_line	2711601413	250	3	OST-DNA-lzip	6.91	4220	67	0.6128	2.667
DNA-Helicobacter-2019-04-24.one_line	2711601413	500	3	OST-DNA-lzip	6.4	4103	50	0.6303	3.3101
DNA-Helicobacter-2019-04-24.one_line	2711601413	750	3	OST-DNA-lzip	6.24	3933	43	0.6575	3.7527
DNA-Helicobacter-2019-04-24.one_line	2711601413	1000	3	OST-DNA-lzip	6.18	4036	43	0.6407	3.7166
DNA-Helicobacter-2019-04-24.one_line	2711601413	2500	3	OST-DNA-lzip	6.22	3970	35	0.6514	4.5957
DNA-Helicobacter-2019-04-24.one_line	2711601413	5000	3	OST-DNA-lzip	6.31	3866	35	0.6689	4.6622
DNA-Helicobacter-2019-04-24.one_line	2711601413	10000	3	OST-DNA-lzip	6.43	3886	35	0.6655	4.7508
DNA-Helicobacter-2019-04-24.one_line	2711601413	25	4	OST-DNA-lzip	14.24	8178	540	0.3162	0.6819
DNA-Helicobacter-2019-04-24.one_line	2711601413	50	4	OST-DNA-lzip	11.05	5665	203	0.4565	1.4076
DNA-Helicobacter-2019-04-24.one_line	2711601413	100	4	OST-DNA-lzip	8.54	4535	99	0.5702	2.2307
DNA-Helicobacter-2019-04-24.one_line	2711601413	125	4	OST-DNA-lzip	8	4289	85	0.6029	2.4339
DNA-Helicobacter-2019-04-24.one_line	2711601413	150	4	OST-DNA-lzip	7.64	4170	73	0.6201	2.7064
DNA-Helicobacter-2019-04-24.one_line	2711601413	250	4	OST-DNA-lzip	6.91	3847	57	0.6722	3.1349
DNA-Helicobacter-2019-04-24.one_line	2711601413	500	4	OST-DNA-lzip	6.42	3668	41	0.705	4.0493
DNA-Helicobacter-2019-04-24.one_line	2711601413	750	4	OST-DNA-lzip	6.25	3589	38	0.7205	4.2533
DNA-Helicobacter-2019-04-24.one_line	2711601413	1000	4	OST-DNA-lzip	6.2	3607	39	0.7169	4.1111
DNA-Helicobacter-2019-04-24.one_line	2711601413	2500	4	OST-DNA-lzip	6.25	3592	33	0.7199	4.8977
DNA-Helicobacter-2019-04-24.one_line	2711601413	5000	4	OST-DNA-lzip	6.37	3549	32	0.7287	5.1477
DNA-Helicobacter-2019-04-24.one_line	2711601413	10000	4	OST-DNA-lzip	6.52	3591	31	0.7201	5.4389
DNA-Helicobacter-2019-04-24.one_line	2711601413	25	5	OST-DNA-lzip	14.24	8184	543	0.316	0.6782
DNA-Helicobacter-2019-04-24.one_line	2711601413	50	5	OST-DNA-lzip	11.05	5679	205	0.4554	1.3939
DNA-Helicobacter-2019-04-24.one_line	2711601413	100	5	OST-DNA-lzip	8.54	4502	99	0.5744	2.2307
DNA-Helicobacter-2019-04-24.one_line	2711601413	125	5	OST-DNA-lzip	8	4326	86	0.5978	2.4056
DNA-Helicobacter-2019-04-24.one_line	2711601413	150	5	OST-DNA-lzip	7.64	4130	76	0.6261	2.5996
DNA-Helicobacter-2019-04-24.one_line	2711601413	250	5	OST-DNA-lzip	6.91	3842	56	0.6731	3.1909
DNA-Helicobacter-2019-04-24.one_line	2711601413	500	5	OST-DNA-lzip	6.42	3649	43	0.7087	3.8609
DNA-Helicobacter-2019-04-24.one_line	2711601413	750	5	OST-DNA-lzip	6.25	3639	38	0.7106	4.2533
DNA-Helicobacter-2019-04-24.one_line	2711601413	1000	5	OST-DNA-lzip	6.2	3610	36	0.7163	4.4536
DNA-Helicobacter-2019-04-24.one_line	2711601413	2500	5	OST-DNA-lzip	6.25	3549	32	0.7287	5.0508
DNA-Helicobacter-2019-04-24.one_line	2711601413	5000	5	OST-DNA-lzip	6.37	3617	35	0.715	4.7065
DNA-Helicobacter-2019-04-24.one_line	2711601413	10000	5	OST-DNA-lzip	6.52	3557	31	0.727	5.4389
DNA-Helicobacter-2019-04-24.one_line	2711601413	25	1	OST-DNA-xz	13.07	7776	358	0.3326	0.9441
DNA-Helicobacter-2019-04-24.one_line	2711601413	50	1	OST-DNA-xz	10.21	5496	163	0.4705	1.6198
DNA-Helicobacter-2019-04-24.one_line	2711601413	100	1	OST-DNA-xz	8.14	4336	86	0.5964	2.4477
DNA-Helicobacter-2019-04-24.one_line	2711601413	125	1	OST-DNA-xz	7.68	4048	72	0.6388	2.7584
DNA-Helicobacter-2019-04-24.one_line	2711601413	150	1	OST-DNA-xz	7.37	3836	63	0.6741	3.0252
DNA-Helicobacter-2019-04-24.one_line	2711601413	250	1	OST-DNA-xz	6.72	3593	46	0.7197	3.7778
DNA-Helicobacter-2019-04-24.one_line	2711601413	500	1	OST-DNA-xz	6.27	3434	35	0.7531	4.6326
DNA-Helicobacter-2019-04-24.one_line	2711601413	750	1	OST-DNA-xz	6.12	3344	31	0.7733	5.1052
DNA-Helicobacter-2019-04-24.one_line	2711601413	1000	1	OST-DNA-xz	6.07	3318	30	0.7794	5.2323
DNA-Helicobacter-2019-04-24.one_line	2711601413	2500	1	OST-DNA-xz	6.1	3304	26	0.7827	6.0671
DNA-Helicobacter-2019-04-24.one_line	2711601413	5000	1	OST-DNA-xz	6.18	3324	26	0.778	6.1467
DNA-Helicobacter-2019-04-24.one_line	2711601413	10000	1	OST-DNA-xz	6.27	3302	25	0.7832	6.4856
DNA-Helicobacter-2019-04-24.one_line	2711601413	25	2	OST-DNA-xz	13.88	8830	574	0.2929	0.6253
DNA-Helicobacter-2019-04-24.one_line	2711601413	50	2	OST-DNA-xz	10.56	5970	240	0.4332	1.1378
DNA-Helicobacter-2019-04-24.one_line	2711601413	100	2	OST-DNA-xz	8.29	4333	116	0.5968	1.8481
DNA-Helicobacter-2019-04-24.one_line	2711601413	125	2	OST-DNA-xz	7.78	4097	92	0.6312	2.1868
DNA-Helicobacter-2019-04-24.one_line	2711601413	150	2	OST-DNA-xz	7.43	3880	84	0.6665	2.2874
DNA-Helicobacter-2019-04-24.one_line	2711601413	250	2	OST-DNA-xz	6.75	3540	56	0.7305	3.117
DNA-Helicobacter-2019-04-24.one_line	2711601413	500	2	OST-DNA-xz	6.28	3368	41	0.7678	3.961
DNA-Helicobacter-2019-04-24.one_line	2711601413	750	2	OST-DNA-xz	6.13	3300	39	0.7836	4.0646
DNA-Helicobacter-2019-04-24.one_line	2711601413	1000	2	OST-DNA-xz	6.09	3262	36	0.7928	4.3746
DNA-Helicobacter-2019-04-24.one_line	2711601413	2500	2	OST-DNA-xz	6.14	3221	30	0.8029	5.2926
DNA-Helicobacter-2019-04-24.one_line	2711601413	5000	2	OST-DNA-xz	6.23	3232	30	0.8001	5.3702
DNA-Helicobacter-2019-04-24.one_line	2711601413	10000	2	OST-DNA-xz	6.35	3266	28	0.7918	5.8646
DNA-Helicobacter-2019-04-24.one_line	2711601413	25	3	OST-DNA-xz	13.98	9817	654	0.2634	0.5528
DNA-Helicobacter-2019-04-24.one_line	2711601413	50	3	OST-DNA-xz	10.56	6828	234	0.3787	1.167
DNA-Helicobacter-2019-04-24.one_line	2711601413	100	3	OST-DNA-xz	8.29	5078	113	0.5093	1.8972
DNA-Helicobacter-2019-04-24.one_line	2711601413	125	3	OST-DNA-xz	7.78	4756	102	0.5437	1.9724
DNA-Helicobacter-2019-04-24.one_line	2711601413	150	3	OST-DNA-xz	7.43	4521	81	0.572	2.3721
DNA-Helicobacter-2019-04-24.one_line	2711601413	250	3	OST-DNA-xz	6.75	4126	58	0.6268	3.0096
DNA-Helicobacter-2019-04-24.one_line	2711601413	500	3	OST-DNA-xz	6.29	3832	43	0.6748	3.7828
DNA-Helicobacter-2019-04-24.one_line	2711601413	750	3	OST-DNA-xz	6.14	3761	40	0.6876	3.9695
DNA-Helicobacter-2019-04-24.one_line	2711601413	1000	3	OST-DNA-xz	6.1	3749	36	0.6898	4.3818
DNA-Helicobacter-2019-04-24.one_line	2711601413	2500	3	OST-DNA-xz	6.15	3713	34	0.6965	4.6776
DNA-Helicobacter-2019-04-24.one_line	2711601413	5000	3	OST-DNA-xz	6.25	3695	30	0.6999	5.3875
DNA-Helicobacter-2019-04-24.one_line	2711601413	10000	3	OST-DNA-xz	6.37	3708	32	0.6974	5.1477
DNA-Helicobacter-2019-04-24.one_line	2711601413	25	4	OST-DNA-xz	13.98	8305	526	0.3114	0.6873
DNA-Helicobacter-2019-04-24.one_line	2711601413	50	4	OST-DNA-xz	10.56	5939	205	0.4354	1.3321
DNA-Helicobacter-2019-04-24.one_line	2711601413	100	4	OST-DNA-xz	8.3	4502	97	0.5744	2.2127
DNA-Helicobacter-2019-04-24.one_line	2711601413	125	4	OST-DNA-xz	7.78	4178	79	0.619	2.5467
DNA-Helicobacter-2019-04-24.one_line	2711601413	150	4	OST-DNA-xz	7.44	4031	67	0.6415	2.8716
DNA-Helicobacter-2019-04-24.one_line	2711601413	250	4	OST-DNA-xz	6.75	3711	50	0.6968	3.4911
DNA-Helicobacter-2019-04-24.one_line	2711601413	500	4	OST-DNA-xz	6.3	3490	36	0.741	4.5255
DNA-Helicobacter-2019-04-24.one_line	2711601413	750	4	OST-DNA-xz	6.15	3403	33	0.7599	4.8193
DNA-Helicobacter-2019-04-24.one_line	2711601413	1000	4	OST-DNA-xz	6.12	3349	31	0.7722	5.1052
DNA-Helicobacter-2019-04-24.one_line	2711601413	2500	4	OST-DNA-xz	6.18	3361	29	0.7694	5.5108
DNA-Helicobacter-2019-04-24.one_line	2711601413	5000	4	OST-DNA-xz	6.31	3374	26	0.7664	6.276
DNA-Helicobacter-2019-04-24.one_line	2711601413	10000	4	OST-DNA-xz	6.46	3341	26	0.774	6.4252
DNA-Helicobacter-2019-04-24.one_line	2711601413	25	5	OST-DNA-xz	13.98	8453	523	0.3059	0.6912
DNA-Helicobacter-2019-04-24.one_line	2711601413	50	5	OST-DNA-xz	10.56	5899	199	0.4384	1.3723
DNA-Helicobacter-2019-04-24.one_line	2711601413	100	5	OST-DNA-xz	8.3	4499	96	0.5748	2.2358
DNA-Helicobacter-2019-04-24.one_line	2711601413	125	5	OST-DNA-xz	7.78	4173	79	0.6197	2.5467
DNA-Helicobacter-2019-04-24.one_line	2711601413	150	5	OST-DNA-xz	7.44	4054	69	0.6379	2.7884
DNA-Helicobacter-2019-04-24.one_line	2711601413	250	5	OST-DNA-xz	6.75	3720	50	0.6952	3.4911
DNA-Helicobacter-2019-04-24.one_line	2711601413	500	5	OST-DNA-xz	6.3	3480	36	0.7431	4.5255
DNA-Helicobacter-2019-04-24.one_line	2711601413	750	5	OST-DNA-xz	6.15	3413	33	0.7577	4.8193
DNA-Helicobacter-2019-04-24.one_line	2711601413	1000	5	OST-DNA-xz	6.12	3364	32	0.7687	4.9457
DNA-Helicobacter-2019-04-24.one_line	2711601413	2500	5	OST-DNA-xz	6.18	3347	28	0.7726	5.7076
DNA-Helicobacter-2019-04-24.one_line	2711601413	5000	5	OST-DNA-xz	6.31	3294	27	0.7851	6.0435
DNA-Helicobacter-2019-04-24.one_line	2711601413	10000	5	OST-DNA-xz	6.46	3314	27	0.7803	6.1872
DNA-Influenza-2019-04-27.one_line	1106180040	25	1	OST-DNA-bcm	5.78	2008	307	0.5254	0.1986
DNA-Influenza-2019-04-27.one_line	1106180040	50	1	OST-DNA-bcm	4.28	1343	251	0.7855	0.1799
DNA-Influenza-2019-04-27.one_line	1106180040	100	1	OST-DNA-bcm	3.34	825	267	1.2787	0.132
DNA-Influenza-2019-04-27.one_line	1106180040	125	1	OST-DNA-bcm	3.11	741	224	1.4237	0.1465
DNA-Influenza-2019-04-27.one_line	1106180040	150	1	OST-DNA-bcm	2.95	669	213	1.5769	0.1461
DNA-Influenza-2019-04-27.one_line	1106180040	250	1	OST-DNA-bcm	2.68	544	229	1.9392	0.1235
DNA-Influenza-2019-04-27.one_line	1106180040	500	1	OST-DNA-bcm	2.45	496	208	2.1269	0.1243
DNA-Influenza-2019-04-27.one_line	1106180040	750	1	OST-DNA-bcm	2.4	421	200	2.5058	0.1266
DNA-Influenza-2019-04-27.one_line	1106180040	1000	1	OST-DNA-bcm	2.36	404	187	2.6112	0.1331
DNA-Influenza-2019-04-27.one_line	1106180040	2500	1	OST-DNA-bcm	2.36	411	208	2.5668	0.1197
DNA-Influenza-2019-04-27.one_line	1106180040	5000	1	OST-DNA-bcm	2.36	449	231	2.3495	0.1078
DNA-Influenza-2019-04-27.one_line	1106180040	10000	1	OST-DNA-bcm	2.36	346	228	3.0489	0.1092
DNA-Influenza-2019-04-27.one_line	1106180040	25	2	OST-DNA-bcm	6.31	2267	416	0.4653	0.16
DNA-Influenza-2019-04-27.one_line	1106180040	50	2	OST-DNA-bcm	4.46	1282	330	0.8229	0.1426
DNA-Influenza-2019-04-27.one_line	1106180040	100	2	OST-DNA-bcm	3.38	860	220	1.2267	0.1621
DNA-Influenza-2019-04-27.one_line	1106180040	125	2	OST-DNA-bcm	3.13	776	234	1.3595	0.1411
DNA-Influenza-2019-04-27.one_line	1106180040	150	2	OST-DNA-bcm	2.96	682	216	1.5468	0.1446
DNA-Influenza-2019-04-27.one_line	1106180040	250	2	OST-DNA-bcm	2.67	522	218	2.0209	0.1292
DNA-Influenza-2019-04-27.one_line	1106180040	500	2	OST-DNA-bcm	2.45	443	196	2.3813	0.1319
DNA-Influenza-2019-04-27.one_line	1106180040	750	2	OST-DNA-bcm	2.4	410	199	2.573	0.1272
DNA-Influenza-2019-04-27.one_line	1106180040	1000	2	OST-DNA-bcm	2.39	420	203	2.5118	0.1242
DNA-Influenza-2019-04-27.one_line	1106180040	2500	2	OST-DNA-bcm	2.38	369	195	2.8589	0.1288
DNA-Influenza-2019-04-27.one_line	1106180040	5000	2	OST-DNA-bcm	2.37	353	214	2.9885	0.1168
DNA-Influenza-2019-04-27.one_line	1106180040	10000	2	OST-DNA-bcm	2.39	386	229	2.733	0.1101
DNA-Influenza-2019-04-27.one_line	1106180040	25	3	OST-DNA-bcm	6.35	2141	369	0.4927	0.1815
DNA-Influenza-2019-04-27.one_line	1106180040	50	3	OST-DNA-bcm	4.46	1348	280	0.7826	0.168
DNA-Influenza-2019-04-27.one_line	1106180040	100	3	OST-DNA-bcm	3.38	801	231	1.317	0.1544
DNA-Influenza-2019-04-27.one_line	1106180040	125	3	OST-DNA-bcm	3.13	776	239	1.3595	0.1382
DNA-Influenza-2019-04-27.one_line	1106180040	150	3	OST-DNA-bcm	2.96	691	270	1.5267	0.1157
DNA-Influenza-2019-04-27.one_line	1106180040	250	3	OST-DNA-bcm	2.68	568	216	1.8573	0.1309
DNA-Influenza-2019-04-27.one_line	1106180040	500	3	OST-DNA-bcm	2.45	472	278	2.235	0.093
DNA-Influenza-2019-04-27.one_line	1106180040	750	3	OST-DNA-bcm	2.4	468	231	2.2541	0.1096
DNA-Influenza-2019-04-27.one_line	1106180040	1000	3	OST-DNA-bcm	2.4	533	216	1.9792	0.1172
DNA-Influenza-2019-04-27.one_line	1106180040	2500	3	OST-DNA-bcm	2.38	366	217	2.8823	0.1157
DNA-Influenza-2019-04-27.one_line	1106180040	5000	3	OST-DNA-bcm	2.37	366	211	2.8823	0.1185
DNA-Influenza-2019-04-27.one_line	1106180040	10000	3	OST-DNA-bcm	2.39	427	215	2.4706	0.1173
DNA-Influenza-2019-04-27.one_line	1106180040	25	4	OST-DNA-bcm	6.34	2451	371	0.4304	0.1803
DNA-Influenza-2019-04-27.one_line	1106180040	50	4	OST-DNA-bcm	4.45	1250	264	0.8439	0.1778
DNA-Influenza-2019-04-27.one_line	1106180040	100	4	OST-DNA-bcm	3.37	795	231	1.327	0.1539
DNA-Influenza-2019-04-27.one_line	1106180040	125	4	OST-DNA-bcm	3.12	713	228	1.4796	0.1444
DNA-Influenza-2019-04-27.one_line	1106180040	150	4	OST-DNA-bcm	2.96	642	255	1.6432	0.1225
DNA-Influenza-2019-04-27.one_line	1106180040	250	4	OST-DNA-bcm	2.67	527	213	2.0018	0.1322
DNA-Influenza-2019-04-27.one_line	1106180040	500	4	OST-DNA-bcm	2.45	446	195	2.3653	0.1325
DNA-Influenza-2019-04-27.one_line	1106180040	750	4	OST-DNA-bcm	2.39	402	202	2.6242	0.1248
DNA-Influenza-2019-04-27.one_line	1106180040	1000	4	OST-DNA-bcm	2.39	397	195	2.6573	0.1293
DNA-Influenza-2019-04-27.one_line	1106180040	2500	4	OST-DNA-bcm	2.37	359	196	2.9385	0.1276
DNA-Influenza-2019-04-27.one_line	1106180040	5000	4	OST-DNA-bcm	2.36	385	195	2.7401	0.1277
DNA-Influenza-2019-04-27.one_line	1106180040	10000	4	OST-DNA-bcm	2.38	355	199	2.9716	0.1262
DNA-Influenza-2019-04-27.one_line	1106180040	25	5	OST-DNA-bcm	6.34	2145	344	0.4918	0.1944
DNA-Influenza-2019-04-27.one_line	1106180040	50	5	OST-DNA-bcm	4.45	1319	280	0.7998	0.1677
DNA-Influenza-2019-04-27.one_line	1106180040	100	5	OST-DNA-bcm	3.37	768	233	1.3736	0.1526
DNA-Influenza-2019-04-27.one_line	1106180040	125	5	OST-DNA-bcm	3.12	699	223	1.5092	0.1476
DNA-Influenza-2019-04-27.one_line	1106180040	150	5	OST-DNA-bcm	2.96	654	205	1.6131	0.1523
DNA-Influenza-2019-04-27.one_line	1106180040	250	5	OST-DNA-bcm	2.67	507	215	2.0807	0.131
DNA-Influenza-2019-04-27.one_line	1106180040	500	5	OST-DNA-bcm	2.45	473	200	2.2303	0.1292
DNA-Influenza-2019-04-27.one_line	1106180040	750	5	OST-DNA-bcm	2.39	437	184	2.414	0.137
DNA-Influenza-2019-04-27.one_line	1106180040	1000	5	OST-DNA-bcm	2.39	409	189	2.5793	0.1334
DNA-Influenza-2019-04-27.one_line	1106180040	2500	5	OST-DNA-bcm	2.37	361	182	2.9223	0.1374
DNA-Influenza-2019-04-27.one_line	1106180040	5000	5	OST-DNA-bcm	2.36	341	179	3.0937	0.1391
DNA-Influenza-2019-04-27.one_line	1106180040	10000	5	OST-DNA-bcm	2.38	332	195	3.1775	0.1288
DNA-Influenza-2019-04-27.one_line	1106180040	25	1	OST-DNA-brotli	4.13	4846	137	0.2177	0.318
DNA-Influenza-2019-04-27.one_line	1106180040	50	1	OST-DNA-brotli	2.97	4287	54	0.2461	0.5802
DNA-Influenza-2019-04-27.one_line	1106180040	100	1	OST-DNA-brotli	2.16	3680	23	0.2867	0.9907
DNA-Influenza-2019-04-27.one_line	1106180040	125	1	OST-DNA-brotli	1.93	3260	26	0.3236	0.7831
DNA-Influenza-2019-04-27.one_line	1106180040	150	1	OST-DNA-brotli	1.79	3007	17	0.3508	1.1108
DNA-Influenza-2019-04-27.one_line	1106180040	250	1	OST-DNA-brotli	1.46	2367	10	0.4457	1.5402
DNA-Influenza-2019-04-27.one_line	1106180040	500	1	OST-DNA-brotli	1.15	1945	7	0.5424	1.7331
DNA-Influenza-2019-04-27.one_line	1106180040	750	1	OST-DNA-brotli	1.07	1808	7	0.5835	1.6125
DNA-Influenza-2019-04-27.one_line	1106180040	1000	1	OST-DNA-brotli	1.02	1869	6	0.5644	1.7934
DNA-Influenza-2019-04-27.one_line	1106180040	2500	1	OST-DNA-brotli	0.98	1807	3	0.5838	3.4461
DNA-Influenza-2019-04-27.one_line	1106180040	5000	1	OST-DNA-brotli	0.97	1850	3	0.5702	3.411
DNA-Influenza-2019-04-27.one_line	1106180040	10000	1	OST-DNA-brotli	0.97	1922	4	0.5489	2.5582
DNA-Influenza-2019-04-27.one_line	1106180040	25	2	OST-DNA-brotli	4.88	5349	137	0.1972	0.3758
DNA-Influenza-2019-04-27.one_line	1106180040	50	2	OST-DNA-brotli	3.27	4168	54	0.2531	0.6388
DNA-Influenza-2019-04-27.one_line	1106180040	100	2	OST-DNA-brotli	2.28	3369	25	0.3131	0.9621
DNA-Influenza-2019-04-27.one_line	1106180040	125	2	OST-DNA-brotli	2.02	3149	21	0.335	1.0147
DNA-Influenza-2019-04-27.one_line	1106180040	150	2	OST-DNA-brotli	1.86	2914	17	0.362	1.1542
DNA-Influenza-2019-04-27.one_line	1106180040	250	2	OST-DNA-brotli	1.49	2442	14	0.432	1.1228
DNA-Influenza-2019-04-27.one_line	1106180040	500	2	OST-DNA-brotli	1.17	1951	7	0.5407	1.7632
DNA-Influenza-2019-04-27.one_line	1106180040	750	2	OST-DNA-brotli	1.07	1793	5	0.5884	2.2576
DNA-Influenza-2019-04-27.one_line	1106180040	1000	2	OST-DNA-brotli	1.03	1755	5	0.6011	2.1732
DNA-Influenza-2019-04-27.one_line	1106180040	2500	2	OST-DNA-brotli	0.98	1710	3	0.6169	3.4461
DNA-Influenza-2019-04-27.one_line	1106180040	5000	2	OST-DNA-brotli	0.98	1677	3	0.6291	3.4461
DNA-Influenza-2019-04-27.one_line	1106180040	10000	2	OST-DNA-brotli	0.98	1737	3	0.6073	3.4461
DNA-Influenza-2019-04-27.one_line	1106180040	25	3	OST-DNA-brotli	4.93	4899	146	0.2153	0.3562
DNA-Influenza-2019-04-27.one_line	1106180040	50	3	OST-DNA-brotli	3.27	4381	73	0.2408	0.4726
DNA-Influenza-2019-04-27.one_line	1106180040	100	3	OST-DNA-brotli	2.28	3354	26	0.3145	0.9251
DNA-Influenza-2019-04-27.one_line	1106180040	125	3	OST-DNA-brotli	2.02	3057	23	0.3451	0.9265
DNA-Influenza-2019-04-27.one_line	1106180040	150	3	OST-DNA-brotli	1.86	2958	17	0.3566	1.1542
DNA-Influenza-2019-04-27.one_line	1106180040	250	3	OST-DNA-brotli	1.49	2357	12	0.4476	1.3099
DNA-Influenza-2019-04-27.one_line	1106180040	500	3	OST-DNA-brotli	1.17	1955	7	0.5396	1.7632
DNA-Influenza-2019-04-27.one_line	1106180040	750	3	OST-DNA-brotli	1.07	2016	9	0.5233	1.2542
DNA-Influenza-2019-04-27.one_line	1106180040	1000	3	OST-DNA-brotli	1.03	2947	8	0.358	1.3582
DNA-Influenza-2019-04-27.one_line	1106180040	2500	3	OST-DNA-brotli	0.98	2051	4	0.5144	2.5846
DNA-Influenza-2019-04-27.one_line	1106180040	5000	3	OST-DNA-brotli	0.98	1670	3	0.6317	3.4461
DNA-Influenza-2019-04-27.one_line	1106180040	10000	3	OST-DNA-brotli	0.98	1700	3	0.6206	3.4461
DNA-Influenza-2019-04-27.one_line	1106180040	25	4	OST-DNA-brotli	4.9	4859	142	0.2171	0.364
DNA-Influenza-2019-04-27.one_line	1106180040	50	4	OST-DNA-brotli	3.24	4313	59	0.2446	0.5793
DNA-Influenza-2019-04-27.one_line	1106180040	100	4	OST-DNA-brotli	2.25	3441	25	0.3066	0.9494
DNA-Influenza-2019-04-27.one_line	1106180040	125	4	OST-DNA-brotli	2	3100	21	0.3403	1.0047
DNA-Influenza-2019-04-27.one_line	1106180040	150	4	OST-DNA-brotli	1.84	2941	18	0.3587	1.0784
DNA-Influenza-2019-04-27.one_line	1106180040	250	4	OST-DNA-brotli	1.47	2409	11	0.4379	1.4098
DNA-Influenza-2019-04-27.one_line	1106180040	500	4	OST-DNA-brotli	1.15	1902	7	0.5546	1.7331
DNA-Influenza-2019-04-27.one_line	1106180040	750	4	OST-DNA-brotli	1.06	1727	6	0.6108	1.8637
DNA-Influenza-2019-04-27.one_line	1106180040	1000	4	OST-DNA-brotli	1.02	1716	5	0.6148	2.1521
DNA-Influenza-2019-04-27.one_line	1106180040	2500	4	OST-DNA-brotli	0.98	1658	4	0.6363	2.5846
DNA-Influenza-2019-04-27.one_line	1106180040	5000	4	OST-DNA-brotli	0.97	1652	3	0.6386	3.411
DNA-Influenza-2019-04-27.one_line	1106180040	10000	4	OST-DNA-brotli	0.97	1646	3	0.6409	3.411
DNA-Influenza-2019-04-27.one_line	1106180040	25	5	OST-DNA-brotli	4.9	4798	135	0.2199	0.3829
DNA-Influenza-2019-04-27.one_line	1106180040	50	5	OST-DNA-brotli	3.24	4088	55	0.2581	0.6215
DNA-Influenza-2019-04-27.one_line	1106180040	100	5	OST-DNA-brotli	2.25	3256	25	0.324	0.9494
DNA-Influenza-2019-04-27.one_line	1106180040	125	5	OST-DNA-brotli	2	2943	20	0.3585	1.0549
DNA-Influenza-2019-04-27.one_line	1106180040	150	5	OST-DNA-brotli	1.84	2922	16	0.361	1.2132
DNA-Influenza-2019-04-27.one_line	1106180040	250	5	OST-DNA-brotli	1.47	2279	11	0.4629	1.4098
DNA-Influenza-2019-04-27.one_line	1106180040	500	5	OST-DNA-brotli	1.15	1822	7	0.579	1.7331
DNA-Influenza-2019-04-27.one_line	1106180040	750	5	OST-DNA-brotli	1.06	1732	5	0.6091	2.2365
DNA-Influenza-2019-04-27.one_line	1106180040	1000	5	OST-DNA-brotli	1.02	1701	5	0.6202	2.1521
DNA-Influenza-2019-04-27.one_line	1106180040	2500	5	OST-DNA-brotli	0.98	1638	3	0.644	3.4461
DNA-Influenza-2019-04-27.one_line	1106180040	5000	5	OST-DNA-brotli	0.97	1656	3	0.637	3.411
DNA-Influenza-2019-04-27.one_line	1106180040	10000	5	OST-DNA-brotli	0.97	1645	3	0.6413	3.411
DNA-Influenza-2019-04-27.one_line	1106180040	25	1	OST-DNA-bsc	5.23	1900	175	0.5552	0.3153
DNA-Influenza-2019-04-27.one_line	1106180040	50	1	OST-DNA-bsc	3.9	1068	112	0.9878	0.3673
DNA-Influenza-2019-04-27.one_line	1106180040	100	1	OST-DNA-bsc	3.04	661	85	1.596	0.3773
DNA-Influenza-2019-04-27.one_line	1106180040	125	1	OST-DNA-bsc	2.82	576	79	1.8315	0.3766
DNA-Influenza-2019-04-27.one_line	1106180040	150	1	OST-DNA-bsc	2.67	524	71	2.0132	0.3967
DNA-Influenza-2019-04-27.one_line	1106180040	250	1	OST-DNA-bsc	2.4	401	66	2.6308	0.3836
DNA-Influenza-2019-04-27.one_line	1106180040	500	1	OST-DNA-bsc	2.16	334	60	3.1585	0.3798
DNA-Influenza-2019-04-27.one_line	1106180040	750	1	OST-DNA-bsc	2.1	294	58	3.5882	0.382
DNA-Influenza-2019-04-27.one_line	1106180040	1000	1	OST-DNA-bsc	2.07	282	56	3.7409	0.3899
DNA-Influenza-2019-04-27.one_line	1106180040	2500	1	OST-DNA-bsc	2.04	252	53	4.1863	0.4061
DNA-Influenza-2019-04-27.one_line	1106180040	5000	1	OST-DNA-bsc	2.04	243	54	4.3413	0.3985
DNA-Influenza-2019-04-27.one_line	1106180040	10000	1	OST-DNA-bsc	2.04	242	55	4.3592	0.3913
DNA-Influenza-2019-04-27.one_line	1106180040	25	2	OST-DNA-bsc	5.81	1942	203	0.5432	0.3019
DNA-Influenza-2019-04-27.one_line	1106180040	50	2	OST-DNA-bsc	4.09	1108	119	0.9521	0.3626
DNA-Influenza-2019-04-27.one_line	1106180040	100	2	OST-DNA-bsc	3.09	679	85	1.5537	0.3835
DNA-Influenza-2019-04-27.one_line	1106180040	125	2	OST-DNA-bsc	2.86	574	76	1.8379	0.397
DNA-Influenza-2019-04-27.one_line	1106180040	150	2	OST-DNA-bsc	2.69	523	74	2.0171	0.3835
DNA-Influenza-2019-04-27.one_line	1106180040	250	2	OST-DNA-bsc	2.42	404	65	2.6112	0.3928
DNA-Influenza-2019-04-27.one_line	1106180040	500	2	OST-DNA-bsc	2.17	316	60	3.3384	0.3815
DNA-Influenza-2019-04-27.one_line	1106180040	750	2	OST-DNA-bsc	2.11	290	59	3.6377	0.3773
DNA-Influenza-2019-04-27.one_line	1106180040	1000	2	OST-DNA-bsc	2.09	277	58	3.8084	0.3801
DNA-Influenza-2019-04-27.one_line	1106180040	2500	2	OST-DNA-bsc	2.07	266	59	3.9659	0.3701
DNA-Influenza-2019-04-27.one_line	1106180040	5000	2	OST-DNA-bsc	2.07	263	60	4.0112	0.364
DNA-Influenza-2019-04-27.one_line	1106180040	10000	2	OST-DNA-bsc	2.06	254	57	4.1533	0.3813
DNA-Influenza-2019-04-27.one_line	1106180040	25	3	OST-DNA-bsc	5.85	2097	212	0.5031	0.2911
DNA-Influenza-2019-04-27.one_line	1106180040	50	3	OST-DNA-bsc	4.1	1135	124	0.9295	0.3488
DNA-Influenza-2019-04-27.one_line	1106180040	100	3	OST-DNA-bsc	3.09	691	90	1.5267	0.3622
DNA-Influenza-2019-04-27.one_line	1106180040	125	3	OST-DNA-bsc	2.86	592	79	1.782	0.3819
DNA-Influenza-2019-04-27.one_line	1106180040	150	3	OST-DNA-bsc	2.69	545	74	1.9357	0.3835
DNA-Influenza-2019-04-27.one_line	1106180040	250	3	OST-DNA-bsc	2.42	412	67	2.5605	0.381
DNA-Influenza-2019-04-27.one_line	1106180040	500	3	OST-DNA-bsc	2.17	310	57	3.403	0.4016
DNA-Influenza-2019-04-27.one_line	1106180040	750	3	OST-DNA-bsc	2.11	295	52	3.5761	0.4281
DNA-Influenza-2019-04-27.one_line	1106180040	1000	3	OST-DNA-bsc	2.09	278	56	3.7947	0.3937
DNA-Influenza-2019-04-27.one_line	1106180040	2500	3	OST-DNA-bsc	2.07	250	56	4.2197	0.3899
DNA-Influenza-2019-04-27.one_line	1106180040	5000	3	OST-DNA-bsc	2.07	246	54	4.2884	0.4044
DNA-Influenza-2019-04-27.one_line	1106180040	10000	3	OST-DNA-bsc	2.07	243	56	4.3413	0.3899
DNA-Influenza-2019-04-27.one_line	1106180040	25	4	OST-DNA-bsc	5.85	2074	216	0.5086	0.2857
DNA-Influenza-2019-04-27.one_line	1106180040	50	4	OST-DNA-bsc	4.1	1115	123	0.9461	0.3516
DNA-Influenza-2019-04-27.one_line	1106180040	100	4	OST-DNA-bsc	3.1	686	93	1.5378	0.3516
DNA-Influenza-2019-04-27.one_line	1106180040	125	4	OST-DNA-bsc	2.86	600	83	1.7582	0.3635
DNA-Influenza-2019-04-27.one_line	1106180040	150	4	OST-DNA-bsc	2.7	536	78	1.9682	0.3652
DNA-Influenza-2019-04-27.one_line	1106180040	250	4	OST-DNA-bsc	2.42	419	70	2.5177	0.3647
DNA-Influenza-2019-04-27.one_line	1106180040	500	4	OST-DNA-bsc	2.17	328	65	3.2163	0.3522
DNA-Influenza-2019-04-27.one_line	1106180040	750	4	OST-DNA-bsc	2.11	303	66	3.4816	0.3373
DNA-Influenza-2019-04-27.one_line	1106180040	1000	4	OST-DNA-bsc	2.09	287	61	3.6757	0.3614
DNA-Influenza-2019-04-27.one_line	1106180040	2500	4	OST-DNA-bsc	2.07	264	59	3.996	0.3701
DNA-Influenza-2019-04-27.one_line	1106180040	5000	4	OST-DNA-bsc	2.07	256	58	4.1208	0.3765
DNA-Influenza-2019-04-27.one_line	1106180040	10000	4	OST-DNA-bsc	2.07	247	62	4.271	0.3522
DNA-Influenza-2019-04-27.one_line	1106180040	25	5	OST-DNA-bsc	5.85	1984	211	0.5317	0.2925
DNA-Influenza-2019-04-27.one_line	1106180040	50	5	OST-DNA-bsc	4.1	1132	143	0.9319	0.3025
DNA-Influenza-2019-04-27.one_line	1106180040	100	5	OST-DNA-bsc	3.1	708	99	1.49	0.3303
DNA-Influenza-2019-04-27.one_line	1106180040	125	5	OST-DNA-bsc	2.86	620	94	1.7015	0.321
DNA-Influenza-2019-04-27.one_line	1106180040	150	5	OST-DNA-bsc	2.7	544	83	1.9392	0.3432
DNA-Influenza-2019-04-27.one_line	1106180040	250	5	OST-DNA-bsc	2.42	423	85	2.4939	0.3003
DNA-Influenza-2019-04-27.one_line	1106180040	500	5	OST-DNA-bsc	2.17	335	68	3.1491	0.3366
DNA-Influenza-2019-04-27.one_line	1106180040	750	5	OST-DNA-bsc	2.11	315	64	3.349	0.3478
DNA-Influenza-2019-04-27.one_line	1106180040	1000	5	OST-DNA-bsc	2.09	300	61	3.5165	0.3614
DNA-Influenza-2019-04-27.one_line	1106180040	2500	5	OST-DNA-bsc	2.07	265	62	3.9809	0.3522
DNA-Influenza-2019-04-27.one_line	1106180040	5000	5	OST-DNA-bsc	2.07	255	59	4.137	0.3701
DNA-Influenza-2019-04-27.one_line	1106180040	10000	5	OST-DNA-bsc	2.07	251	62	4.2029	0.3522
DNA-Influenza-2019-04-27.one_line	1106180040	25	1	OST-DNA-bzip2	10.27	1963	149	0.5374	0.7271
DNA-Influenza-2019-04-27.one_line	1106180040	50	1	OST-DNA-bzip2	8.01	1244	93	0.848	0.9086
DNA-Influenza-2019-04-27.one_line	1106180040	100	1	OST-DNA-bzip2	6.7	736	63	1.4333	1.1219
DNA-Influenza-2019-04-27.one_line	1106180040	125	1	OST-DNA-bzip2	6.44	755	70	1.3973	0.9705
DNA-Influenza-2019-04-27.one_line	1106180040	150	1	OST-DNA-bzip2	6.23	631	55	1.6718	1.195
DNA-Influenza-2019-04-27.one_line	1106180040	250	1	OST-DNA-bzip2	5.89	522	51	2.0209	1.2183
DNA-Influenza-2019-04-27.one_line	1106180040	500	1	OST-DNA-bzip2	5.64	424	45	2.4881	1.3222
DNA-Influenza-2019-04-27.one_line	1106180040	750	1	OST-DNA-bzip2	5.58	398	45	2.6506	1.3081
DNA-Influenza-2019-04-27.one_line	1106180040	1000	1	OST-DNA-bzip2	5.56	415	45	2.542	1.3034
DNA-Influenza-2019-04-27.one_line	1106180040	2500	1	OST-DNA-bzip2	5.56	411	46	2.5668	1.2751
DNA-Influenza-2019-04-27.one_line	1106180040	5000	1	OST-DNA-bzip2	5.56	343	44	3.0756	1.3331
DNA-Influenza-2019-04-27.one_line	1106180040	10000	1	OST-DNA-bzip2	5.56	341	43	3.0937	1.3641
DNA-Influenza-2019-04-27.one_line	1106180040	25	2	OST-DNA-bzip2	10.74	2267	224	0.4653	0.5058
DNA-Influenza-2019-04-27.one_line	1106180040	50	2	OST-DNA-bzip2	8.13	1194	131	0.8835	0.6547
DNA-Influenza-2019-04-27.one_line	1106180040	100	2	OST-DNA-bzip2	6.68	781	68	1.3507	1.0363
DNA-Influenza-2019-04-27.one_line	1106180040	125	2	OST-DNA-bzip2	6.4	736	58	1.4333	1.1641
DNA-Influenza-2019-04-27.one_line	1106180040	150	2	OST-DNA-bzip2	6.18	684	56	1.5423	1.1642
DNA-Influenza-2019-04-27.one_line	1106180040	250	2	OST-DNA-bzip2	5.85	578	49	1.8251	1.2595
DNA-Influenza-2019-04-27.one_line	1106180040	500	2	OST-DNA-bzip2	5.63	476	60	2.2163	0.9899
DNA-Influenza-2019-04-27.one_line	1106180040	750	2	OST-DNA-bzip2	5.57	406	46	2.5984	1.2774
DNA-Influenza-2019-04-27.one_line	1106180040	1000	2	OST-DNA-bzip2	5.55	438	45	2.4085	1.3011
DNA-Influenza-2019-04-27.one_line	1106180040	2500	2	OST-DNA-bzip2	5.58	403	47	2.6177	1.2525
DNA-Influenza-2019-04-27.one_line	1106180040	5000	2	OST-DNA-bzip2	5.6	343	49	3.0756	1.2056
DNA-Influenza-2019-04-27.one_line	1106180040	10000	2	OST-DNA-bzip2	5.61	369	43	2.8589	1.3763
DNA-Influenza-2019-04-27.one_line	1106180040	25	3	OST-DNA-bzip2	10.75	2043	193	0.5164	0.5876
DNA-Influenza-2019-04-27.one_line	1106180040	50	3	OST-DNA-bzip2	8.13	1186	99	0.8895	0.8663
DNA-Influenza-2019-04-27.one_line	1106180040	100	3	OST-DNA-bzip2	6.68	755	66	1.3973	1.0677
DNA-Influenza-2019-04-27.one_line	1106180040	125	3	OST-DNA-bzip2	6.4	706	60	1.4942	1.1253
DNA-Influenza-2019-04-27.one_line	1106180040	150	3	OST-DNA-bzip2	6.18	621	57	1.6988	1.1438
DNA-Influenza-2019-04-27.one_line	1106180040	250	3	OST-DNA-bzip2	5.86	506	50	2.0849	1.2364
DNA-Influenza-2019-04-27.one_line	1106180040	500	3	OST-DNA-bzip2	5.62	432	50	2.442	1.1857
DNA-Influenza-2019-04-27.one_line	1106180040	750	3	OST-DNA-bzip2	5.57	428	46	2.4648	1.2774
DNA-Influenza-2019-04-27.one_line	1106180040	1000	3	OST-DNA-bzip2	5.58	402	47	2.6242	1.2525
DNA-Influenza-2019-04-27.one_line	1106180040	2500	3	OST-DNA-bzip2	5.57	416	44	2.5359	1.3355
DNA-Influenza-2019-04-27.one_line	1106180040	5000	3	OST-DNA-bzip2	5.61	362	48	2.9142	1.233
DNA-Influenza-2019-04-27.one_line	1106180040	10000	3	OST-DNA-bzip2	5.64	345	45	3.0578	1.3222
DNA-Influenza-2019-04-27.one_line	1106180040	25	4	OST-DNA-bzip2	10.75	2171	210	0.4859	0.54
DNA-Influenza-2019-04-27.one_line	1106180040	50	4	OST-DNA-bzip2	8.14	1273	100	0.8287	0.8587
DNA-Influenza-2019-04-27.one_line	1106180040	100	4	OST-DNA-bzip2	6.68	922	76	1.1442	0.9272
DNA-Influenza-2019-04-27.one_line	1106180040	125	4	OST-DNA-bzip2	6.4	862	62	1.2238	1.089
DNA-Influenza-2019-04-27.one_line	1106180040	150	4	OST-DNA-bzip2	6.19	629	69	1.6772	0.9464
DNA-Influenza-2019-04-27.one_line	1106180040	250	4	OST-DNA-bzip2	5.87	520	86	2.0287	0.7201
DNA-Influenza-2019-04-27.one_line	1106180040	500	4	OST-DNA-bzip2	5.63	485	46	2.1751	1.2911
DNA-Influenza-2019-04-27.one_line	1106180040	750	4	OST-DNA-bzip2	5.58	454	49	2.3236	1.2013
DNA-Influenza-2019-04-27.one_line	1106180040	1000	4	OST-DNA-bzip2	5.58	469	63	2.2493	0.9344
DNA-Influenza-2019-04-27.one_line	1106180040	2500	4	OST-DNA-bzip2	5.59	385	43	2.7401	1.3714
DNA-Influenza-2019-04-27.one_line	1106180040	5000	4	OST-DNA-bzip2	5.61	427	44	2.4706	1.345
DNA-Influenza-2019-04-27.one_line	1106180040	10000	4	OST-DNA-bzip2	5.62	401	48	2.6308	1.2352
DNA-Influenza-2019-04-27.one_line	1106180040	25	5	OST-DNA-bzip2	10.75	2072	188	0.5091	0.6032
DNA-Influenza-2019-04-27.one_line	1106180040	50	5	OST-DNA-bzip2	8.14	1183	106	0.8917	0.8101
DNA-Influenza-2019-04-27.one_line	1106180040	100	5	OST-DNA-bzip2	6.68	755	66	1.3973	1.0677
DNA-Influenza-2019-04-27.one_line	1106180040	125	5	OST-DNA-bzip2	6.4	717	60	1.4713	1.1253
DNA-Influenza-2019-04-27.one_line	1106180040	150	5	OST-DNA-bzip2	6.19	618	59	1.707	1.1068
DNA-Influenza-2019-04-27.one_line	1106180040	250	5	OST-DNA-bzip2	5.87	504	51	2.0931	1.2142
DNA-Influenza-2019-04-27.one_line	1106180040	500	5	OST-DNA-bzip2	5.63	432	47	2.442	1.2637
DNA-Influenza-2019-04-27.one_line	1106180040	750	5	OST-DNA-bzip2	5.58	396	46	2.664	1.2797
DNA-Influenza-2019-04-27.one_line	1106180040	1000	5	OST-DNA-bzip2	5.58	373	44	2.8282	1.3379
DNA-Influenza-2019-04-27.one_line	1106180040	2500	5	OST-DNA-bzip2	5.59	395	48	2.6707	1.2286
DNA-Influenza-2019-04-27.one_line	1106180040	5000	5	OST-DNA-bzip2	5.61	339	43	3.1119	1.3763
DNA-Influenza-2019-04-27.one_line	1106180040	10000	5	OST-DNA-bzip2	5.62	350	43	3.0141	1.3788
DNA-Influenza-2019-04-27.one_line	1106180040	25	1	OST-DNA-lrzip	4.2	2151	102	0.4904	0.4344
DNA-Influenza-2019-04-27.one_line	1106180040	50	1	OST-DNA-lrzip	3.22	1300	50	0.8115	0.6794
DNA-Influenza-2019-04-27.one_line	1106180040	100	1	OST-DNA-lrzip	2.43	870	26	1.2126	0.986
DNA-Influenza-2019-04-27.one_line	1106180040	125	1	OST-DNA-lrzip	2.16	834	23	1.2649	0.9907
DNA-Influenza-2019-04-27.one_line	1106180040	150	1	OST-DNA-lrzip	1.97	741	20	1.4237	1.0391
DNA-Influenza-2019-04-27.one_line	1106180040	250	1	OST-DNA-lrzip	1.59	641	16	1.6458	1.0483
DNA-Influenza-2019-04-27.one_line	1106180040	500	1	OST-DNA-lrzip	1.25	523	11	2.0171	1.1988
DNA-Influenza-2019-04-27.one_line	1106180040	750	1	OST-DNA-lrzip	1.15	495	10	2.1312	1.2132
DNA-Influenza-2019-04-27.one_line	1106180040	1000	1	OST-DNA-lrzip	1.1	487	10	2.1662	1.1604
DNA-Influenza-2019-04-27.one_line	1106180040	2500	1	OST-DNA-lrzip	1.05	471	9	2.2398	1.2308
DNA-Influenza-2019-04-27.one_line	1106180040	5000	1	OST-DNA-lrzip	1.04	481	10	2.1932	1.0971
DNA-Influenza-2019-04-27.one_line	1106180040	10000	1	OST-DNA-lrzip	1.04	457	9	2.3084	1.219
DNA-Influenza-2019-04-27.one_line	1106180040	25	2	OST-DNA-lrzip	4.97	2218	133	0.4756	0.3942
DNA-Influenza-2019-04-27.one_line	1106180040	50	2	OST-DNA-lrzip	3.54	1373	57	0.7683	0.6552
DNA-Influenza-2019-04-27.one_line	1106180040	100	2	OST-DNA-lrzip	2.59	890	32	1.1853	0.8538
DNA-Influenza-2019-04-27.one_line	1106180040	125	2	OST-DNA-lrzip	2.28	817	26	1.2912	0.9251
DNA-Influenza-2019-04-27.one_line	1106180040	150	2	OST-DNA-lrzip	2.06	759	23	1.3899	0.9449
DNA-Influenza-2019-04-27.one_line	1106180040	250	2	OST-DNA-lrzip	1.64	610	18	1.7294	0.9612
DNA-Influenza-2019-04-27.one_line	1106180040	500	2	OST-DNA-lrzip	1.27	571	13	1.8475	1.0306
DNA-Influenza-2019-04-27.one_line	1106180040	750	2	OST-DNA-lrzip	1.16	531	11	1.9867	1.1125
DNA-Influenza-2019-04-27.one_line	1106180040	1000	2	OST-DNA-lrzip	1.11	504	11	2.0931	1.0645
DNA-Influenza-2019-04-27.one_line	1106180040	2500	2	OST-DNA-lrzip	1.06	504	9	2.0931	1.2425
DNA-Influenza-2019-04-27.one_line	1106180040	5000	2	OST-DNA-lrzip	1.05	485	9	2.1751	1.2308
DNA-Influenza-2019-04-27.one_line	1106180040	10000	2	OST-DNA-lrzip	1.06	450	8	2.3443	1.3978
DNA-Influenza-2019-04-27.one_line	1106180040	25	3	OST-DNA-lrzip	5.03	2174	132	0.4853	0.402
DNA-Influenza-2019-04-27.one_line	1106180040	50	3	OST-DNA-lrzip	3.54	1299	56	0.8121	0.6669
DNA-Influenza-2019-04-27.one_line	1106180040	100	3	OST-DNA-lrzip	2.6	891	32	1.184	0.8571
DNA-Influenza-2019-04-27.one_line	1106180040	125	3	OST-DNA-lrzip	2.29	771	26	1.3683	0.9292
DNA-Influenza-2019-04-27.one_line	1106180040	150	3	OST-DNA-lrzip	2.06	711	23	1.4837	0.9449
DNA-Influenza-2019-04-27.one_line	1106180040	250	3	OST-DNA-lrzip	1.64	598	17	1.7641	1.0177
DNA-Influenza-2019-04-27.one_line	1106180040	500	3	OST-DNA-lrzip	1.27	497	13	2.1226	1.0306
DNA-Influenza-2019-04-27.one_line	1106180040	750	3	OST-DNA-lrzip	1.17	472	11	2.235	1.1221
DNA-Influenza-2019-04-27.one_line	1106180040	1000	3	OST-DNA-lrzip	1.12	460	10	2.2933	1.1815
DNA-Influenza-2019-04-27.one_line	1106180040	2500	3	OST-DNA-lrzip	1.06	441	9	2.3921	1.2425
DNA-Influenza-2019-04-27.one_line	1106180040	5000	3	OST-DNA-lrzip	1.06	433	8	2.4363	1.3978
DNA-Influenza-2019-04-27.one_line	1106180040	10000	3	OST-DNA-lrzip	1.06	423	8	2.4939	1.3978
DNA-Influenza-2019-04-27.one_line	1106180040	25	4	OST-DNA-lrzip	5.03	2130	130	0.4953	0.4082
DNA-Influenza-2019-04-27.one_line	1106180040	50	4	OST-DNA-lrzip	3.54	1341	57	0.7867	0.6552
DNA-Influenza-2019-04-27.one_line	1106180040	100	4	OST-DNA-lrzip	2.6	875	31	1.2056	0.8848
DNA-Influenza-2019-04-27.one_line	1106180040	125	4	OST-DNA-lrzip	2.29	777	25	1.3577	0.9663
DNA-Influenza-2019-04-27.one_line	1106180040	150	4	OST-DNA-lrzip	2.07	721	22	1.4632	0.9926
DNA-Influenza-2019-04-27.one_line	1106180040	250	4	OST-DNA-lrzip	1.64	588	17	1.7941	1.0177
DNA-Influenza-2019-04-27.one_line	1106180040	500	4	OST-DNA-lrzip	1.27	532	13	1.983	1.0306
DNA-Influenza-2019-04-27.one_line	1106180040	750	4	OST-DNA-lrzip	1.17	499	11	2.1141	1.1221
DNA-Influenza-2019-04-27.one_line	1106180040	1000	4	OST-DNA-lrzip	1.12	460	10	2.2933	1.1815
DNA-Influenza-2019-04-27.one_line	1106180040	2500	4	OST-DNA-lrzip	1.06	436	9	2.4196	1.2425
DNA-Influenza-2019-04-27.one_line	1106180040	5000	4	OST-DNA-lrzip	1.06	425	9	2.4822	1.2425
DNA-Influenza-2019-04-27.one_line	1106180040	10000	4	OST-DNA-lrzip	1.06	420	8	2.5118	1.3978
DNA-Influenza-2019-04-27.one_line	1106180040	25	5	OST-DNA-lrzip	5.03	2163	130	0.4877	0.4082
DNA-Influenza-2019-04-27.one_line	1106180040	50	5	OST-DNA-lrzip	3.54	1336	56	0.7896	0.6669
DNA-Influenza-2019-04-27.one_line	1106180040	100	5	OST-DNA-lrzip	2.6	868	30	1.2154	0.9143
DNA-Influenza-2019-04-27.one_line	1106180040	125	5	OST-DNA-lrzip	2.29	784	26	1.3456	0.9292
DNA-Influenza-2019-04-27.one_line	1106180040	150	5	OST-DNA-lrzip	2.07	720	23	1.4652	0.9494
DNA-Influenza-2019-04-27.one_line	1106180040	250	5	OST-DNA-lrzip	1.64	636	17	1.6587	1.0177
DNA-Influenza-2019-04-27.one_line	1106180040	500	5	OST-DNA-lrzip	1.27	503	13	2.0973	1.0306
DNA-Influenza-2019-04-27.one_line	1106180040	750	5	OST-DNA-lrzip	1.17	510	11	2.0685	1.1221
DNA-Influenza-2019-04-27.one_line	1106180040	1000	5	OST-DNA-lrzip	1.12	462	11	2.2834	1.0741
DNA-Influenza-2019-04-27.one_line	1106180040	2500	5	OST-DNA-lrzip	1.06	474	10	2.2256	1.1182
DNA-Influenza-2019-04-27.one_line	1106180040	5000	5	OST-DNA-lrzip	1.06	428	9	2.4648	1.2425
DNA-Influenza-2019-04-27.one_line	1106180040	10000	5	OST-DNA-lrzip	1.06	422	9	2.4998	1.2425
DNA-Influenza-2019-04-27.one_line	1106180040	25	1	OST-DNA-lzip	5.19	2377	131	0.4438	0.4179
DNA-Influenza-2019-04-27.one_line	1106180040	50	1	OST-DNA-lzip	4.03	1541	54	0.6846	0.7873
DNA-Influenza-2019-04-27.one_line	1106180040	100	1	OST-DNA-lzip	2.87	1071	29	0.985	1.044
DNA-Influenza-2019-04-27.one_line	1106180040	125	1	OST-DNA-lzip	2.56	904	24	1.167	1.1253
DNA-Influenza-2019-04-27.one_line	1106180040	150	1	OST-DNA-lzip	2.33	795	21	1.327	1.1705
DNA-Influenza-2019-04-27.one_line	1106180040	250	1	OST-DNA-lzip	1.9	698	20	1.5114	1.0022
DNA-Influenza-2019-04-27.one_line	1106180040	500	1	OST-DNA-lzip	1.52	612	11	1.7238	1.4577
DNA-Influenza-2019-04-27.one_line	1106180040	750	1	OST-DNA-lzip	1.42	540	10	1.9536	1.498
DNA-Influenza-2019-04-27.one_line	1106180040	1000	1	OST-DNA-lzip	1.37	522	9	2.0209	1.6058
DNA-Influenza-2019-04-27.one_line	1106180040	2500	1	OST-DNA-lzip	1.31	513	8	2.0564	1.7275
DNA-Influenza-2019-04-27.one_line	1106180040	5000	1	OST-DNA-lzip	1.3	545	8	1.9357	1.7143
DNA-Influenza-2019-04-27.one_line	1106180040	10000	1	OST-DNA-lzip	1.29	564	7	1.8705	1.9441
DNA-Influenza-2019-04-27.one_line	1106180040	25	2	OST-DNA-lzip	5.92	2595	143	0.4065	0.4367
DNA-Influenza-2019-04-27.one_line	1106180040	50	2	OST-DNA-lzip	4.41	1615	89	0.6532	0.5227
DNA-Influenza-2019-04-27.one_line	1106180040	100	2	OST-DNA-lzip	3.03	1067	31	0.9887	1.0311
DNA-Influenza-2019-04-27.one_line	1106180040	125	2	OST-DNA-lzip	2.68	918	40	1.1492	0.7068
DNA-Influenza-2019-04-27.one_line	1106180040	150	2	OST-DNA-lzip	2.42	853	22	1.2367	1.1604
DNA-Influenza-2019-04-27.one_line	1106180040	250	2	OST-DNA-lzip	1.94	665	16	1.5864	1.2791
DNA-Influenza-2019-04-27.one_line	1106180040	500	2	OST-DNA-lzip	1.54	572	11	1.8443	1.4769
DNA-Influenza-2019-04-27.one_line	1106180040	750	2	OST-DNA-lzip	1.43	526	10	2.0056	1.5086
DNA-Influenza-2019-04-27.one_line	1106180040	1000	2	OST-DNA-lzip	1.38	524	9	2.0132	1.6176
DNA-Influenza-2019-04-27.one_line	1106180040	2500	2	OST-DNA-lzip	1.32	521	8	2.0248	1.7406
DNA-Influenza-2019-04-27.one_line	1106180040	5000	2	OST-DNA-lzip	1.31	510	7	2.0685	1.9742
DNA-Influenza-2019-04-27.one_line	1106180040	10000	2	OST-DNA-lzip	1.32	507	7	2.0807	1.9893
DNA-Influenza-2019-04-27.one_line	1106180040	25	3	OST-DNA-lzip	5.97	2554	152	0.4131	0.4143
DNA-Influenza-2019-04-27.one_line	1106180040	50	3	OST-DNA-lzip	4.42	1563	63	0.6749	0.7401
DNA-Influenza-2019-04-27.one_line	1106180040	100	3	OST-DNA-lzip	3.04	984	31	1.0721	1.0345
DNA-Influenza-2019-04-27.one_line	1106180040	125	3	OST-DNA-lzip	2.68	919	28	1.1479	1.0097
DNA-Influenza-2019-04-27.one_line	1106180040	150	3	OST-DNA-lzip	2.42	839	23	1.2574	1.11
DNA-Influenza-2019-04-27.one_line	1106180040	250	3	OST-DNA-lzip	1.95	730	17	1.4451	1.2101
DNA-Influenza-2019-04-27.one_line	1106180040	500	3	OST-DNA-lzip	1.54	601	12	1.7553	1.3538
DNA-Influenza-2019-04-27.one_line	1106180040	750	3	OST-DNA-lzip	1.43	554	11	1.9042	1.3714
DNA-Influenza-2019-04-27.one_line	1106180040	1000	3	OST-DNA-lzip	1.38	631	10	1.6718	1.4558
DNA-Influenza-2019-04-27.one_line	1106180040	2500	3	OST-DNA-lzip	1.32	609	8	1.7322	1.7406
DNA-Influenza-2019-04-27.one_line	1106180040	5000	3	OST-DNA-lzip	1.32	588	8	1.7941	1.7406
DNA-Influenza-2019-04-27.one_line	1106180040	10000	3	OST-DNA-lzip	1.32	513	7	2.0564	1.9893
DNA-Influenza-2019-04-27.one_line	1106180040	25	4	OST-DNA-lzip	5.97	2791	207	0.378	0.3042
DNA-Influenza-2019-04-27.one_line	1106180040	50	4	OST-DNA-lzip	4.42	1602	64	0.6585	0.7286
DNA-Influenza-2019-04-27.one_line	1106180040	100	4	OST-DNA-lzip	3.04	949	31	1.1116	1.0345
DNA-Influenza-2019-04-27.one_line	1106180040	125	4	OST-DNA-lzip	2.68	877	26	1.2029	1.0874
DNA-Influenza-2019-04-27.one_line	1106180040	150	4	OST-DNA-lzip	2.42	815	23	1.2944	1.11
DNA-Influenza-2019-04-27.one_line	1106180040	250	4	OST-DNA-lzip	1.95	659	16	1.6008	1.2857
DNA-Influenza-2019-04-27.one_line	1106180040	500	4	OST-DNA-lzip	1.54	610	12	1.7294	1.3538
DNA-Influenza-2019-04-27.one_line	1106180040	750	4	OST-DNA-lzip	1.43	541	10	1.95	1.5086
DNA-Influenza-2019-04-27.one_line	1106180040	1000	4	OST-DNA-lzip	1.38	517	9	2.0405	1.6176
DNA-Influenza-2019-04-27.one_line	1106180040	2500	4	OST-DNA-lzip	1.32	485	8	2.1751	1.7406
DNA-Influenza-2019-04-27.one_line	1106180040	5000	4	OST-DNA-lzip	1.32	489	7	2.1573	1.9893
DNA-Influenza-2019-04-27.one_line	1106180040	10000	4	OST-DNA-lzip	1.32	477	7	2.2116	1.9893
DNA-Influenza-2019-04-27.one_line	1106180040	25	5	OST-DNA-lzip	5.97	2547	199	0.4142	0.3165
DNA-Influenza-2019-04-27.one_line	1106180040	50	5	OST-DNA-lzip	4.42	1539	80	0.6855	0.5829
DNA-Influenza-2019-04-27.one_line	1106180040	100	5	OST-DNA-lzip	3.04	1035	31	1.0193	1.0345
DNA-Influenza-2019-04-27.one_line	1106180040	125	5	OST-DNA-lzip	2.68	848	25	1.244	1.1309
DNA-Influenza-2019-04-27.one_line	1106180040	150	5	OST-DNA-lzip	2.42	808	23	1.3056	1.11
DNA-Influenza-2019-04-27.one_line	1106180040	250	5	OST-DNA-lzip	1.95	674	16	1.5652	1.2857
DNA-Influenza-2019-04-27.one_line	1106180040	500	5	OST-DNA-lzip	1.54	581	15	1.8157	1.0831
DNA-Influenza-2019-04-27.one_line	1106180040	750	5	OST-DNA-lzip	1.43	608	10	1.7351	1.5086
DNA-Influenza-2019-04-27.one_line	1106180040	1000	5	OST-DNA-lzip	1.38	545	9	1.9357	1.6176
DNA-Influenza-2019-04-27.one_line	1106180040	2500	5	OST-DNA-lzip	1.32	523	8	2.0171	1.7406
DNA-Influenza-2019-04-27.one_line	1106180040	5000	5	OST-DNA-lzip	1.32	482	9	2.1887	1.5472
DNA-Influenza-2019-04-27.one_line	1106180040	10000	5	OST-DNA-lzip	1.32	487	12	2.1662	1.1604
DNA-Influenza-2019-04-27.one_line	1106180040	25	1	OST-DNA-xz	4.66	2366	119	0.4459	0.4131
DNA-Influenza-2019-04-27.one_line	1106180040	50	1	OST-DNA-xz	3.49	1524	51	0.6922	0.7219
DNA-Influenza-2019-04-27.one_line	1106180040	100	1	OST-DNA-xz	2.6	998	32	1.057	0.8571
DNA-Influenza-2019-04-27.one_line	1106180040	125	1	OST-DNA-xz	2.32	850	25	1.2411	0.979
DNA-Influenza-2019-04-27.one_line	1106180040	150	1	OST-DNA-xz	2.11	757	19	1.3936	1.1715
DNA-Influenza-2019-04-27.one_line	1106180040	250	1	OST-DNA-xz	1.72	600	15	1.7582	1.2097
DNA-Influenza-2019-04-27.one_line	1106180040	500	1	OST-DNA-xz	1.37	543	9	1.9428	1.6058
DNA-Influenza-2019-04-27.one_line	1106180040	750	1	OST-DNA-xz	1.28	496	8	2.1269	1.6879
DNA-Influenza-2019-04-27.one_line	1106180040	1000	1	OST-DNA-xz	1.23	464	7	2.2736	1.8537
DNA-Influenza-2019-04-27.one_line	1106180040	2500	1	OST-DNA-xz	1.18	429	6	2.4591	2.0747
DNA-Influenza-2019-04-27.one_line	1106180040	5000	1	OST-DNA-xz	1.17	429	5	2.4591	2.4685
DNA-Influenza-2019-04-27.one_line	1106180040	10000	1	OST-DNA-xz	1.17	431	6	2.4476	2.0571
DNA-Influenza-2019-04-27.one_line	1106180040	25	2	OST-DNA-xz	5.36	2694	143	0.3916	0.3954
DNA-Influenza-2019-04-27.one_line	1106180040	50	2	OST-DNA-xz	3.77	1571	74	0.6715	0.5374
DNA-Influenza-2019-04-27.one_line	1106180040	100	2	OST-DNA-xz	2.74	1025	28	1.0292	1.0323
DNA-Influenza-2019-04-27.one_line	1106180040	125	2	OST-DNA-xz	2.42	887	23	1.1893	1.11
DNA-Influenza-2019-04-27.one_line	1106180040	150	2	OST-DNA-xz	2.19	786	27	1.3422	0.8557
DNA-Influenza-2019-04-27.one_line	1106180040	250	2	OST-DNA-xz	1.76	650	21	1.623	0.8841
DNA-Influenza-2019-04-27.one_line	1106180040	500	2	OST-DNA-xz	1.39	542	9	1.9464	1.6293
DNA-Influenza-2019-04-27.one_line	1106180040	750	2	OST-DNA-xz	1.29	469	8	2.2493	1.7011
DNA-Influenza-2019-04-27.one_line	1106180040	1000	2	OST-DNA-xz	1.24	464	7	2.2736	1.8687
DNA-Influenza-2019-04-27.one_line	1106180040	2500	2	OST-DNA-xz	1.19	415	6	2.542	2.0923
DNA-Influenza-2019-04-27.one_line	1106180040	5000	2	OST-DNA-xz	1.18	419	5	2.5177	2.4896
DNA-Influenza-2019-04-27.one_line	1106180040	10000	2	OST-DNA-xz	1.19	434	5	2.4307	2.5107
DNA-Influenza-2019-04-27.one_line	1106180040	25	3	OST-DNA-xz	5.41	2484	146	0.4247	0.3909
DNA-Influenza-2019-04-27.one_line	1106180040	50	3	OST-DNA-xz	3.77	1496	59	0.7052	0.6741
DNA-Influenza-2019-04-27.one_line	1106180040	100	3	OST-DNA-xz	2.75	975	30	1.082	0.967
DNA-Influenza-2019-04-27.one_line	1106180040	125	3	OST-DNA-xz	2.43	906	33	1.1644	0.7768
DNA-Influenza-2019-04-27.one_line	1106180040	150	3	OST-DNA-xz	2.19	754	20	1.3991	1.1552
DNA-Influenza-2019-04-27.one_line	1106180040	250	3	OST-DNA-xz	1.76	689	15	1.5311	1.2378
DNA-Influenza-2019-04-27.one_line	1106180040	500	3	OST-DNA-xz	1.39	513	10	2.0564	1.4664
DNA-Influenza-2019-04-27.one_line	1106180040	750	3	OST-DNA-xz	1.29	485	8	2.1751	1.7011
DNA-Influenza-2019-04-27.one_line	1106180040	1000	3	OST-DNA-xz	1.25	512	7	2.0604	1.8838
DNA-Influenza-2019-04-27.one_line	1106180040	2500	3	OST-DNA-xz	1.19	437	6	2.414	2.0923
DNA-Influenza-2019-04-27.one_line	1106180040	5000	3	OST-DNA-xz	1.19	459	7	2.2983	1.7934
DNA-Influenza-2019-04-27.one_line	1106180040	10000	3	OST-DNA-xz	1.19	437	5	2.414	2.5107
DNA-Influenza-2019-04-27.one_line	1106180040	25	4	OST-DNA-xz	5.41	2820	146	0.3741	0.3909
DNA-Influenza-2019-04-27.one_line	1106180040	50	4	OST-DNA-xz	3.77	1719	67	0.6137	0.5936
DNA-Influenza-2019-04-27.one_line	1106180040	100	4	OST-DNA-xz	2.75	1034	47	1.0202	0.6172
DNA-Influenza-2019-04-27.one_line	1106180040	125	4	OST-DNA-xz	2.43	891	24	1.184	1.0681
DNA-Influenza-2019-04-27.one_line	1106180040	150	4	OST-DNA-xz	2.19	741	20	1.4237	1.1552
DNA-Influenza-2019-04-27.one_line	1106180040	250	4	OST-DNA-xz	1.76	598	14	1.7641	1.3262
DNA-Influenza-2019-04-27.one_line	1106180040	500	4	OST-DNA-xz	1.39	503	10	2.0973	1.4664
DNA-Influenza-2019-04-27.one_line	1106180040	750	4	OST-DNA-xz	1.29	470	8	2.2445	1.7011
DNA-Influenza-2019-04-27.one_line	1106180040	1000	4	OST-DNA-xz	1.25	469	7	2.2493	1.8838
DNA-Influenza-2019-04-27.one_line	1106180040	2500	4	OST-DNA-xz	1.19	431	6	2.4476	2.0923
DNA-Influenza-2019-04-27.one_line	1106180040	5000	4	OST-DNA-xz	1.19	424	5	2.4881	2.5107
DNA-Influenza-2019-04-27.one_line	1106180040	10000	4	OST-DNA-xz	1.19	450	5	2.3443	2.5107
DNA-Influenza-2019-04-27.one_line	1106180040	25	5	OST-DNA-xz	5.41	2463	143	0.4283	0.3991
DNA-Influenza-2019-04-27.one_line	1106180040	50	5	OST-DNA-xz	3.77	1486	60	0.7099	0.6629
DNA-Influenza-2019-04-27.one_line	1106180040	100	5	OST-DNA-xz	2.75	942	32	1.1199	0.9066
DNA-Influenza-2019-04-27.one_line	1106180040	125	5	OST-DNA-xz	2.43	879	24	1.2002	1.0681
DNA-Influenza-2019-04-27.one_line	1106180040	150	5	OST-DNA-xz	2.19	791	22	1.3337	1.0501
DNA-Influenza-2019-04-27.one_line	1106180040	250	5	OST-DNA-xz	1.76	605	14	1.7437	1.3262
DNA-Influenza-2019-04-27.one_line	1106180040	500	5	OST-DNA-xz	1.39	488	10	2.1618	1.4664
DNA-Influenza-2019-04-27.one_line	1106180040	750	5	OST-DNA-xz	1.29	456	8	2.3135	1.7011
DNA-Influenza-2019-04-27.one_line	1106180040	1000	5	OST-DNA-xz	1.25	440	7	2.3976	1.8838
DNA-Influenza-2019-04-27.one_line	1106180040	2500	5	OST-DNA-xz	1.19	441	6	2.3921	2.0923
DNA-Influenza-2019-04-27.one_line	1106180040	5000	5	OST-DNA-xz	1.19	419	5	2.5177	2.5107
DNA-Influenza-2019-04-27.one_line	1106180040	10000	5	OST-DNA-xz	1.19	443	5	2.3813	2.5107
DNA-Genome-Strongylocentrotus-purpuratus-GCF_000002235.4-2015-03-10.one_line	659082267	25	1	OST-DNA-bcm	21.92	1174	218	0.5354	0.632
DNA-Genome-Strongylocentrotus-purpuratus-GCF_000002235.4-2015-03-10.one_line	659082267	50	1	OST-DNA-bcm	21.53	745	190	0.8437	0.7122
DNA-Genome-Strongylocentrotus-purpuratus-GCF_000002235.4-2015-03-10.one_line	659082267	100	1	OST-DNA-bcm	21.34	509	159	1.2349	0.8436
DNA-Genome-Strongylocentrotus-purpuratus-GCF_000002235.4-2015-03-10.one_line	659082267	125	1	OST-DNA-bcm	21.31	467	160	1.3459	0.8371
DNA-Genome-Strongylocentrotus-purpuratus-GCF_000002235.4-2015-03-10.one_line	659082267	150	1	OST-DNA-bcm	21.29	430	162	1.4617	0.826
DNA-Genome-Strongylocentrotus-purpuratus-GCF_000002235.4-2015-03-10.one_line	659082267	250	1	OST-DNA-bcm	21.25	329	154	1.9105	0.8673
DNA-Genome-Strongylocentrotus-purpuratus-GCF_000002235.4-2015-03-10.one_line	659082267	500	1	OST-DNA-bcm	21.23	277	145	2.2691	0.9203
DNA-Genome-Strongylocentrotus-purpuratus-GCF_000002235.4-2015-03-10.one_line	659082267	750	1	OST-DNA-bcm	21.22	266	142	2.363	0.9393
DNA-Genome-Strongylocentrotus-purpuratus-GCF_000002235.4-2015-03-10.one_line	659082267	1000	1	OST-DNA-bcm	21.22	249	149	2.5243	0.8952
DNA-Genome-Strongylocentrotus-purpuratus-GCF_000002235.4-2015-03-10.one_line	659082267	2500	1	OST-DNA-bcm	21.22	240	145	2.619	0.9199
DNA-Genome-Strongylocentrotus-purpuratus-GCF_000002235.4-2015-03-10.one_line	659082267	5000	1	OST-DNA-bcm	21.22	224	151	2.806	0.8833
DNA-Genome-Strongylocentrotus-purpuratus-GCF_000002235.4-2015-03-10.one_line	659082267	10000	1	OST-DNA-bcm	21.22	237	146	2.6521	0.9135
DNA-Genome-Strongylocentrotus-purpuratus-GCF_000002235.4-2015-03-10.one_line	659082267	25	2	OST-DNA-bcm	22.04	1208	232	0.5203	0.5971
DNA-Genome-Strongylocentrotus-purpuratus-GCF_000002235.4-2015-03-10.one_line	659082267	50	2	OST-DNA-bcm	21.53	746	192	0.8426	0.7048
DNA-Genome-Strongylocentrotus-purpuratus-GCF_000002235.4-2015-03-10.one_line	659082267	100	2	OST-DNA-bcm	21.33	595	181	1.0564	0.7407
DNA-Genome-Strongylocentrotus-purpuratus-GCF_000002235.4-2015-03-10.one_line	659082267	125	2	OST-DNA-bcm	21.29	434	153	1.4483	0.8746
DNA-Genome-Strongylocentrotus-purpuratus-GCF_000002235.4-2015-03-10.one_line	659082267	150	2	OST-DNA-bcm	21.28	402	159	1.5636	0.8412
DNA-Genome-Strongylocentrotus-purpuratus-GCF_000002235.4-2015-03-10.one_line	659082267	250	2	OST-DNA-bcm	21.25	342	148	1.8379	0.9025
DNA-Genome-Strongylocentrotus-purpuratus-GCF_000002235.4-2015-03-10.one_line	659082267	500	2	OST-DNA-bcm	21.23	305	150	2.0608	0.8896
DNA-Genome-Strongylocentrotus-purpuratus-GCF_000002235.4-2015-03-10.one_line	659082267	750	2	OST-DNA-bcm	21.23	292	145	2.1526	0.9203
DNA-Genome-Strongylocentrotus-purpuratus-GCF_000002235.4-2015-03-10.one_line	659082267	1000	2	OST-DNA-bcm	21.23	266	142	2.363	0.9397
DNA-Genome-Strongylocentrotus-purpuratus-GCF_000002235.4-2015-03-10.one_line	659082267	2500	2	OST-DNA-bcm	21.24	288	145	2.1825	0.9207
DNA-Genome-Strongylocentrotus-purpuratus-GCF_000002235.4-2015-03-10.one_line	659082267	5000	2	OST-DNA-bcm	21.24	248	143	2.5345	0.9336
DNA-Genome-Strongylocentrotus-purpuratus-GCF_000002235.4-2015-03-10.one_line	659082267	10000	2	OST-DNA-bcm	21.23	242	153	2.5973	0.8722
DNA-Genome-Strongylocentrotus-purpuratus-GCF_000002235.4-2015-03-10.one_line	659082267	25	3	OST-DNA-bcm	22.05	1467	233	0.4285	0.5948
DNA-Genome-Strongylocentrotus-purpuratus-GCF_000002235.4-2015-03-10.one_line	659082267	50	3	OST-DNA-bcm	21.53	791	181	0.7946	0.7477
DNA-Genome-Strongylocentrotus-purpuratus-GCF_000002235.4-2015-03-10.one_line	659082267	100	3	OST-DNA-bcm	21.33	484	158	1.2987	0.8485
DNA-Genome-Strongylocentrotus-purpuratus-GCF_000002235.4-2015-03-10.one_line	659082267	125	3	OST-DNA-bcm	21.3	439	156	1.4318	0.8582
DNA-Genome-Strongylocentrotus-purpuratus-GCF_000002235.4-2015-03-10.one_line	659082267	150	3	OST-DNA-bcm	21.28	416	150	1.5109	0.8917
DNA-Genome-Strongylocentrotus-purpuratus-GCF_000002235.4-2015-03-10.one_line	659082267	250	3	OST-DNA-bcm	21.25	354	146	1.7756	0.9148
DNA-Genome-Strongylocentrotus-purpuratus-GCF_000002235.4-2015-03-10.one_line	659082267	500	3	OST-DNA-bcm	21.24	306	156	2.0541	0.8558
DNA-Genome-Strongylocentrotus-purpuratus-GCF_000002235.4-2015-03-10.one_line	659082267	750	3	OST-DNA-bcm	21.24	298	156	2.1092	0.8558
DNA-Genome-Strongylocentrotus-purpuratus-GCF_000002235.4-2015-03-10.one_line	659082267	1000	3	OST-DNA-bcm	21.24	279	151	2.2529	0.8841
DNA-Genome-Strongylocentrotus-purpuratus-GCF_000002235.4-2015-03-10.one_line	659082267	2500	3	OST-DNA-bcm	21.24	264	151	2.3809	0.8841
DNA-Genome-Strongylocentrotus-purpuratus-GCF_000002235.4-2015-03-10.one_line	659082267	5000	3	OST-DNA-bcm	21.24	246	149	2.5551	0.896
DNA-Genome-Strongylocentrotus-purpuratus-GCF_000002235.4-2015-03-10.one_line	659082267	10000	3	OST-DNA-bcm	21.23	244	150	2.576	0.8896
DNA-Genome-Strongylocentrotus-purpuratus-GCF_000002235.4-2015-03-10.one_line	659082267	25	4	OST-DNA-bcm	22.04	1215	233	0.5173	0.5946
DNA-Genome-Strongylocentrotus-purpuratus-GCF_000002235.4-2015-03-10.one_line	659082267	50	4	OST-DNA-bcm	21.53	741	194	0.8482	0.6976
DNA-Genome-Strongylocentrotus-purpuratus-GCF_000002235.4-2015-03-10.one_line	659082267	100	4	OST-DNA-bcm	21.32	515	162	1.2205	0.8272
DNA-Genome-Strongylocentrotus-purpuratus-GCF_000002235.4-2015-03-10.one_line	659082267	125	4	OST-DNA-bcm	21.29	452	159	1.3906	0.8416
DNA-Genome-Strongylocentrotus-purpuratus-GCF_000002235.4-2015-03-10.one_line	659082267	150	4	OST-DNA-bcm	21.27	427	155	1.472	0.8625
DNA-Genome-Strongylocentrotus-purpuratus-GCF_000002235.4-2015-03-10.one_line	659082267	250	4	OST-DNA-bcm	21.25	349	149	1.801	0.8964
DNA-Genome-Strongylocentrotus-purpuratus-GCF_000002235.4-2015-03-10.one_line	659082267	500	4	OST-DNA-bcm	21.24	292	145	2.1526	0.9207
DNA-Genome-Strongylocentrotus-purpuratus-GCF_000002235.4-2015-03-10.one_line	659082267	750	4	OST-DNA-bcm	21.24	326	155	1.9281	0.8613
DNA-Genome-Strongylocentrotus-purpuratus-GCF_000002235.4-2015-03-10.one_line	659082267	1000	4	OST-DNA-bcm	21.24	285	143	2.2054	0.9336
DNA-Genome-Strongylocentrotus-purpuratus-GCF_000002235.4-2015-03-10.one_line	659082267	2500	4	OST-DNA-bcm	21.24	256	146	2.4553	0.9144
DNA-Genome-Strongylocentrotus-purpuratus-GCF_000002235.4-2015-03-10.one_line	659082267	5000	4	OST-DNA-bcm	21.24	255	145	2.4649	0.9207
DNA-Genome-Strongylocentrotus-purpuratus-GCF_000002235.4-2015-03-10.one_line	659082267	10000	4	OST-DNA-bcm	21.23	240	144	2.619	0.9267
DNA-Genome-Strongylocentrotus-purpuratus-GCF_000002235.4-2015-03-10.one_line	659082267	25	5	OST-DNA-bcm	22.04	1198	226	0.5247	0.613
DNA-Genome-Strongylocentrotus-purpuratus-GCF_000002235.4-2015-03-10.one_line	659082267	50	5	OST-DNA-bcm	21.53	738	181	0.8517	0.7477
DNA-Genome-Strongylocentrotus-purpuratus-GCF_000002235.4-2015-03-10.one_line	659082267	100	5	OST-DNA-bcm	21.32	492	155	1.2775	0.8646
DNA-Genome-Strongylocentrotus-purpuratus-GCF_000002235.4-2015-03-10.one_line	659082267	125	5	OST-DNA-bcm	21.29	450	151	1.3968	0.8862
DNA-Genome-Strongylocentrotus-purpuratus-GCF_000002235.4-2015-03-10.one_line	659082267	150	5	OST-DNA-bcm	21.27	420	157	1.4965	0.8515
DNA-Genome-Strongylocentrotus-purpuratus-GCF_000002235.4-2015-03-10.one_line	659082267	250	5	OST-DNA-bcm	21.25	351	149	1.7907	0.8964
DNA-Genome-Strongylocentrotus-purpuratus-GCF_000002235.4-2015-03-10.one_line	659082267	500	5	OST-DNA-bcm	21.24	294	142	2.1379	0.9402
DNA-Genome-Strongylocentrotus-purpuratus-GCF_000002235.4-2015-03-10.one_line	659082267	750	5	OST-DNA-bcm	21.24	270	132	2.328	1.0114
DNA-Genome-Strongylocentrotus-purpuratus-GCF_000002235.4-2015-03-10.one_line	659082267	1000	5	OST-DNA-bcm	21.24	259	137	2.4268	0.9745
DNA-Genome-Strongylocentrotus-purpuratus-GCF_000002235.4-2015-03-10.one_line	659082267	2500	5	OST-DNA-bcm	21.24	249	128	2.5243	1.043
DNA-Genome-Strongylocentrotus-purpuratus-GCF_000002235.4-2015-03-10.one_line	659082267	5000	5	OST-DNA-bcm	21.24	238	139	2.641	0.9605
DNA-Genome-Strongylocentrotus-purpuratus-GCF_000002235.4-2015-03-10.one_line	659082267	10000	5	OST-DNA-bcm	21.23	235	143	2.6747	0.9332
DNA-Genome-Strongylocentrotus-purpuratus-GCF_000002235.4-2015-03-10.one_line	659082267	25	1	OST-DNA-brotli	23.31	3615	95	0.1739	1.5423
DNA-Genome-Strongylocentrotus-purpuratus-GCF_000002235.4-2015-03-10.one_line	659082267	50	1	OST-DNA-brotli	22.56	3093	49	0.2032	2.8939
DNA-Genome-Strongylocentrotus-purpuratus-GCF_000002235.4-2015-03-10.one_line	659082267	100	1	OST-DNA-brotli	22.17	2946	39	0.2134	3.5731
DNA-Genome-Strongylocentrotus-purpuratus-GCF_000002235.4-2015-03-10.one_line	659082267	125	1	OST-DNA-brotli	22.1	2820	28	0.2229	4.9611
DNA-Genome-Strongylocentrotus-purpuratus-GCF_000002235.4-2015-03-10.one_line	659082267	150	1	OST-DNA-brotli	22.04	2932	36	0.2144	3.8481
DNA-Genome-Strongylocentrotus-purpuratus-GCF_000002235.4-2015-03-10.one_line	659082267	250	1	OST-DNA-brotli	21.95	2757	21	0.228	6.5698
DNA-Genome-Strongylocentrotus-purpuratus-GCF_000002235.4-2015-03-10.one_line	659082267	500	1	OST-DNA-brotli	21.88	2680	21	0.2345	6.5489
DNA-Genome-Strongylocentrotus-purpuratus-GCF_000002235.4-2015-03-10.one_line	659082267	750	1	OST-DNA-brotli	21.86	2616	19	0.2403	7.2316
DNA-Genome-Strongylocentrotus-purpuratus-GCF_000002235.4-2015-03-10.one_line	659082267	1000	1	OST-DNA-brotli	21.86	2638	18	0.2383	7.6334
DNA-Genome-Strongylocentrotus-purpuratus-GCF_000002235.4-2015-03-10.one_line	659082267	2500	1	OST-DNA-brotli	21.86	2563	17	0.2452	8.0824
DNA-Genome-Strongylocentrotus-purpuratus-GCF_000002235.4-2015-03-10.one_line	659082267	5000	1	OST-DNA-brotli	21.85	2525	17	0.2489	8.0787
DNA-Genome-Strongylocentrotus-purpuratus-GCF_000002235.4-2015-03-10.one_line	659082267	10000	1	OST-DNA-brotli	21.84	2626	16	0.2394	8.5797
DNA-Genome-Strongylocentrotus-purpuratus-GCF_000002235.4-2015-03-10.one_line	659082267	25	2	OST-DNA-brotli	23.34	3381	104	0.1859	1.4106
DNA-Genome-Strongylocentrotus-purpuratus-GCF_000002235.4-2015-03-10.one_line	659082267	50	2	OST-DNA-brotli	22.51	2907	54	0.2162	2.6201
DNA-Genome-Strongylocentrotus-purpuratus-GCF_000002235.4-2015-03-10.one_line	659082267	100	2	OST-DNA-brotli	22.16	2670	34	0.2354	4.0967
DNA-Genome-Strongylocentrotus-purpuratus-GCF_000002235.4-2015-03-10.one_line	659082267	125	2	OST-DNA-brotli	22.1	2668	31	0.2356	4.481
DNA-Genome-Strongylocentrotus-purpuratus-GCF_000002235.4-2015-03-10.one_line	659082267	150	2	OST-DNA-brotli	22.07	2643	27	0.2378	5.1378
DNA-Genome-Strongylocentrotus-purpuratus-GCF_000002235.4-2015-03-10.one_line	659082267	250	2	OST-DNA-brotli	22.04	2604	23	0.2414	6.0231
DNA-Genome-Strongylocentrotus-purpuratus-GCF_000002235.4-2015-03-10.one_line	659082267	500	2	OST-DNA-brotli	22.03	2600	20	0.2417	6.9235
DNA-Genome-Strongylocentrotus-purpuratus-GCF_000002235.4-2015-03-10.one_line	659082267	750	2	OST-DNA-brotli	22.06	2547	20	0.2468	6.9329
DNA-Genome-Strongylocentrotus-purpuratus-GCF_000002235.4-2015-03-10.one_line	659082267	1000	2	OST-DNA-brotli	22.08	2547	18	0.2468	7.7102
DNA-Genome-Strongylocentrotus-purpuratus-GCF_000002235.4-2015-03-10.one_line	659082267	2500	2	OST-DNA-brotli	22.15	2534	17	0.248	8.1896
DNA-Genome-Strongylocentrotus-purpuratus-GCF_000002235.4-2015-03-10.one_line	659082267	5000	2	OST-DNA-brotli	22.14	2576	17	0.244	8.1859
DNA-Genome-Strongylocentrotus-purpuratus-GCF_000002235.4-2015-03-10.one_line	659082267	10000	2	OST-DNA-brotli	22.05	2522	16	0.2492	8.6622
DNA-Genome-Strongylocentrotus-purpuratus-GCF_000002235.4-2015-03-10.one_line	659082267	25	3	OST-DNA-brotli	23.34	3383	107	0.1858	1.3711
DNA-Genome-Strongylocentrotus-purpuratus-GCF_000002235.4-2015-03-10.one_line	659082267	50	3	OST-DNA-brotli	22.51	3011	56	0.2088	2.5265
DNA-Genome-Strongylocentrotus-purpuratus-GCF_000002235.4-2015-03-10.one_line	659082267	100	3	OST-DNA-brotli	22.17	2952	34	0.2129	4.0985
DNA-Genome-Strongylocentrotus-purpuratus-GCF_000002235.4-2015-03-10.one_line	659082267	125	3	OST-DNA-brotli	22.12	2916	30	0.2156	4.6345
DNA-Genome-Strongylocentrotus-purpuratus-GCF_000002235.4-2015-03-10.one_line	659082267	150	3	OST-DNA-brotli	22.08	2883	28	0.218	4.9566
DNA-Genome-Strongylocentrotus-purpuratus-GCF_000002235.4-2015-03-10.one_line	659082267	250	3	OST-DNA-brotli	22.05	2798	30	0.2246	4.6198
DNA-Genome-Strongylocentrotus-purpuratus-GCF_000002235.4-2015-03-10.one_line	659082267	500	3	OST-DNA-brotli	22.05	2832	20	0.2219	6.9298
DNA-Genome-Strongylocentrotus-purpuratus-GCF_000002235.4-2015-03-10.one_line	659082267	750	3	OST-DNA-brotli	22.08	2767	20	0.2272	6.9392
DNA-Genome-Strongylocentrotus-purpuratus-GCF_000002235.4-2015-03-10.one_line	659082267	1000	3	OST-DNA-brotli	22.1	2638	19	0.2383	7.311
DNA-Genome-Strongylocentrotus-purpuratus-GCF_000002235.4-2015-03-10.one_line	659082267	2500	3	OST-DNA-brotli	22.18	2678	20	0.2347	6.9706
DNA-Genome-Strongylocentrotus-purpuratus-GCF_000002235.4-2015-03-10.one_line	659082267	5000	3	OST-DNA-brotli	22.18	2722	18	0.2309	7.7451
DNA-Genome-Strongylocentrotus-purpuratus-GCF_000002235.4-2015-03-10.one_line	659082267	10000	3	OST-DNA-brotli	22.1	2768	17	0.2271	8.1711
DNA-Genome-Strongylocentrotus-purpuratus-GCF_000002235.4-2015-03-10.one_line	659082267	25	4	OST-DNA-brotli	21.69	3866	104	0.1626	1.3109
DNA-Genome-Strongylocentrotus-purpuratus-GCF_000002235.4-2015-03-10.one_line	659082267	50	4	OST-DNA-brotli	20.76	3306	51	0.1901	2.5586
DNA-Genome-Strongylocentrotus-purpuratus-GCF_000002235.4-2015-03-10.one_line	659082267	100	4	OST-DNA-brotli	20.39	2839	27	0.2214	4.7467
DNA-Genome-Strongylocentrotus-purpuratus-GCF_000002235.4-2015-03-10.one_line	659082267	125	4	OST-DNA-brotli	20.34	2752	23	0.2284	5.5586
DNA-Genome-Strongylocentrotus-purpuratus-GCF_000002235.4-2015-03-10.one_line	659082267	150	4	OST-DNA-brotli	20.33	2732	20	0.2301	6.3892
DNA-Genome-Strongylocentrotus-purpuratus-GCF_000002235.4-2015-03-10.one_line	659082267	250	4	OST-DNA-brotli	20.35	2671	17	0.2353	7.5241
DNA-Genome-Strongylocentrotus-purpuratus-GCF_000002235.4-2015-03-10.one_line	659082267	500	4	OST-DNA-brotli	20.49	2693	14	0.2334	9.1993
DNA-Genome-Strongylocentrotus-purpuratus-GCF_000002235.4-2015-03-10.one_line	659082267	750	4	OST-DNA-brotli	20.63	2663	15	0.236	8.6447
DNA-Genome-Strongylocentrotus-purpuratus-GCF_000002235.4-2015-03-10.one_line	659082267	1000	4	OST-DNA-brotli	20.74	2613	15	0.2405	8.6907
DNA-Genome-Strongylocentrotus-purpuratus-GCF_000002235.4-2015-03-10.one_line	659082267	2500	4	OST-DNA-brotli	21.16	2562	16	0.2453	8.3126
DNA-Genome-Strongylocentrotus-purpuratus-GCF_000002235.4-2015-03-10.one_line	659082267	5000	4	OST-DNA-brotli	21.45	2568	16	0.2448	8.4265
DNA-Genome-Strongylocentrotus-purpuratus-GCF_000002235.4-2015-03-10.one_line	659082267	10000	4	OST-DNA-brotli	21.66	2642	16	0.2379	8.509
DNA-Genome-Strongylocentrotus-purpuratus-GCF_000002235.4-2015-03-10.one_line	659082267	25	5	OST-DNA-brotli	21.69	3521	111	0.1785	1.2282
DNA-Genome-Strongylocentrotus-purpuratus-GCF_000002235.4-2015-03-10.one_line	659082267	50	5	OST-DNA-brotli	20.76	3048	49	0.2062	2.663
DNA-Genome-Strongylocentrotus-purpuratus-GCF_000002235.4-2015-03-10.one_line	659082267	100	5	OST-DNA-brotli	20.39	2874	28	0.2187	4.5772
DNA-Genome-Strongylocentrotus-purpuratus-GCF_000002235.4-2015-03-10.one_line	659082267	125	5	OST-DNA-brotli	20.34	2754	23	0.2282	5.5586
DNA-Genome-Strongylocentrotus-purpuratus-GCF_000002235.4-2015-03-10.one_line	659082267	150	5	OST-DNA-brotli	20.33	2789	21	0.2254	6.085
DNA-Genome-Strongylocentrotus-purpuratus-GCF_000002235.4-2015-03-10.one_line	659082267	250	5	OST-DNA-brotli	20.35	2679	16	0.2346	7.9944
DNA-Genome-Strongylocentrotus-purpuratus-GCF_000002235.4-2015-03-10.one_line	659082267	500	5	OST-DNA-brotli	20.49	2692	15	0.2335	8.586
DNA-Genome-Strongylocentrotus-purpuratus-GCF_000002235.4-2015-03-10.one_line	659082267	750	5	OST-DNA-brotli	20.63	2641	15	0.238	8.6447
DNA-Genome-Strongylocentrotus-purpuratus-GCF_000002235.4-2015-03-10.one_line	659082267	1000	5	OST-DNA-brotli	20.74	2863	22	0.2195	5.9255
DNA-Genome-Strongylocentrotus-purpuratus-GCF_000002235.4-2015-03-10.one_line	659082267	2500	5	OST-DNA-brotli	21.16	3480	15	0.1806	8.8667
DNA-Genome-Strongylocentrotus-purpuratus-GCF_000002235.4-2015-03-10.one_line	659082267	5000	5	OST-DNA-brotli	21.45	2607	15	0.2411	8.9883
DNA-Genome-Strongylocentrotus-purpuratus-GCF_000002235.4-2015-03-10.one_line	659082267	10000	5	OST-DNA-brotli	21.66	2509	16	0.2505	8.509
DNA-Genome-Strongylocentrotus-purpuratus-GCF_000002235.4-2015-03-10.one_line	659082267	25	1	OST-DNA-bsc	22.19	1129	133	0.5567	1.0487
DNA-Genome-Strongylocentrotus-purpuratus-GCF_000002235.4-2015-03-10.one_line	659082267	50	1	OST-DNA-bsc	21.72	657	94	0.9567	1.4524
DNA-Genome-Strongylocentrotus-purpuratus-GCF_000002235.4-2015-03-10.one_line	659082267	100	1	OST-DNA-bsc	21.47	425	75	1.4789	1.7993
DNA-Genome-Strongylocentrotus-purpuratus-GCF_000002235.4-2015-03-10.one_line	659082267	125	1	OST-DNA-bsc	21.42	391	73	1.6075	1.8443
DNA-Genome-Strongylocentrotus-purpuratus-GCF_000002235.4-2015-03-10.one_line	659082267	150	1	OST-DNA-bsc	21.38	356	72	1.7656	1.8664
DNA-Genome-Strongylocentrotus-purpuratus-GCF_000002235.4-2015-03-10.one_line	659082267	250	1	OST-DNA-bsc	21.32	294	68	2.1379	1.9707
DNA-Genome-Strongylocentrotus-purpuratus-GCF_000002235.4-2015-03-10.one_line	659082267	500	1	OST-DNA-bsc	21.29	244	65	2.576	2.0587
DNA-Genome-Strongylocentrotus-purpuratus-GCF_000002235.4-2015-03-10.one_line	659082267	750	1	OST-DNA-bsc	21.28	234	63	2.6861	2.1231
DNA-Genome-Strongylocentrotus-purpuratus-GCF_000002235.4-2015-03-10.one_line	659082267	1000	1	OST-DNA-bsc	21.28	222	63	2.8313	2.1231
DNA-Genome-Strongylocentrotus-purpuratus-GCF_000002235.4-2015-03-10.one_line	659082267	2500	1	OST-DNA-bsc	21.28	201	60	3.1271	2.2293
DNA-Genome-Strongylocentrotus-purpuratus-GCF_000002235.4-2015-03-10.one_line	659082267	5000	1	OST-DNA-bsc	21.27	201	62	3.1271	2.1563
DNA-Genome-Strongylocentrotus-purpuratus-GCF_000002235.4-2015-03-10.one_line	659082267	10000	1	OST-DNA-bsc	21.27	194	61	3.2399	2.1917
DNA-Genome-Strongylocentrotus-purpuratus-GCF_000002235.4-2015-03-10.one_line	659082267	25	2	OST-DNA-bsc	22.35	1122	149	0.5602	0.9428
DNA-Genome-Strongylocentrotus-purpuratus-GCF_000002235.4-2015-03-10.one_line	659082267	50	2	OST-DNA-bsc	21.74	670	100	0.9381	1.3665
DNA-Genome-Strongylocentrotus-purpuratus-GCF_000002235.4-2015-03-10.one_line	659082267	100	2	OST-DNA-bsc	21.46	443	80	1.4188	1.6861
DNA-Genome-Strongylocentrotus-purpuratus-GCF_000002235.4-2015-03-10.one_line	659082267	125	2	OST-DNA-bsc	21.42	396	76	1.5872	1.7715
DNA-Genome-Strongylocentrotus-purpuratus-GCF_000002235.4-2015-03-10.one_line	659082267	150	2	OST-DNA-bsc	21.39	361	72	1.7411	1.8673
DNA-Genome-Strongylocentrotus-purpuratus-GCF_000002235.4-2015-03-10.one_line	659082267	250	2	OST-DNA-bsc	21.34	287	68	2.1901	1.9725
DNA-Genome-Strongylocentrotus-purpuratus-GCF_000002235.4-2015-03-10.one_line	659082267	500	2	OST-DNA-bsc	21.32	250	66	2.5142	2.0304
DNA-Genome-Strongylocentrotus-purpuratus-GCF_000002235.4-2015-03-10.one_line	659082267	750	2	OST-DNA-bsc	21.32	236	64	2.6633	2.0939
DNA-Genome-Strongylocentrotus-purpuratus-GCF_000002235.4-2015-03-10.one_line	659082267	1000	2	OST-DNA-bsc	21.32	227	63	2.7689	2.1271
DNA-Genome-Strongylocentrotus-purpuratus-GCF_000002235.4-2015-03-10.one_line	659082267	2500	2	OST-DNA-bsc	21.32	209	62	3.0074	2.1614
DNA-Genome-Strongylocentrotus-purpuratus-GCF_000002235.4-2015-03-10.one_line	659082267	5000	2	OST-DNA-bsc	21.32	206	62	3.0512	2.1614
DNA-Genome-Strongylocentrotus-purpuratus-GCF_000002235.4-2015-03-10.one_line	659082267	10000	2	OST-DNA-bsc	21.3	206	61	3.0512	2.1948
DNA-Genome-Strongylocentrotus-purpuratus-GCF_000002235.4-2015-03-10.one_line	659082267	25	3	OST-DNA-bsc	22.35	1147	154	0.548	0.9122
DNA-Genome-Strongylocentrotus-purpuratus-GCF_000002235.4-2015-03-10.one_line	659082267	50	3	OST-DNA-bsc	21.74	677	101	0.9284	1.3529
DNA-Genome-Strongylocentrotus-purpuratus-GCF_000002235.4-2015-03-10.one_line	659082267	100	3	OST-DNA-bsc	21.47	452	81	1.3906	1.666
DNA-Genome-Strongylocentrotus-purpuratus-GCF_000002235.4-2015-03-10.one_line	659082267	125	3	OST-DNA-bsc	21.42	403	76	1.5597	1.7715
DNA-Genome-Strongylocentrotus-purpuratus-GCF_000002235.4-2015-03-10.one_line	659082267	150	3	OST-DNA-bsc	21.39	370	73	1.6988	1.8417
DNA-Genome-Strongylocentrotus-purpuratus-GCF_000002235.4-2015-03-10.one_line	659082267	250	3	OST-DNA-bsc	21.34	314	70	2.0018	1.9162
DNA-Genome-Strongylocentrotus-purpuratus-GCF_000002235.4-2015-03-10.one_line	659082267	500	3	OST-DNA-bsc	21.33	261	73	2.4082	1.8366
DNA-Genome-Strongylocentrotus-purpuratus-GCF_000002235.4-2015-03-10.one_line	659082267	750	3	OST-DNA-bsc	21.32	246	72	2.5551	1.8612
DNA-Genome-Strongylocentrotus-purpuratus-GCF_000002235.4-2015-03-10.one_line	659082267	1000	3	OST-DNA-bsc	21.33	261	74	2.4082	1.8118
DNA-Genome-Strongylocentrotus-purpuratus-GCF_000002235.4-2015-03-10.one_line	659082267	2500	3	OST-DNA-bsc	21.33	236	64	2.6633	2.0948
DNA-Genome-Strongylocentrotus-purpuratus-GCF_000002235.4-2015-03-10.one_line	659082267	5000	3	OST-DNA-bsc	21.32	233	67	2.6976	2.0001
DNA-Genome-Strongylocentrotus-purpuratus-GCF_000002235.4-2015-03-10.one_line	659082267	10000	3	OST-DNA-bsc	21.31	218	65	2.8833	2.0607
DNA-Genome-Strongylocentrotus-purpuratus-GCF_000002235.4-2015-03-10.one_line	659082267	25	4	OST-DNA-bsc	22.35	1191	156	0.5277	0.9005
DNA-Genome-Strongylocentrotus-purpuratus-GCF_000002235.4-2015-03-10.one_line	659082267	50	4	OST-DNA-bsc	21.74	719	105	0.8742	1.3014
DNA-Genome-Strongylocentrotus-purpuratus-GCF_000002235.4-2015-03-10.one_line	659082267	100	4	OST-DNA-bsc	21.47	471	82	1.3345	1.6457
DNA-Genome-Strongylocentrotus-purpuratus-GCF_000002235.4-2015-03-10.one_line	659082267	125	4	OST-DNA-bsc	21.43	424	78	1.4824	1.7269
DNA-Genome-Strongylocentrotus-purpuratus-GCF_000002235.4-2015-03-10.one_line	659082267	150	4	OST-DNA-bsc	21.4	387	75	1.6242	1.7935
DNA-Genome-Strongylocentrotus-purpuratus-GCF_000002235.4-2015-03-10.one_line	659082267	250	4	OST-DNA-bsc	21.35	310	68	2.0276	1.9735
DNA-Genome-Strongylocentrotus-purpuratus-GCF_000002235.4-2015-03-10.one_line	659082267	500	4	OST-DNA-bsc	21.35	268	67	2.3453	2.0029
DNA-Genome-Strongylocentrotus-purpuratus-GCF_000002235.4-2015-03-10.one_line	659082267	750	4	OST-DNA-bsc	21.35	253	67	2.4844	2.0029
DNA-Genome-Strongylocentrotus-purpuratus-GCF_000002235.4-2015-03-10.one_line	659082267	1000	4	OST-DNA-bsc	21.35	241	65	2.6081	2.0645
DNA-Genome-Strongylocentrotus-purpuratus-GCF_000002235.4-2015-03-10.one_line	659082267	2500	4	OST-DNA-bsc	21.36	221	63	2.8441	2.1311
DNA-Genome-Strongylocentrotus-purpuratus-GCF_000002235.4-2015-03-10.one_line	659082267	5000	4	OST-DNA-bsc	21.34	212	59	2.9649	2.2734
DNA-Genome-Strongylocentrotus-purpuratus-GCF_000002235.4-2015-03-10.one_line	659082267	10000	4	OST-DNA-bsc	21.31	204	62	3.0811	2.1604
DNA-Genome-Strongylocentrotus-purpuratus-GCF_000002235.4-2015-03-10.one_line	659082267	25	5	OST-DNA-bsc	22.35	1181	156	0.5322	0.9005
DNA-Genome-Strongylocentrotus-purpuratus-GCF_000002235.4-2015-03-10.one_line	659082267	50	5	OST-DNA-bsc	21.74	774	103	0.8121	1.3267
DNA-Genome-Strongylocentrotus-purpuratus-GCF_000002235.4-2015-03-10.one_line	659082267	100	5	OST-DNA-bsc	21.47	496	86	1.2672	1.5692
DNA-Genome-Strongylocentrotus-purpuratus-GCF_000002235.4-2015-03-10.one_line	659082267	125	5	OST-DNA-bsc	21.43	428	79	1.4686	1.705
DNA-Genome-Strongylocentrotus-purpuratus-GCF_000002235.4-2015-03-10.one_line	659082267	150	5	OST-DNA-bsc	21.4	415	76	1.5146	1.7699
DNA-Genome-Strongylocentrotus-purpuratus-GCF_000002235.4-2015-03-10.one_line	659082267	250	5	OST-DNA-bsc	21.35	335	71	1.8763	1.8901
DNA-Genome-Strongylocentrotus-purpuratus-GCF_000002235.4-2015-03-10.one_line	659082267	500	5	OST-DNA-bsc	21.35	268	67	2.3453	2.0029
DNA-Genome-Strongylocentrotus-purpuratus-GCF_000002235.4-2015-03-10.one_line	659082267	750	5	OST-DNA-bsc	21.35	251	68	2.5042	1.9735
DNA-Genome-Strongylocentrotus-purpuratus-GCF_000002235.4-2015-03-10.one_line	659082267	1000	5	OST-DNA-bsc	21.35	244	66	2.576	2.0333
DNA-Genome-Strongylocentrotus-purpuratus-GCF_000002235.4-2015-03-10.one_line	659082267	2500	5	OST-DNA-bsc	21.36	225	65	2.7936	2.0655
DNA-Genome-Strongylocentrotus-purpuratus-GCF_000002235.4-2015-03-10.one_line	659082267	5000	5	OST-DNA-bsc	21.34	219	64	2.8701	2.0958
DNA-Genome-Strongylocentrotus-purpuratus-GCF_000002235.4-2015-03-10.one_line	659082267	10000	5	OST-DNA-bsc	21.31	214	64	2.9371	2.0929
DNA-Genome-Strongylocentrotus-purpuratus-GCF_000002235.4-2015-03-10.one_line	659082267	25	1	OST-DNA-bzip2	24.34	1103	109	0.5699	1.4036
DNA-Genome-Strongylocentrotus-purpuratus-GCF_000002235.4-2015-03-10.one_line	659082267	50	1	OST-DNA-bzip2	23.84	649	69	0.9685	2.1717
DNA-Genome-Strongylocentrotus-purpuratus-GCF_000002235.4-2015-03-10.one_line	659082267	100	1	OST-DNA-bzip2	23.6	427	55	1.472	2.6971
DNA-Genome-Strongylocentrotus-purpuratus-GCF_000002235.4-2015-03-10.one_line	659082267	125	1	OST-DNA-bzip2	23.56	382	48	1.6454	3.0851
DNA-Genome-Strongylocentrotus-purpuratus-GCF_000002235.4-2015-03-10.one_line	659082267	150	1	OST-DNA-bzip2	23.53	335	52	1.8763	2.8442
DNA-Genome-Strongylocentrotus-purpuratus-GCF_000002235.4-2015-03-10.one_line	659082267	250	1	OST-DNA-bzip2	23.48	272	40	2.3108	3.6896
DNA-Genome-Strongylocentrotus-purpuratus-GCF_000002235.4-2015-03-10.one_line	659082267	500	1	OST-DNA-bzip2	23.44	228	35	2.7568	4.2095
DNA-Genome-Strongylocentrotus-purpuratus-GCF_000002235.4-2015-03-10.one_line	659082267	750	1	OST-DNA-bzip2	23.42	223	36	2.8186	4.0891
DNA-Genome-Strongylocentrotus-purpuratus-GCF_000002235.4-2015-03-10.one_line	659082267	1000	1	OST-DNA-bzip2	23.42	193	34	3.2567	4.3296
DNA-Genome-Strongylocentrotus-purpuratus-GCF_000002235.4-2015-03-10.one_line	659082267	2500	1	OST-DNA-bzip2	23.4	176	33	3.5713	4.457
DNA-Genome-Strongylocentrotus-purpuratus-GCF_000002235.4-2015-03-10.one_line	659082267	5000	1	OST-DNA-bzip2	23.4	169	32	3.7192	4.5963
DNA-Genome-Strongylocentrotus-purpuratus-GCF_000002235.4-2015-03-10.one_line	659082267	10000	1	OST-DNA-bzip2	23.4	161	32	3.904	4.5963
DNA-Genome-Strongylocentrotus-purpuratus-GCF_000002235.4-2015-03-10.one_line	659082267	25	2	OST-DNA-bzip2	24.59	1113	127	0.5647	1.217
DNA-Genome-Strongylocentrotus-purpuratus-GCF_000002235.4-2015-03-10.one_line	659082267	50	2	OST-DNA-bzip2	23.9	644	73	0.976	2.0579
DNA-Genome-Strongylocentrotus-purpuratus-GCF_000002235.4-2015-03-10.one_line	659082267	100	2	OST-DNA-bzip2	23.61	422	53	1.4895	2.8
DNA-Genome-Strongylocentrotus-purpuratus-GCF_000002235.4-2015-03-10.one_line	659082267	125	2	OST-DNA-bzip2	23.57	366	47	1.7173	3.1521
DNA-Genome-Strongylocentrotus-purpuratus-GCF_000002235.4-2015-03-10.one_line	659082267	150	2	OST-DNA-bzip2	23.54	341	46	1.8433	3.2165
DNA-Genome-Strongylocentrotus-purpuratus-GCF_000002235.4-2015-03-10.one_line	659082267	250	2	OST-DNA-bzip2	23.48	268	39	2.3453	3.7842
DNA-Genome-Strongylocentrotus-purpuratus-GCF_000002235.4-2015-03-10.one_line	659082267	500	2	OST-DNA-bzip2	23.46	219	37	2.8701	3.9853
DNA-Genome-Strongylocentrotus-purpuratus-GCF_000002235.4-2015-03-10.one_line	659082267	750	2	OST-DNA-bzip2	23.46	201	40	3.1271	3.6864
DNA-Genome-Strongylocentrotus-purpuratus-GCF_000002235.4-2015-03-10.one_line	659082267	1000	2	OST-DNA-bzip2	23.46	186	51	3.3793	2.8913
DNA-Genome-Strongylocentrotus-purpuratus-GCF_000002235.4-2015-03-10.one_line	659082267	2500	2	OST-DNA-bzip2	23.46	185	39	3.3976	3.781
DNA-Genome-Strongylocentrotus-purpuratus-GCF_000002235.4-2015-03-10.one_line	659082267	5000	2	OST-DNA-bzip2	23.46	186	66	3.3793	2.2342
DNA-Genome-Strongylocentrotus-purpuratus-GCF_000002235.4-2015-03-10.one_line	659082267	10000	2	OST-DNA-bzip2	23.45	229	41	2.7448	3.595
DNA-Genome-Strongylocentrotus-purpuratus-GCF_000002235.4-2015-03-10.one_line	659082267	25	3	OST-DNA-bzip2	24.59	1199	132	0.5242	1.1709
DNA-Genome-Strongylocentrotus-purpuratus-GCF_000002235.4-2015-03-10.one_line	659082267	50	3	OST-DNA-bzip2	23.9	675	86	0.9312	1.7468
DNA-Genome-Strongylocentrotus-purpuratus-GCF_000002235.4-2015-03-10.one_line	659082267	100	3	OST-DNA-bzip2	23.61	437	60	1.4383	2.4733
DNA-Genome-Strongylocentrotus-purpuratus-GCF_000002235.4-2015-03-10.one_line	659082267	125	3	OST-DNA-bzip2	23.57	379	47	1.6584	3.1521
DNA-Genome-Strongylocentrotus-purpuratus-GCF_000002235.4-2015-03-10.one_line	659082267	150	3	OST-DNA-bzip2	23.54	343	46	1.8325	3.2165
DNA-Genome-Strongylocentrotus-purpuratus-GCF_000002235.4-2015-03-10.one_line	659082267	250	3	OST-DNA-bzip2	23.49	291	40	2.16	3.6912
DNA-Genome-Strongylocentrotus-purpuratus-GCF_000002235.4-2015-03-10.one_line	659082267	500	3	OST-DNA-bzip2	23.46	232	37	2.7093	3.9853
DNA-Genome-Strongylocentrotus-purpuratus-GCF_000002235.4-2015-03-10.one_line	659082267	750	3	OST-DNA-bzip2	23.46	209	35	3.0074	4.2131
DNA-Genome-Strongylocentrotus-purpuratus-GCF_000002235.4-2015-03-10.one_line	659082267	1000	3	OST-DNA-bzip2	23.46	204	35	3.0811	4.2131
DNA-Genome-Strongylocentrotus-purpuratus-GCF_000002235.4-2015-03-10.one_line	659082267	2500	3	OST-DNA-bzip2	23.47	184	34	3.416	4.3388
DNA-Genome-Strongylocentrotus-purpuratus-GCF_000002235.4-2015-03-10.one_line	659082267	5000	3	OST-DNA-bzip2	23.47	178	35	3.5312	4.2149
DNA-Genome-Strongylocentrotus-purpuratus-GCF_000002235.4-2015-03-10.one_line	659082267	10000	3	OST-DNA-bzip2	23.46	243	39	2.5866	3.781
DNA-Genome-Strongylocentrotus-purpuratus-GCF_000002235.4-2015-03-10.one_line	659082267	25	4	OST-DNA-bzip2	24.59	1391	130	0.4519	1.1889
DNA-Genome-Strongylocentrotus-purpuratus-GCF_000002235.4-2015-03-10.one_line	659082267	50	4	OST-DNA-bzip2	23.9	675	76	0.9312	1.9766
DNA-Genome-Strongylocentrotus-purpuratus-GCF_000002235.4-2015-03-10.one_line	659082267	100	4	OST-DNA-bzip2	23.61	432	53	1.455	2.8
DNA-Genome-Strongylocentrotus-purpuratus-GCF_000002235.4-2015-03-10.one_line	659082267	125	4	OST-DNA-bzip2	23.56	384	49	1.6368	3.0222
DNA-Genome-Strongylocentrotus-purpuratus-GCF_000002235.4-2015-03-10.one_line	659082267	150	4	OST-DNA-bzip2	23.53	353	46	1.7806	3.2152
DNA-Genome-Strongylocentrotus-purpuratus-GCF_000002235.4-2015-03-10.one_line	659082267	250	4	OST-DNA-bzip2	23.49	288	43	2.1825	3.4336
DNA-Genome-Strongylocentrotus-purpuratus-GCF_000002235.4-2015-03-10.one_line	659082267	500	4	OST-DNA-bzip2	23.48	225	37	2.7936	3.9887
DNA-Genome-Strongylocentrotus-purpuratus-GCF_000002235.4-2015-03-10.one_line	659082267	750	4	OST-DNA-bzip2	23.48	214	37	2.9371	3.9887
DNA-Genome-Strongylocentrotus-purpuratus-GCF_000002235.4-2015-03-10.one_line	659082267	1000	4	OST-DNA-bzip2	23.48	208	36	3.0219	4.0995
DNA-Genome-Strongylocentrotus-purpuratus-GCF_000002235.4-2015-03-10.one_line	659082267	2500	4	OST-DNA-bzip2	23.5	200	36	3.1427	4.103
DNA-Genome-Strongylocentrotus-purpuratus-GCF_000002235.4-2015-03-10.one_line	659082267	5000	4	OST-DNA-bzip2	23.49	210	42	2.9931	3.5154
DNA-Genome-Strongylocentrotus-purpuratus-GCF_000002235.4-2015-03-10.one_line	659082267	10000	4	OST-DNA-bzip2	23.47	173	36	3.6332	4.0978
DNA-Genome-Strongylocentrotus-purpuratus-GCF_000002235.4-2015-03-10.one_line	659082267	25	5	OST-DNA-bzip2	24.59	1158	130	0.5428	1.1889
DNA-Genome-Strongylocentrotus-purpuratus-GCF_000002235.4-2015-03-10.one_line	659082267	50	5	OST-DNA-bzip2	23.9	674	77	0.9326	1.951
DNA-Genome-Strongylocentrotus-purpuratus-GCF_000002235.4-2015-03-10.one_line	659082267	100	5	OST-DNA-bzip2	23.61	429	53	1.4652	2.8
DNA-Genome-Strongylocentrotus-purpuratus-GCF_000002235.4-2015-03-10.one_line	659082267	125	5	OST-DNA-bzip2	23.56	391	49	1.6075	3.0222
DNA-Genome-Strongylocentrotus-purpuratus-GCF_000002235.4-2015-03-10.one_line	659082267	150	5	OST-DNA-bzip2	23.53	365	46	1.7221	3.2152
DNA-Genome-Strongylocentrotus-purpuratus-GCF_000002235.4-2015-03-10.one_line	659082267	250	5	OST-DNA-bzip2	23.49	285	42	2.2054	3.5154
DNA-Genome-Strongylocentrotus-purpuratus-GCF_000002235.4-2015-03-10.one_line	659082267	500	5	OST-DNA-bzip2	23.48	228	38	2.7568	3.8838
DNA-Genome-Strongylocentrotus-purpuratus-GCF_000002235.4-2015-03-10.one_line	659082267	750	5	OST-DNA-bzip2	23.48	225	36	2.7936	4.0995
DNA-Genome-Strongylocentrotus-purpuratus-GCF_000002235.4-2015-03-10.one_line	659082267	1000	5	OST-DNA-bzip2	23.48	204	36	3.0811	4.0995
DNA-Genome-Strongylocentrotus-purpuratus-GCF_000002235.4-2015-03-10.one_line	659082267	2500	5	OST-DNA-bzip2	23.5	190	41	3.3082	3.6027
DNA-Genome-Strongylocentrotus-purpuratus-GCF_000002235.4-2015-03-10.one_line	659082267	5000	5	OST-DNA-bzip2	23.49	180	34	3.4919	4.3425
DNA-Genome-Strongylocentrotus-purpuratus-GCF_000002235.4-2015-03-10.one_line	659082267	10000	5	OST-DNA-bzip2	23.47	180	33	3.4919	4.4703
DNA-Genome-Strongylocentrotus-purpuratus-GCF_000002235.4-2015-03-10.one_line	659082267	25	1	OST-DNA-lrzip	22.14	1912	157	0.3287	0.8864
DNA-Genome-Strongylocentrotus-purpuratus-GCF_000002235.4-2015-03-10.one_line	659082267	50	1	OST-DNA-lrzip	21.16	1665	120	0.3775	1.1083
DNA-Genome-Strongylocentrotus-purpuratus-GCF_000002235.4-2015-03-10.one_line	659082267	100	1	OST-DNA-lrzip	20.63	1477	92	0.4256	1.4095
DNA-Genome-Strongylocentrotus-purpuratus-GCF_000002235.4-2015-03-10.one_line	659082267	125	1	OST-DNA-lrzip	20.54	1435	93	0.438	1.3882
DNA-Genome-Strongylocentrotus-purpuratus-GCF_000002235.4-2015-03-10.one_line	659082267	150	1	OST-DNA-lrzip	20.47	1363	55	0.4612	2.3393
DNA-Genome-Strongylocentrotus-purpuratus-GCF_000002235.4-2015-03-10.one_line	659082267	250	1	OST-DNA-lrzip	20.37	1309	50	0.4802	2.5607
DNA-Genome-Strongylocentrotus-purpuratus-GCF_000002235.4-2015-03-10.one_line	659082267	500	1	OST-DNA-lrzip	20.3	1232	43	0.5102	2.9673
DNA-Genome-Strongylocentrotus-purpuratus-GCF_000002235.4-2015-03-10.one_line	659082267	750	1	OST-DNA-lrzip	20.28	1400	41	0.449	3.109
DNA-Genome-Strongylocentrotus-purpuratus-GCF_000002235.4-2015-03-10.one_line	659082267	1000	1	OST-DNA-lrzip	20.27	1245	42	0.5049	3.0335
DNA-Genome-Strongylocentrotus-purpuratus-GCF_000002235.4-2015-03-10.one_line	659082267	2500	1	OST-DNA-lrzip	20.25	1197	43	0.5251	2.96
DNA-Genome-Strongylocentrotus-purpuratus-GCF_000002235.4-2015-03-10.one_line	659082267	5000	1	OST-DNA-lrzip	20.24	1189	56	0.5286	2.2718
DNA-Genome-Strongylocentrotus-purpuratus-GCF_000002235.4-2015-03-10.one_line	659082267	10000	1	OST-DNA-lrzip	20.23	1202	69	0.5229	1.8428
DNA-Genome-Strongylocentrotus-purpuratus-GCF_000002235.4-2015-03-10.one_line	659082267	25	2	OST-DNA-lrzip	22.47	2048	536	0.3069	0.2635
DNA-Genome-Strongylocentrotus-purpuratus-GCF_000002235.4-2015-03-10.one_line	659082267	50	2	OST-DNA-lrzip	21.3	1646	537	0.3819	0.2493
DNA-Genome-Strongylocentrotus-purpuratus-GCF_000002235.4-2015-03-10.one_line	659082267	100	2	OST-DNA-lrzip	20.71	1407	464	0.4467	0.2805
DNA-Genome-Strongylocentrotus-purpuratus-GCF_000002235.4-2015-03-10.one_line	659082267	125	2	OST-DNA-lrzip	20.61	1346	448	0.467	0.2892
DNA-Genome-Strongylocentrotus-purpuratus-GCF_000002235.4-2015-03-10.one_line	659082267	150	2	OST-DNA-lrzip	20.55	1187	440	0.5295	0.2936
DNA-Genome-Strongylocentrotus-purpuratus-GCF_000002235.4-2015-03-10.one_line	659082267	250	2	OST-DNA-lrzip	20.49	1032	414	0.6091	0.3111
DNA-Genome-Strongylocentrotus-purpuratus-GCF_000002235.4-2015-03-10.one_line	659082267	500	2	OST-DNA-lrzip	20.48	1035	400	0.6073	0.3218
DNA-Genome-Strongylocentrotus-purpuratus-GCF_000002235.4-2015-03-10.one_line	659082267	750	2	OST-DNA-lrzip	20.51	959	365	0.6554	0.3532
DNA-Genome-Strongylocentrotus-purpuratus-GCF_000002235.4-2015-03-10.one_line	659082267	1000	2	OST-DNA-lrzip	20.53	980	348	0.6414	0.3708
DNA-Genome-Strongylocentrotus-purpuratus-GCF_000002235.4-2015-03-10.one_line	659082267	2500	2	OST-DNA-lrzip	20.55	986	255	0.6375	0.5065
DNA-Genome-Strongylocentrotus-purpuratus-GCF_000002235.4-2015-03-10.one_line	659082267	5000	2	OST-DNA-lrzip	20.53	991	197	0.6343	0.655
DNA-Genome-Strongylocentrotus-purpuratus-GCF_000002235.4-2015-03-10.one_line	659082267	10000	2	OST-DNA-lrzip	20.44	1084	147	0.5798	0.874
DNA-Genome-Strongylocentrotus-purpuratus-GCF_000002235.4-2015-03-10.one_line	659082267	25	3	OST-DNA-lrzip	22.49	1987	550	0.3163	0.257
DNA-Genome-Strongylocentrotus-purpuratus-GCF_000002235.4-2015-03-10.one_line	659082267	50	3	OST-DNA-lrzip	21.31	1579	488	0.3981	0.2745
DNA-Genome-Strongylocentrotus-purpuratus-GCF_000002235.4-2015-03-10.one_line	659082267	100	3	OST-DNA-lrzip	20.73	1383	454	0.4545	0.287
DNA-Genome-Strongylocentrotus-purpuratus-GCF_000002235.4-2015-03-10.one_line	659082267	125	3	OST-DNA-lrzip	20.63	1351	453	0.4652	0.2862
DNA-Genome-Strongylocentrotus-purpuratus-GCF_000002235.4-2015-03-10.one_line	659082267	150	3	OST-DNA-lrzip	20.58	1465	450	0.429	0.2875
DNA-Genome-Strongylocentrotus-purpuratus-GCF_000002235.4-2015-03-10.one_line	659082267	250	3	OST-DNA-lrzip	20.51	1317	438	0.4773	0.2943
DNA-Genome-Strongylocentrotus-purpuratus-GCF_000002235.4-2015-03-10.one_line	659082267	500	3	OST-DNA-lrzip	20.51	1271	417	0.4945	0.3092
DNA-Genome-Strongylocentrotus-purpuratus-GCF_000002235.4-2015-03-10.one_line	659082267	750	3	OST-DNA-lrzip	20.55	1303	391	0.4824	0.3304
DNA-Genome-Strongylocentrotus-purpuratus-GCF_000002235.4-2015-03-10.one_line	659082267	1000	3	OST-DNA-lrzip	20.57	1323	354	0.4751	0.3652
DNA-Genome-Strongylocentrotus-purpuratus-GCF_000002235.4-2015-03-10.one_line	659082267	2500	3	OST-DNA-lrzip	20.63	1275	260	0.493	0.4987
DNA-Genome-Strongylocentrotus-purpuratus-GCF_000002235.4-2015-03-10.one_line	659082267	5000	3	OST-DNA-lrzip	20.63	1263	191	0.4977	0.6789
DNA-Genome-Strongylocentrotus-purpuratus-GCF_000002235.4-2015-03-10.one_line	659082267	10000	3	OST-DNA-lrzip	20.56	1236	145	0.5085	0.8912
DNA-Genome-Strongylocentrotus-purpuratus-GCF_000002235.4-2015-03-10.one_line	659082267	25	4	OST-DNA-lrzip	22.5	2054	544	0.306	0.26
DNA-Genome-Strongylocentrotus-purpuratus-GCF_000002235.4-2015-03-10.one_line	659082267	50	4	OST-DNA-lrzip	21.32	1516	486	0.4146	0.2757
DNA-Genome-Strongylocentrotus-purpuratus-GCF_000002235.4-2015-03-10.one_line	659082267	100	4	OST-DNA-lrzip	20.74	1344	485	0.4677	0.2688
DNA-Genome-Strongylocentrotus-purpuratus-GCF_000002235.4-2015-03-10.one_line	659082267	125	4	OST-DNA-lrzip	20.65	1236	455	0.5085	0.2853
DNA-Genome-Strongylocentrotus-purpuratus-GCF_000002235.4-2015-03-10.one_line	659082267	150	4	OST-DNA-lrzip	20.61	1239	432	0.5073	0.2999
DNA-Genome-Strongylocentrotus-purpuratus-GCF_000002235.4-2015-03-10.one_line	659082267	250	4	OST-DNA-lrzip	20.57	1151	445	0.5461	0.2905
DNA-Genome-Strongylocentrotus-purpuratus-GCF_000002235.4-2015-03-10.one_line	659082267	500	4	OST-DNA-lrzip	20.65	1224	395	0.5135	0.3286
DNA-Genome-Strongylocentrotus-purpuratus-GCF_000002235.4-2015-03-10.one_line	659082267	750	4	OST-DNA-lrzip	20.71	1257	389	0.5	0.3346
DNA-Genome-Strongylocentrotus-purpuratus-GCF_000002235.4-2015-03-10.one_line	659082267	1000	4	OST-DNA-lrzip	20.76	1260	361	0.4988	0.3615
DNA-Genome-Strongylocentrotus-purpuratus-GCF_000002235.4-2015-03-10.one_line	659082267	2500	4	OST-DNA-lrzip	20.84	1255	270	0.5008	0.4851
DNA-Genome-Strongylocentrotus-purpuratus-GCF_000002235.4-2015-03-10.one_line	659082267	5000	4	OST-DNA-lrzip	20.77	1252	202	0.502	0.6463
DNA-Genome-Strongylocentrotus-purpuratus-GCF_000002235.4-2015-03-10.one_line	659082267	10000	4	OST-DNA-lrzip	20.63	1197	144	0.5251	0.9005
DNA-Genome-Strongylocentrotus-purpuratus-GCF_000002235.4-2015-03-10.one_line	659082267	25	5	OST-DNA-lrzip	22.5	2038	559	0.3084	0.253
DNA-Genome-Strongylocentrotus-purpuratus-GCF_000002235.4-2015-03-10.one_line	659082267	50	5	OST-DNA-lrzip	21.32	1693	503	0.3713	0.2664
DNA-Genome-Strongylocentrotus-purpuratus-GCF_000002235.4-2015-03-10.one_line	659082267	100	5	OST-DNA-lrzip	20.74	1505	496	0.4176	0.2628
DNA-Genome-Strongylocentrotus-purpuratus-GCF_000002235.4-2015-03-10.one_line	659082267	125	5	OST-DNA-lrzip	20.65	1489	461	0.4221	0.2816
DNA-Genome-Strongylocentrotus-purpuratus-GCF_000002235.4-2015-03-10.one_line	659082267	150	5	OST-DNA-lrzip	20.61	1315	449	0.478	0.2885
DNA-Genome-Strongylocentrotus-purpuratus-GCF_000002235.4-2015-03-10.one_line	659082267	250	5	OST-DNA-lrzip	20.57	1221	423	0.5148	0.3057
DNA-Genome-Strongylocentrotus-purpuratus-GCF_000002235.4-2015-03-10.one_line	659082267	500	5	OST-DNA-lrzip	20.65	1257	404	0.5	0.3213
DNA-Genome-Strongylocentrotus-purpuratus-GCF_000002235.4-2015-03-10.one_line	659082267	750	5	OST-DNA-lrzip	20.71	1146	375	0.5485	0.3471
DNA-Genome-Strongylocentrotus-purpuratus-GCF_000002235.4-2015-03-10.one_line	659082267	1000	5	OST-DNA-lrzip	20.76	1014	336	0.6199	0.3884
DNA-Genome-Strongylocentrotus-purpuratus-GCF_000002235.4-2015-03-10.one_line	659082267	2500	5	OST-DNA-lrzip	20.84	940	233	0.6687	0.5622
DNA-Genome-Strongylocentrotus-purpuratus-GCF_000002235.4-2015-03-10.one_line	659082267	5000	5	OST-DNA-lrzip	20.77	898	176	0.6999	0.7418
DNA-Genome-Strongylocentrotus-purpuratus-GCF_000002235.4-2015-03-10.one_line	659082267	10000	5	OST-DNA-lrzip	20.63	906	128	0.6938	1.013
DNA-Genome-Strongylocentrotus-purpuratus-GCF_000002235.4-2015-03-10.one_line	659082267	25	1	OST-DNA-lzip	22.67	1907	95	0.3296	1.4999
DNA-Genome-Strongylocentrotus-purpuratus-GCF_000002235.4-2015-03-10.one_line	659082267	50	1	OST-DNA-lzip	21.9	1523	46	0.4127	2.9924
DNA-Genome-Strongylocentrotus-purpuratus-GCF_000002235.4-2015-03-10.one_line	659082267	100	1	OST-DNA-lzip	21.51	1237	28	0.5081	4.8286
DNA-Genome-Strongylocentrotus-purpuratus-GCF_000002235.4-2015-03-10.one_line	659082267	125	1	OST-DNA-lzip	21.43	1113	24	0.5647	5.6124
DNA-Genome-Strongylocentrotus-purpuratus-GCF_000002235.4-2015-03-10.one_line	659082267	150	1	OST-DNA-lzip	21.37	1130	22	0.5562	6.1055
DNA-Genome-Strongylocentrotus-purpuratus-GCF_000002235.4-2015-03-10.one_line	659082267	250	1	OST-DNA-lzip	21.25	1060	19	0.593	7.0298
DNA-Genome-Strongylocentrotus-purpuratus-GCF_000002235.4-2015-03-10.one_line	659082267	500	1	OST-DNA-lzip	21.17	974	22	0.6453	6.0484
DNA-Genome-Strongylocentrotus-purpuratus-GCF_000002235.4-2015-03-10.one_line	659082267	750	1	OST-DNA-lzip	21.15	1109	15	0.5668	8.8626
DNA-Genome-Strongylocentrotus-purpuratus-GCF_000002235.4-2015-03-10.one_line	659082267	1000	1	OST-DNA-lzip	21.14	991	17	0.6343	7.8162
DNA-Genome-Strongylocentrotus-purpuratus-GCF_000002235.4-2015-03-10.one_line	659082267	2500	1	OST-DNA-lzip	21.16	1017	14	0.618	9.5001
DNA-Genome-Strongylocentrotus-purpuratus-GCF_000002235.4-2015-03-10.one_line	659082267	5000	1	OST-DNA-lzip	21.18	964	15	0.652	8.8751
DNA-Genome-Strongylocentrotus-purpuratus-GCF_000002235.4-2015-03-10.one_line	659082267	10000	1	OST-DNA-lzip	21.23	940	13	0.6687	10.2647
DNA-Genome-Strongylocentrotus-purpuratus-GCF_000002235.4-2015-03-10.one_line	659082267	25	2	OST-DNA-lzip	22.87	2233	102	0.2815	1.4093
DNA-Genome-Strongylocentrotus-purpuratus-GCF_000002235.4-2015-03-10.one_line	659082267	50	2	OST-DNA-lzip	21.95	1446	51	0.4347	2.7052
DNA-Genome-Strongylocentrotus-purpuratus-GCF_000002235.4-2015-03-10.one_line	659082267	100	2	OST-DNA-lzip	21.52	1205	30	0.5216	4.5088
DNA-Genome-Strongylocentrotus-purpuratus-GCF_000002235.4-2015-03-10.one_line	659082267	125	2	OST-DNA-lzip	21.46	1166	27	0.5391	4.9958
DNA-Genome-Strongylocentrotus-purpuratus-GCF_000002235.4-2015-03-10.one_line	659082267	150	2	OST-DNA-lzip	21.41	1140	25	0.5514	5.3829
DNA-Genome-Strongylocentrotus-purpuratus-GCF_000002235.4-2015-03-10.one_line	659082267	250	2	OST-DNA-lzip	21.35	1059	20	0.5935	6.7098
DNA-Genome-Strongylocentrotus-purpuratus-GCF_000002235.4-2015-03-10.one_line	659082267	500	2	OST-DNA-lzip	21.31	1041	18	0.6038	7.4413
DNA-Genome-Strongylocentrotus-purpuratus-GCF_000002235.4-2015-03-10.one_line	659082267	750	2	OST-DNA-lzip	21.34	993	16	0.633	8.3833
DNA-Genome-Strongylocentrotus-purpuratus-GCF_000002235.4-2015-03-10.one_line	659082267	1000	2	OST-DNA-lzip	21.36	1020	16	0.6162	8.3911
DNA-Genome-Strongylocentrotus-purpuratus-GCF_000002235.4-2015-03-10.one_line	659082267	2500	2	OST-DNA-lzip	21.45	963	15	0.6527	8.9883
DNA-Genome-Strongylocentrotus-purpuratus-GCF_000002235.4-2015-03-10.one_line	659082267	5000	2	OST-DNA-lzip	21.47	959	14	0.6554	9.6393
DNA-Genome-Strongylocentrotus-purpuratus-GCF_000002235.4-2015-03-10.one_line	659082267	10000	2	OST-DNA-lzip	21.42	924	14	0.6802	9.6168
DNA-Genome-Strongylocentrotus-purpuratus-GCF_000002235.4-2015-03-10.one_line	659082267	25	3	OST-DNA-lzip	22.88	1861	105	0.3377	1.3696
DNA-Genome-Strongylocentrotus-purpuratus-GCF_000002235.4-2015-03-10.one_line	659082267	50	3	OST-DNA-lzip	21.96	1440	52	0.4365	2.6544
DNA-Genome-Strongylocentrotus-purpuratus-GCF_000002235.4-2015-03-10.one_line	659082267	100	3	OST-DNA-lzip	21.54	1193	32	0.5269	4.2309
DNA-Genome-Strongylocentrotus-purpuratus-GCF_000002235.4-2015-03-10.one_line	659082267	125	3	OST-DNA-lzip	21.47	1081	26	0.5815	5.1904
DNA-Genome-Strongylocentrotus-purpuratus-GCF_000002235.4-2015-03-10.one_line	659082267	150	3	OST-DNA-lzip	21.43	997	24	0.6304	5.6124
DNA-Genome-Strongylocentrotus-purpuratus-GCF_000002235.4-2015-03-10.one_line	659082267	250	3	OST-DNA-lzip	21.36	923	20	0.681	6.7129
DNA-Genome-Strongylocentrotus-purpuratus-GCF_000002235.4-2015-03-10.one_line	659082267	500	3	OST-DNA-lzip	21.33	879	17	0.7151	7.8865
DNA-Genome-Strongylocentrotus-purpuratus-GCF_000002235.4-2015-03-10.one_line	659082267	750	3	OST-DNA-lzip	21.36	906	15	0.6938	8.9505
DNA-Genome-Strongylocentrotus-purpuratus-GCF_000002235.4-2015-03-10.one_line	659082267	1000	3	OST-DNA-lzip	21.37	911	15	0.69	8.9547
DNA-Genome-Strongylocentrotus-purpuratus-GCF_000002235.4-2015-03-10.one_line	659082267	2500	3	OST-DNA-lzip	21.47	909	14	0.6915	9.6393
DNA-Genome-Strongylocentrotus-purpuratus-GCF_000002235.4-2015-03-10.one_line	659082267	5000	3	OST-DNA-lzip	21.5	871	14	0.7216	9.6527
DNA-Genome-Strongylocentrotus-purpuratus-GCF_000002235.4-2015-03-10.one_line	659082267	10000	3	OST-DNA-lzip	21.45	878	13	0.7159	10.3711
DNA-Genome-Strongylocentrotus-purpuratus-GCF_000002235.4-2015-03-10.one_line	659082267	25	4	OST-DNA-lzip	22.89	1873	108	0.3356	1.3322
DNA-Genome-Strongylocentrotus-purpuratus-GCF_000002235.4-2015-03-10.one_line	659082267	50	4	OST-DNA-lzip	21.96	1402	53	0.4483	2.6043
DNA-Genome-Strongylocentrotus-purpuratus-GCF_000002235.4-2015-03-10.one_line	659082267	100	4	OST-DNA-lzip	21.55	1173	31	0.5358	4.3694
DNA-Genome-Strongylocentrotus-purpuratus-GCF_000002235.4-2015-03-10.one_line	659082267	125	4	OST-DNA-lzip	21.49	1133	28	0.5548	4.8241
DNA-Genome-Strongylocentrotus-purpuratus-GCF_000002235.4-2015-03-10.one_line	659082267	150	4	OST-DNA-lzip	21.45	1099	26	0.5719	5.1855
DNA-Genome-Strongylocentrotus-purpuratus-GCF_000002235.4-2015-03-10.one_line	659082267	250	4	OST-DNA-lzip	21.41	1020	22	0.6162	6.1169
DNA-Genome-Strongylocentrotus-purpuratus-GCF_000002235.4-2015-03-10.one_line	659082267	500	4	OST-DNA-lzip	21.44	982	18	0.6401	7.4867
DNA-Genome-Strongylocentrotus-purpuratus-GCF_000002235.4-2015-03-10.one_line	659082267	750	4	OST-DNA-lzip	21.48	968	16	0.6493	8.4383
DNA-Genome-Strongylocentrotus-purpuratus-GCF_000002235.4-2015-03-10.one_line	659082267	1000	4	OST-DNA-lzip	21.52	998	17	0.6298	7.9567
DNA-Genome-Strongylocentrotus-purpuratus-GCF_000002235.4-2015-03-10.one_line	659082267	2500	4	OST-DNA-lzip	21.64	981	15	0.6407	9.0679
DNA-Genome-Strongylocentrotus-purpuratus-GCF_000002235.4-2015-03-10.one_line	659082267	5000	4	OST-DNA-lzip	21.63	944	15	0.6658	9.0637
DNA-Genome-Strongylocentrotus-purpuratus-GCF_000002235.4-2015-03-10.one_line	659082267	10000	4	OST-DNA-lzip	21.51	911	14	0.69	9.6572
DNA-Genome-Strongylocentrotus-purpuratus-GCF_000002235.4-2015-03-10.one_line	659082267	25	5	OST-DNA-lzip	22.89	1883	104	0.3338	1.3834
DNA-Genome-Strongylocentrotus-purpuratus-GCF_000002235.4-2015-03-10.one_line	659082267	50	5	OST-DNA-lzip	21.96	1422	53	0.442	2.6043
DNA-Genome-Strongylocentrotus-purpuratus-GCF_000002235.4-2015-03-10.one_line	659082267	100	5	OST-DNA-lzip	21.55	1169	32	0.5377	4.2329
DNA-Genome-Strongylocentrotus-purpuratus-GCF_000002235.4-2015-03-10.one_line	659082267	125	5	OST-DNA-lzip	21.49	1139	28	0.5518	4.8241
DNA-Genome-Strongylocentrotus-purpuratus-GCF_000002235.4-2015-03-10.one_line	659082267	150	5	OST-DNA-lzip	21.45	1093	25	0.5751	5.393
DNA-Genome-Strongylocentrotus-purpuratus-GCF_000002235.4-2015-03-10.one_line	659082267	250	5	OST-DNA-lzip	21.41	1081	21	0.5815	6.4082
DNA-Genome-Strongylocentrotus-purpuratus-GCF_000002235.4-2015-03-10.one_line	659082267	500	5	OST-DNA-lzip	21.44	964	18	0.652	7.4867
DNA-Genome-Strongylocentrotus-purpuratus-GCF_000002235.4-2015-03-10.one_line	659082267	750	5	OST-DNA-lzip	21.48	936	16	0.6715	8.4383
DNA-Genome-Strongylocentrotus-purpuratus-GCF_000002235.4-2015-03-10.one_line	659082267	1000	5	OST-DNA-lzip	21.52	923	15	0.681	9.0176
DNA-Genome-Strongylocentrotus-purpuratus-GCF_000002235.4-2015-03-10.one_line	659082267	2500	5	OST-DNA-lzip	21.64	916	14	0.6862	9.7156
DNA-Genome-Strongylocentrotus-purpuratus-GCF_000002235.4-2015-03-10.one_line	659082267	5000	5	OST-DNA-lzip	21.63	878	13	0.7159	10.4581
DNA-Genome-Strongylocentrotus-purpuratus-GCF_000002235.4-2015-03-10.one_line	659082267	10000	5	OST-DNA-lzip	21.51	846	13	0.743	10.4001
DNA-Genome-Strongylocentrotus-purpuratus-GCF_000002235.4-2015-03-10.one_line	659082267	25	1	OST-DNA-xz	22.65	1892	88	0.3322	1.6178
DNA-Genome-Strongylocentrotus-purpuratus-GCF_000002235.4-2015-03-10.one_line	659082267	50	1	OST-DNA-xz	21.89	1455	55	0.432	2.5016
DNA-Genome-Strongylocentrotus-purpuratus-GCF_000002235.4-2015-03-10.one_line	659082267	100	1	OST-DNA-xz	21.48	1172	27	0.5363	5.0005
DNA-Genome-Strongylocentrotus-purpuratus-GCF_000002235.4-2015-03-10.one_line	659082267	125	1	OST-DNA-xz	21.41	1074	23	0.5852	5.851
DNA-Genome-Strongylocentrotus-purpuratus-GCF_000002235.4-2015-03-10.one_line	659082267	150	1	OST-DNA-xz	21.35	1066	21	0.5896	6.3903
DNA-Genome-Strongylocentrotus-purpuratus-GCF_000002235.4-2015-03-10.one_line	659082267	250	1	OST-DNA-xz	21.24	973	18	0.646	7.4169
DNA-Genome-Strongylocentrotus-purpuratus-GCF_000002235.4-2015-03-10.one_line	659082267	500	1	OST-DNA-xz	21.16	943	14	0.6665	9.5001
DNA-Genome-Strongylocentrotus-purpuratus-GCF_000002235.4-2015-03-10.one_line	659082267	750	1	OST-DNA-xz	21.16	1014	16	0.6199	8.3126
DNA-Genome-Strongylocentrotus-purpuratus-GCF_000002235.4-2015-03-10.one_line	659082267	1000	1	OST-DNA-xz	21.17	951	14	0.6609	9.5046
DNA-Genome-Strongylocentrotus-purpuratus-GCF_000002235.4-2015-03-10.one_line	659082267	2500	1	OST-DNA-xz	21.19	883	12	0.7118	11.0991
DNA-Genome-Strongylocentrotus-purpuratus-GCF_000002235.4-2015-03-10.one_line	659082267	5000	1	OST-DNA-xz	21.2	937	12	0.6708	11.1044
DNA-Genome-Strongylocentrotus-purpuratus-GCF_000002235.4-2015-03-10.one_line	659082267	10000	1	OST-DNA-xz	21.21	889	11	0.707	12.1196
DNA-Genome-Strongylocentrotus-purpuratus-GCF_000002235.4-2015-03-10.one_line	659082267	25	2	OST-DNA-xz	22.87	2032	126	0.3093	1.1409
DNA-Genome-Strongylocentrotus-purpuratus-GCF_000002235.4-2015-03-10.one_line	659082267	50	2	OST-DNA-xz	21.95	1461	48	0.4302	2.8743
DNA-Genome-Strongylocentrotus-purpuratus-GCF_000002235.4-2015-03-10.one_line	659082267	100	2	OST-DNA-xz	21.51	1139	30	0.5518	4.5067
DNA-Genome-Strongylocentrotus-purpuratus-GCF_000002235.4-2015-03-10.one_line	659082267	125	2	OST-DNA-xz	21.44	1093	26	0.5751	5.1831
DNA-Genome-Strongylocentrotus-purpuratus-GCF_000002235.4-2015-03-10.one_line	659082267	150	2	OST-DNA-xz	21.4	1139	24	0.5518	5.6046
DNA-Genome-Strongylocentrotus-purpuratus-GCF_000002235.4-2015-03-10.one_line	659082267	250	2	OST-DNA-xz	21.33	1044	19	0.6021	7.0563
DNA-Genome-Strongylocentrotus-purpuratus-GCF_000002235.4-2015-03-10.one_line	659082267	500	2	OST-DNA-xz	21.31	918	16	0.6847	8.3715
DNA-Genome-Strongylocentrotus-purpuratus-GCF_000002235.4-2015-03-10.one_line	659082267	750	2	OST-DNA-xz	21.32	944	14	0.6658	9.5719
DNA-Genome-Strongylocentrotus-purpuratus-GCF_000002235.4-2015-03-10.one_line	659082267	1000	2	OST-DNA-xz	21.34	942	15	0.6673	8.9422
DNA-Genome-Strongylocentrotus-purpuratus-GCF_000002235.4-2015-03-10.one_line	659082267	2500	2	OST-DNA-xz	21.44	942	12	0.6673	11.2301
DNA-Genome-Strongylocentrotus-purpuratus-GCF_000002235.4-2015-03-10.one_line	659082267	5000	2	OST-DNA-xz	21.45	921	12	0.6825	11.2353
DNA-Genome-Strongylocentrotus-purpuratus-GCF_000002235.4-2015-03-10.one_line	659082267	10000	2	OST-DNA-xz	21.4	877	12	0.7167	11.2091
DNA-Genome-Strongylocentrotus-purpuratus-GCF_000002235.4-2015-03-10.one_line	659082267	25	3	OST-DNA-xz	22.88	1826	103	0.3442	1.3962
DNA-Genome-Strongylocentrotus-purpuratus-GCF_000002235.4-2015-03-10.one_line	659082267	50	3	OST-DNA-xz	21.96	1320	53	0.4762	2.6043
DNA-Genome-Strongylocentrotus-purpuratus-GCF_000002235.4-2015-03-10.one_line	659082267	100	3	OST-DNA-xz	21.52	1103	30	0.5699	4.5088
DNA-Genome-Strongylocentrotus-purpuratus-GCF_000002235.4-2015-03-10.one_line	659082267	125	3	OST-DNA-xz	21.45	1048	26	0.5998	5.1855
DNA-Genome-Strongylocentrotus-purpuratus-GCF_000002235.4-2015-03-10.one_line	659082267	150	3	OST-DNA-xz	21.41	1042	23	0.6032	5.851
DNA-Genome-Strongylocentrotus-purpuratus-GCF_000002235.4-2015-03-10.one_line	659082267	250	3	OST-DNA-xz	21.35	916	18	0.6862	7.4553
DNA-Genome-Strongylocentrotus-purpuratus-GCF_000002235.4-2015-03-10.one_line	659082267	500	3	OST-DNA-xz	21.32	871	14	0.7216	9.5719
DNA-Genome-Strongylocentrotus-purpuratus-GCF_000002235.4-2015-03-10.one_line	659082267	750	3	OST-DNA-xz	21.34	847	14	0.7421	9.5809
DNA-Genome-Strongylocentrotus-purpuratus-GCF_000002235.4-2015-03-10.one_line	659082267	1000	3	OST-DNA-xz	21.36	867	13	0.725	10.3276
DNA-Genome-Strongylocentrotus-purpuratus-GCF_000002235.4-2015-03-10.one_line	659082267	2500	3	OST-DNA-xz	21.46	755	12	0.8325	11.2406
DNA-Genome-Strongylocentrotus-purpuratus-GCF_000002235.4-2015-03-10.one_line	659082267	5000	3	OST-DNA-xz	21.48	814	12	0.7722	11.251
DNA-Genome-Strongylocentrotus-purpuratus-GCF_000002235.4-2015-03-10.one_line	659082267	10000	3	OST-DNA-xz	21.44	833	12	0.7546	11.2301
DNA-Genome-Strongylocentrotus-purpuratus-GCF_000002235.4-2015-03-10.one_line	659082267	25	4	OST-DNA-xz	22.89	1794	105	0.3504	1.3702
DNA-Genome-Strongylocentrotus-purpuratus-GCF_000002235.4-2015-03-10.one_line	659082267	50	4	OST-DNA-xz	21.97	1298	52	0.4842	2.6556
DNA-Genome-Strongylocentrotus-purpuratus-GCF_000002235.4-2015-03-10.one_line	659082267	100	4	OST-DNA-xz	21.53	1096	32	0.5735	4.229
DNA-Genome-Strongylocentrotus-purpuratus-GCF_000002235.4-2015-03-10.one_line	659082267	125	4	OST-DNA-xz	21.48	1063	28	0.5913	4.8219
DNA-Genome-Strongylocentrotus-purpuratus-GCF_000002235.4-2015-03-10.one_line	659082267	150	4	OST-DNA-xz	21.43	1032	24	0.6091	5.6124
DNA-Genome-Strongylocentrotus-purpuratus-GCF_000002235.4-2015-03-10.one_line	659082267	250	4	OST-DNA-xz	21.39	967	19	0.65	7.0761
DNA-Genome-Strongylocentrotus-purpuratus-GCF_000002235.4-2015-03-10.one_line	659082267	500	4	OST-DNA-xz	21.42	928	16	0.6773	8.4147
DNA-Genome-Strongylocentrotus-purpuratus-GCF_000002235.4-2015-03-10.one_line	659082267	750	4	OST-DNA-xz	21.47	929	16	0.6766	8.4344
DNA-Genome-Strongylocentrotus-purpuratus-GCF_000002235.4-2015-03-10.one_line	659082267	1000	4	OST-DNA-xz	21.51	906	14	0.6938	9.6572
DNA-Genome-Strongylocentrotus-purpuratus-GCF_000002235.4-2015-03-10.one_line	659082267	2500	4	OST-DNA-xz	21.63	915	13	0.6869	10.4581
DNA-Genome-Strongylocentrotus-purpuratus-GCF_000002235.4-2015-03-10.one_line	659082267	5000	4	OST-DNA-xz	21.61	890	12	0.7062	11.3191
DNA-Genome-Strongylocentrotus-purpuratus-GCF_000002235.4-2015-03-10.one_line	659082267	10000	4	OST-DNA-xz	21.49	873	12	0.72	11.2563
DNA-Genome-Strongylocentrotus-purpuratus-GCF_000002235.4-2015-03-10.one_line	659082267	25	5	OST-DNA-xz	22.89	1859	102	0.3381	1.4105
DNA-Genome-Strongylocentrotus-purpuratus-GCF_000002235.4-2015-03-10.one_line	659082267	50	5	OST-DNA-xz	21.97	1365	52	0.4605	2.6556
DNA-Genome-Strongylocentrotus-purpuratus-GCF_000002235.4-2015-03-10.one_line	659082267	100	5	OST-DNA-xz	21.53	1107	30	0.5678	4.5109
DNA-Genome-Strongylocentrotus-purpuratus-GCF_000002235.4-2015-03-10.one_line	659082267	125	5	OST-DNA-xz	21.48	1049	26	0.5992	5.1928
DNA-Genome-Strongylocentrotus-purpuratus-GCF_000002235.4-2015-03-10.one_line	659082267	150	5	OST-DNA-xz	21.43	1034	23	0.6079	5.8564
DNA-Genome-Strongylocentrotus-purpuratus-GCF_000002235.4-2015-03-10.one_line	659082267	250	5	OST-DNA-xz	21.39	967	19	0.65	7.0761
DNA-Genome-Strongylocentrotus-purpuratus-GCF_000002235.4-2015-03-10.one_line	659082267	500	5	OST-DNA-xz	21.42	938	16	0.6701	8.4147
DNA-Genome-Strongylocentrotus-purpuratus-GCF_000002235.4-2015-03-10.one_line	659082267	750	5	OST-DNA-xz	21.47	882	15	0.7126	8.9966
DNA-Genome-Strongylocentrotus-purpuratus-GCF_000002235.4-2015-03-10.one_line	659082267	1000	5	OST-DNA-xz	21.51	928	15	0.6773	9.0134
DNA-Genome-Strongylocentrotus-purpuratus-GCF_000002235.4-2015-03-10.one_line	659082267	2500	5	OST-DNA-xz	21.63	872	13	0.7208	10.4581
DNA-Genome-Strongylocentrotus-purpuratus-GCF_000002235.4-2015-03-10.one_line	659082267	5000	5	OST-DNA-xz	21.61	864	12	0.7275	11.3191
DNA-Genome-Strongylocentrotus-purpuratus-GCF_000002235.4-2015-03-10.one_line	659082267	10000	5	OST-DNA-xz	21.49	823	11	0.7637	12.2796
DNA-NCBI-Virus-Complete-Nucleotide-Human-2020-05-11.one_line	470877038	25	1	OST-DNA-bcm	10.79	909	168	0.494	0.2884
DNA-NCBI-Virus-Complete-Nucleotide-Human-2020-05-11.one_line	470877038	50	1	OST-DNA-bcm	8.52	612	123	0.7338	0.3111
DNA-NCBI-Virus-Complete-Nucleotide-Human-2020-05-11.one_line	470877038	100	1	OST-DNA-bcm	7.23	336	102	1.3365	0.3183
DNA-NCBI-Virus-Complete-Nucleotide-Human-2020-05-11.one_line	470877038	125	1	OST-DNA-bcm	6.94	308	107	1.458	0.2913
DNA-NCBI-Virus-Complete-Nucleotide-Human-2020-05-11.one_line	470877038	150	1	OST-DNA-bcm	6.73	285	98	1.5757	0.3084
DNA-NCBI-Virus-Complete-Nucleotide-Human-2020-05-11.one_line	470877038	250	1	OST-DNA-bcm	6.48	228	98	1.9696	0.2969
DNA-NCBI-Virus-Complete-Nucleotide-Human-2020-05-11.one_line	470877038	500	1	OST-DNA-bcm	6.25	202	96	2.2231	0.2924
DNA-NCBI-Virus-Complete-Nucleotide-Human-2020-05-11.one_line	470877038	750	1	OST-DNA-bcm	6.12	189	94	2.376	0.2924
DNA-NCBI-Virus-Complete-Nucleotide-Human-2020-05-11.one_line	470877038	1000	1	OST-DNA-bcm	6.03	177	96	2.5371	0.2821
DNA-NCBI-Virus-Complete-Nucleotide-Human-2020-05-11.one_line	470877038	2500	1	OST-DNA-bcm	6.14	164	90	2.7382	0.3064
DNA-NCBI-Virus-Complete-Nucleotide-Human-2020-05-11.one_line	470877038	5000	1	OST-DNA-bcm	6.07	160	91	2.8066	0.2995
DNA-NCBI-Virus-Complete-Nucleotide-Human-2020-05-11.one_line	470877038	10000	1	OST-DNA-bcm	6.12	156	92	2.8786	0.2987
DNA-NCBI-Virus-Complete-Nucleotide-Human-2020-05-11.one_line	470877038	25	2	OST-DNA-bcm	11.1	951	164	0.4722	0.3039
DNA-NCBI-Virus-Complete-Nucleotide-Human-2020-05-11.one_line	470877038	50	2	OST-DNA-bcm	8.62	565	116	0.7948	0.3337
DNA-NCBI-Virus-Complete-Nucleotide-Human-2020-05-11.one_line	470877038	100	2	OST-DNA-bcm	7.23	336	102	1.3365	0.3183
DNA-NCBI-Virus-Complete-Nucleotide-Human-2020-05-11.one_line	470877038	125	2	OST-DNA-bcm	6.93	310	98	1.4486	0.3176
DNA-NCBI-Virus-Complete-Nucleotide-Human-2020-05-11.one_line	470877038	150	2	OST-DNA-bcm	6.7	278	99	1.6153	0.3039
DNA-NCBI-Virus-Complete-Nucleotide-Human-2020-05-11.one_line	470877038	250	2	OST-DNA-bcm	6.44	254	108	1.768	0.2678
DNA-NCBI-Virus-Complete-Nucleotide-Human-2020-05-11.one_line	470877038	500	2	OST-DNA-bcm	6.24	266	115	1.6882	0.2437
DNA-NCBI-Virus-Complete-Nucleotide-Human-2020-05-11.one_line	470877038	750	2	OST-DNA-bcm	6.1	197	86	2.2795	0.3185
DNA-NCBI-Virus-Complete-Nucleotide-Human-2020-05-11.one_line	470877038	1000	2	OST-DNA-bcm	6.09	170	87	2.6415	0.3143
DNA-NCBI-Virus-Complete-Nucleotide-Human-2020-05-11.one_line	470877038	2500	2	OST-DNA-bcm	6.12	158	89	2.8422	0.3088
DNA-NCBI-Virus-Complete-Nucleotide-Human-2020-05-11.one_line	470877038	5000	2	OST-DNA-bcm	6.15	159	88	2.8243	0.3138
DNA-NCBI-Virus-Complete-Nucleotide-Human-2020-05-11.one_line	470877038	10000	2	OST-DNA-bcm	6.17	152	85	2.9544	0.326
DNA-NCBI-Virus-Complete-Nucleotide-Human-2020-05-11.one_line	470877038	25	3	OST-DNA-bcm	11.18	883	156	0.5086	0.3218
DNA-NCBI-Virus-Complete-Nucleotide-Human-2020-05-11.one_line	470877038	50	3	OST-DNA-bcm	8.62	535	115	0.8394	0.3366
DNA-NCBI-Virus-Complete-Nucleotide-Human-2020-05-11.one_line	470877038	100	3	OST-DNA-bcm	7.24	339	100	1.3247	0.3251
DNA-NCBI-Virus-Complete-Nucleotide-Human-2020-05-11.one_line	470877038	125	3	OST-DNA-bcm	6.94	304	94	1.4772	0.3315
DNA-NCBI-Virus-Complete-Nucleotide-Human-2020-05-11.one_line	470877038	150	3	OST-DNA-bcm	6.7	282	100	1.5924	0.3009
DNA-NCBI-Virus-Complete-Nucleotide-Human-2020-05-11.one_line	470877038	250	3	OST-DNA-bcm	6.44	224	98	2.0047	0.2951
DNA-NCBI-Virus-Complete-Nucleotide-Human-2020-05-11.one_line	470877038	500	3	OST-DNA-bcm	6.26	187	88	2.4014	0.3194
DNA-NCBI-Virus-Complete-Nucleotide-Human-2020-05-11.one_line	470877038	750	3	OST-DNA-bcm	6.12	193	94	2.3268	0.2924
DNA-NCBI-Virus-Complete-Nucleotide-Human-2020-05-11.one_line	470877038	1000	3	OST-DNA-bcm	6.11	172	93	2.6108	0.295
DNA-NCBI-Virus-Complete-Nucleotide-Human-2020-05-11.one_line	470877038	2500	3	OST-DNA-bcm	6.12	161	88	2.7892	0.3123
DNA-NCBI-Virus-Complete-Nucleotide-Human-2020-05-11.one_line	470877038	5000	3	OST-DNA-bcm	6.18	173	100	2.5957	0.2775
DNA-NCBI-Virus-Complete-Nucleotide-Human-2020-05-11.one_line	470877038	10000	3	OST-DNA-bcm	6.23	162	91	2.772	0.3074
DNA-NCBI-Virus-Complete-Nucleotide-Human-2020-05-11.one_line	470877038	25	4	OST-DNA-bcm	11.17	976	159	0.4601	0.3155
DNA-NCBI-Virus-Complete-Nucleotide-Human-2020-05-11.one_line	470877038	50	4	OST-DNA-bcm	8.62	623	118	0.7208	0.328
DNA-NCBI-Virus-Complete-Nucleotide-Human-2020-05-11.one_line	470877038	100	4	OST-DNA-bcm	7.23	370	106	1.2137	0.3063
DNA-NCBI-Virus-Complete-Nucleotide-Human-2020-05-11.one_line	470877038	125	4	OST-DNA-bcm	6.94	310	96	1.4486	0.3246
DNA-NCBI-Virus-Complete-Nucleotide-Human-2020-05-11.one_line	470877038	150	4	OST-DNA-bcm	6.69	280	96	1.6038	0.3129
DNA-NCBI-Virus-Complete-Nucleotide-Human-2020-05-11.one_line	470877038	250	4	OST-DNA-bcm	6.44	229	95	1.961	0.3044
DNA-NCBI-Virus-Complete-Nucleotide-Human-2020-05-11.one_line	470877038	500	4	OST-DNA-bcm	6.25	199	92	2.2566	0.3051
DNA-NCBI-Virus-Complete-Nucleotide-Human-2020-05-11.one_line	470877038	750	4	OST-DNA-bcm	6.13	180	90	2.4948	0.3059
DNA-NCBI-Virus-Complete-Nucleotide-Human-2020-05-11.one_line	470877038	1000	4	OST-DNA-bcm	6.12	175	90	2.5661	0.3054
DNA-NCBI-Virus-Complete-Nucleotide-Human-2020-05-11.one_line	470877038	2500	4	OST-DNA-bcm	6.09	170	96	2.6415	0.2849
DNA-NCBI-Virus-Complete-Nucleotide-Human-2020-05-11.one_line	470877038	5000	4	OST-DNA-bcm	6.23	160	89	2.8066	0.3143
DNA-NCBI-Virus-Complete-Nucleotide-Human-2020-05-11.one_line	470877038	10000	4	OST-DNA-bcm	6.29	156	94	2.8786	0.3005
DNA-NCBI-Virus-Complete-Nucleotide-Human-2020-05-11.one_line	470877038	25	5	OST-DNA-bcm	11.17	942	165	0.4767	0.304
DNA-NCBI-Virus-Complete-Nucleotide-Human-2020-05-11.one_line	470877038	50	5	OST-DNA-bcm	8.62	559	116	0.8033	0.3337
DNA-NCBI-Virus-Complete-Nucleotide-Human-2020-05-11.one_line	470877038	100	5	OST-DNA-bcm	7.23	377	108	1.1911	0.3006
DNA-NCBI-Virus-Complete-Nucleotide-Human-2020-05-11.one_line	470877038	125	5	OST-DNA-bcm	6.94	420	123	1.0692	0.2534
DNA-NCBI-Virus-Complete-Nucleotide-Human-2020-05-11.one_line	470877038	150	5	OST-DNA-bcm	6.69	288	106	1.5592	0.2834
DNA-NCBI-Virus-Complete-Nucleotide-Human-2020-05-11.one_line	470877038	250	5	OST-DNA-bcm	6.44	233	92	1.9273	0.3143
DNA-NCBI-Virus-Complete-Nucleotide-Human-2020-05-11.one_line	470877038	500	5	OST-DNA-bcm	6.25	196	102	2.2911	0.2752
DNA-NCBI-Virus-Complete-Nucleotide-Human-2020-05-11.one_line	470877038	750	5	OST-DNA-bcm	6.13	187	93	2.4014	0.296
DNA-NCBI-Virus-Complete-Nucleotide-Human-2020-05-11.one_line	470877038	1000	5	OST-DNA-bcm	6.12	182	97	2.4674	0.2833
DNA-NCBI-Virus-Complete-Nucleotide-Human-2020-05-11.one_line	470877038	2500	5	OST-DNA-bcm	6.09	165	98	2.7216	0.2791
DNA-NCBI-Virus-Complete-Nucleotide-Human-2020-05-11.one_line	470877038	5000	5	OST-DNA-bcm	6.24	167	96	2.689	0.2919
DNA-NCBI-Virus-Complete-Nucleotide-Human-2020-05-11.one_line	470877038	10000	5	OST-DNA-bcm	6.29	158	93	2.8422	0.3037
DNA-NCBI-Virus-Complete-Nucleotide-Human-2020-05-11.one_line	470877038	25	1	OST-DNA-brotli	6.22	2093	49	0.2146	0.57
DNA-NCBI-Virus-Complete-Nucleotide-Human-2020-05-11.one_line	470877038	50	1	OST-DNA-brotli	4.63	1752	23	0.2563	0.904
DNA-NCBI-Virus-Complete-Nucleotide-Human-2020-05-11.one_line	470877038	100	1	OST-DNA-brotli	3.55	1406	13	0.3194	1.2263
DNA-NCBI-Virus-Complete-Nucleotide-Human-2020-05-11.one_line	470877038	125	1	OST-DNA-brotli	3.29	1291	10	0.3478	1.4774
DNA-NCBI-Virus-Complete-Nucleotide-Human-2020-05-11.one_line	470877038	150	1	OST-DNA-brotli	3.16	1190	8	0.3774	1.7738
DNA-NCBI-Virus-Complete-Nucleotide-Human-2020-05-11.one_line	470877038	250	1	OST-DNA-brotli	2.8	1170	6	0.3838	2.0956
DNA-NCBI-Virus-Complete-Nucleotide-Human-2020-05-11.one_line	470877038	500	1	OST-DNA-brotli	2.53	826	4	0.5437	2.8403
DNA-NCBI-Virus-Complete-Nucleotide-Human-2020-05-11.one_line	470877038	750	1	OST-DNA-brotli	2.44	801	3	0.5606	3.6524
DNA-NCBI-Virus-Complete-Nucleotide-Human-2020-05-11.one_line	470877038	1000	1	OST-DNA-brotli	2.41	797	3	0.5634	3.6075
DNA-NCBI-Virus-Complete-Nucleotide-Human-2020-05-11.one_line	470877038	2500	1	OST-DNA-brotli	2.34	781	2	0.575	5.254
DNA-NCBI-Virus-Complete-Nucleotide-Human-2020-05-11.one_line	470877038	5000	1	OST-DNA-brotli	2.32	795	2	0.5649	5.2091
DNA-NCBI-Virus-Complete-Nucleotide-Human-2020-05-11.one_line	470877038	10000	1	OST-DNA-brotli	2.31	805	2	0.5578	5.1867
DNA-NCBI-Virus-Complete-Nucleotide-Human-2020-05-11.one_line	470877038	25	2	OST-DNA-brotli	6.92	2086	68	0.2153	0.457
DNA-NCBI-Virus-Complete-Nucleotide-Human-2020-05-11.one_line	470877038	50	2	OST-DNA-brotli	4.96	1803	28	0.2491	0.7955
DNA-NCBI-Virus-Complete-Nucleotide-Human-2020-05-11.one_line	470877038	100	2	OST-DNA-brotli	3.7	1371	13	0.3275	1.2781
DNA-NCBI-Virus-Complete-Nucleotide-Human-2020-05-11.one_line	470877038	125	2	OST-DNA-brotli	3.41	1310	11	0.3428	1.3921
DNA-NCBI-Virus-Complete-Nucleotide-Human-2020-05-11.one_line	470877038	150	2	OST-DNA-brotli	3.24	1239	9	0.3624	1.6166
DNA-NCBI-Virus-Complete-Nucleotide-Human-2020-05-11.one_line	470877038	250	2	OST-DNA-brotli	2.86	1174	6	0.3825	2.1405
DNA-NCBI-Virus-Complete-Nucleotide-Human-2020-05-11.one_line	470877038	500	2	OST-DNA-brotli	2.55	841	4	0.534	2.8628
DNA-NCBI-Virus-Complete-Nucleotide-Human-2020-05-11.one_line	470877038	750	2	OST-DNA-brotli	2.48	826	5	0.5437	2.2274
DNA-NCBI-Virus-Complete-Nucleotide-Human-2020-05-11.one_line	470877038	1000	2	OST-DNA-brotli	2.43	836	3	0.5372	3.6374
DNA-NCBI-Virus-Complete-Nucleotide-Human-2020-05-11.one_line	470877038	2500	2	OST-DNA-brotli	2.38	782	3	0.5742	3.5626
DNA-NCBI-Virus-Complete-Nucleotide-Human-2020-05-11.one_line	470877038	5000	2	OST-DNA-brotli	2.34	791	2	0.5677	5.254
DNA-NCBI-Virus-Complete-Nucleotide-Human-2020-05-11.one_line	470877038	10000	2	OST-DNA-brotli	2.34	874	2	0.5138	5.254
DNA-NCBI-Virus-Complete-Nucleotide-Human-2020-05-11.one_line	470877038	25	3	OST-DNA-brotli	7.03	2219	66	0.2024	0.4783
DNA-NCBI-Virus-Complete-Nucleotide-Human-2020-05-11.one_line	470877038	50	3	OST-DNA-brotli	4.97	1700	29	0.2642	0.7696
DNA-NCBI-Virus-Complete-Nucleotide-Human-2020-05-11.one_line	470877038	100	3	OST-DNA-brotli	3.71	1420	14	0.3162	1.19
DNA-NCBI-Virus-Complete-Nucleotide-Human-2020-05-11.one_line	470877038	125	3	OST-DNA-brotli	3.41	1293	11	0.3473	1.3921
DNA-NCBI-Virus-Complete-Nucleotide-Human-2020-05-11.one_line	470877038	150	3	OST-DNA-brotli	3.25	1210	10	0.3711	1.4595
DNA-NCBI-Virus-Complete-Nucleotide-Human-2020-05-11.one_line	470877038	250	3	OST-DNA-brotli	2.87	1051	7	0.4273	1.8412
DNA-NCBI-Virus-Complete-Nucleotide-Human-2020-05-11.one_line	470877038	500	3	OST-DNA-brotli	2.56	869	4	0.5168	2.874
DNA-NCBI-Virus-Complete-Nucleotide-Human-2020-05-11.one_line	470877038	750	3	OST-DNA-brotli	2.47	819	4	0.5483	2.773
DNA-NCBI-Virus-Complete-Nucleotide-Human-2020-05-11.one_line	470877038	1000	3	OST-DNA-brotli	2.43	806	3	0.5572	3.6374
DNA-NCBI-Virus-Complete-Nucleotide-Human-2020-05-11.one_line	470877038	2500	3	OST-DNA-brotli	2.37	767	3	0.5855	3.5476
DNA-NCBI-Virus-Complete-Nucleotide-Human-2020-05-11.one_line	470877038	5000	3	OST-DNA-brotli	2.35	784	2	0.5728	5.2765
DNA-NCBI-Virus-Complete-Nucleotide-Human-2020-05-11.one_line	470877038	10000	3	OST-DNA-brotli	2.37	802	2	0.5599	5.3214
DNA-NCBI-Virus-Complete-Nucleotide-Human-2020-05-11.one_line	470877038	25	4	OST-DNA-brotli	6.87	1976	66	0.2273	0.4674
DNA-NCBI-Virus-Complete-Nucleotide-Human-2020-05-11.one_line	470877038	50	4	OST-DNA-brotli	4.82	1688	28	0.266	0.773
DNA-NCBI-Virus-Complete-Nucleotide-Human-2020-05-11.one_line	470877038	100	4	OST-DNA-brotli	3.59	1380	14	0.3254	1.1515
DNA-NCBI-Virus-Complete-Nucleotide-Human-2020-05-11.one_line	470877038	125	4	OST-DNA-brotli	3.29	1239	12	0.3624	1.2312
DNA-NCBI-Virus-Complete-Nucleotide-Human-2020-05-11.one_line	470877038	150	4	OST-DNA-brotli	3.15	1192	10	0.3767	1.4145
DNA-NCBI-Virus-Complete-Nucleotide-Human-2020-05-11.one_line	470877038	250	4	OST-DNA-brotli	2.76	1005	7	0.4468	1.7706
DNA-NCBI-Virus-Complete-Nucleotide-Human-2020-05-11.one_line	470877038	500	4	OST-DNA-brotli	2.47	824	4	0.545	2.773
DNA-NCBI-Virus-Complete-Nucleotide-Human-2020-05-11.one_line	470877038	750	4	OST-DNA-brotli	2.38	799	4	0.562	2.6719
DNA-NCBI-Virus-Complete-Nucleotide-Human-2020-05-11.one_line	470877038	1000	4	OST-DNA-brotli	2.35	782	3	0.5742	3.5177
DNA-NCBI-Virus-Complete-Nucleotide-Human-2020-05-11.one_line	470877038	2500	4	OST-DNA-brotli	2.31	757	3	0.5932	3.4578
DNA-NCBI-Virus-Complete-Nucleotide-Human-2020-05-11.one_line	470877038	5000	4	OST-DNA-brotli	2.3	762	2	0.5893	5.1642
DNA-NCBI-Virus-Complete-Nucleotide-Human-2020-05-11.one_line	470877038	10000	4	OST-DNA-brotli	2.32	771	2	0.5824	5.2091
DNA-NCBI-Virus-Complete-Nucleotide-Human-2020-05-11.one_line	470877038	25	5	OST-DNA-brotli	6.87	1969	66	0.2281	0.4674
DNA-NCBI-Virus-Complete-Nucleotide-Human-2020-05-11.one_line	470877038	50	5	OST-DNA-brotli	4.82	1682	30	0.267	0.7215
DNA-NCBI-Virus-Complete-Nucleotide-Human-2020-05-11.one_line	470877038	100	5	OST-DNA-brotli	3.59	1367	14	0.3285	1.1515
DNA-NCBI-Virus-Complete-Nucleotide-Human-2020-05-11.one_line	470877038	125	5	OST-DNA-brotli	3.29	1277	12	0.3517	1.2312
DNA-NCBI-Virus-Complete-Nucleotide-Human-2020-05-11.one_line	470877038	150	5	OST-DNA-brotli	3.15	1203	10	0.3733	1.4145
DNA-NCBI-Virus-Complete-Nucleotide-Human-2020-05-11.one_line	470877038	250	5	OST-DNA-brotli	2.76	1023	7	0.439	1.7706
DNA-NCBI-Virus-Complete-Nucleotide-Human-2020-05-11.one_line	470877038	500	5	OST-DNA-brotli	2.47	834	4	0.5384	2.773
DNA-NCBI-Virus-Complete-Nucleotide-Human-2020-05-11.one_line	470877038	750	5	OST-DNA-brotli	2.38	809	4	0.5551	2.6719
DNA-NCBI-Virus-Complete-Nucleotide-Human-2020-05-11.one_line	470877038	1000	5	OST-DNA-brotli	2.35	802	3	0.5599	3.5177
DNA-NCBI-Virus-Complete-Nucleotide-Human-2020-05-11.one_line	470877038	2500	5	OST-DNA-brotli	2.31	776	3	0.5787	3.4578
DNA-NCBI-Virus-Complete-Nucleotide-Human-2020-05-11.one_line	470877038	5000	5	OST-DNA-brotli	2.3	770	2	0.5832	5.1642
DNA-NCBI-Virus-Complete-Nucleotide-Human-2020-05-11.one_line	470877038	10000	5	OST-DNA-brotli	2.32	777	2	0.5779	5.2091
DNA-NCBI-Virus-Complete-Nucleotide-Human-2020-05-11.one_line	470877038	25	1	OST-DNA-bsc	9.86	841	83	0.534	0.5335
DNA-NCBI-Virus-Complete-Nucleotide-Human-2020-05-11.one_line	470877038	50	1	OST-DNA-bsc	7.7	471	55	0.9534	0.6287
DNA-NCBI-Virus-Complete-Nucleotide-Human-2020-05-11.one_line	470877038	100	1	OST-DNA-bsc	6.4	352	41	1.2757	0.701
DNA-NCBI-Virus-Complete-Nucleotide-Human-2020-05-11.one_line	470877038	125	1	OST-DNA-bsc	6.16	259	39	1.7338	0.7093
DNA-NCBI-Virus-Complete-Nucleotide-Human-2020-05-11.one_line	470877038	150	1	OST-DNA-bsc	6	233	37	1.9273	0.7282
DNA-NCBI-Virus-Complete-Nucleotide-Human-2020-05-11.one_line	470877038	250	1	OST-DNA-bsc	5.63	183	33	2.4539	0.7661
DNA-NCBI-Virus-Complete-Nucleotide-Human-2020-05-11.one_line	470877038	500	1	OST-DNA-bsc	5.3	146	32	3.0758	0.7438
DNA-NCBI-Virus-Complete-Nucleotide-Human-2020-05-11.one_line	470877038	750	1	OST-DNA-bsc	5.25	156	30	2.8786	0.7859
DNA-NCBI-Virus-Complete-Nucleotide-Human-2020-05-11.one_line	470877038	1000	1	OST-DNA-bsc	5.22	130	30	3.4543	0.7814
DNA-NCBI-Virus-Complete-Nucleotide-Human-2020-05-11.one_line	470877038	2500	1	OST-DNA-bsc	5.2	126	30	3.564	0.7784
DNA-NCBI-Virus-Complete-Nucleotide-Human-2020-05-11.one_line	470877038	5000	1	OST-DNA-bsc	5.23	121	28	3.7113	0.8388
DNA-NCBI-Virus-Complete-Nucleotide-Human-2020-05-11.one_line	470877038	10000	1	OST-DNA-bsc	5.24	112	28	4.0095	0.8404
DNA-NCBI-Virus-Complete-Nucleotide-Human-2020-05-11.one_line	470877038	25	2	OST-DNA-bsc	10.23	847	95	0.5302	0.4836
DNA-NCBI-Virus-Complete-Nucleotide-Human-2020-05-11.one_line	470877038	50	2	OST-DNA-bsc	7.83	483	57	0.9297	0.6169
DNA-NCBI-Virus-Complete-Nucleotide-Human-2020-05-11.one_line	470877038	100	2	OST-DNA-bsc	6.49	298	42	1.5069	0.6939
DNA-NCBI-Virus-Complete-Nucleotide-Human-2020-05-11.one_line	470877038	125	2	OST-DNA-bsc	6.18	258	40	1.7406	0.6938
DNA-NCBI-Virus-Complete-Nucleotide-Human-2020-05-11.one_line	470877038	150	2	OST-DNA-bsc	6	236	37	1.9028	0.7282
DNA-NCBI-Virus-Complete-Nucleotide-Human-2020-05-11.one_line	470877038	250	2	OST-DNA-bsc	5.64	182	34	2.4674	0.7449
DNA-NCBI-Virus-Complete-Nucleotide-Human-2020-05-11.one_line	470877038	500	2	OST-DNA-bsc	5.31	147	31	3.0549	0.7692
DNA-NCBI-Virus-Complete-Nucleotide-Human-2020-05-11.one_line	470877038	750	2	OST-DNA-bsc	5.25	136	30	3.3019	0.7859
DNA-NCBI-Virus-Complete-Nucleotide-Human-2020-05-11.one_line	470877038	1000	2	OST-DNA-bsc	5.23	131	30	3.428	0.7829
DNA-NCBI-Virus-Complete-Nucleotide-Human-2020-05-11.one_line	470877038	2500	2	OST-DNA-bsc	5.26	121	30	3.7113	0.7874
DNA-NCBI-Virus-Complete-Nucleotide-Human-2020-05-11.one_line	470877038	5000	2	OST-DNA-bsc	5.22	116	29	3.8712	0.8083
DNA-NCBI-Virus-Complete-Nucleotide-Human-2020-05-11.one_line	470877038	10000	2	OST-DNA-bsc	5.26	112	29	4.0095	0.8145
DNA-NCBI-Virus-Complete-Nucleotide-Human-2020-05-11.one_line	470877038	25	3	OST-DNA-bsc	10.33	870	99	0.5162	0.4686
DNA-NCBI-Virus-Complete-Nucleotide-Human-2020-05-11.one_line	470877038	50	3	OST-DNA-bsc	7.84	487	58	0.9221	0.607
DNA-NCBI-Virus-Complete-Nucleotide-Human-2020-05-11.one_line	470877038	100	3	OST-DNA-bsc	6.5	298	40	1.5069	0.7297
DNA-NCBI-Virus-Complete-Nucleotide-Human-2020-05-11.one_line	470877038	125	3	OST-DNA-bsc	6.19	261	39	1.7205	0.7127
DNA-NCBI-Virus-Complete-Nucleotide-Human-2020-05-11.one_line	470877038	150	3	OST-DNA-bsc	6.01	240	39	1.8711	0.692
DNA-NCBI-Virus-Complete-Nucleotide-Human-2020-05-11.one_line	470877038	250	3	OST-DNA-bsc	5.65	189	35	2.376	0.7249
DNA-NCBI-Virus-Complete-Nucleotide-Human-2020-05-11.one_line	470877038	500	3	OST-DNA-bsc	5.32	150	32	2.9938	0.7466
DNA-NCBI-Virus-Complete-Nucleotide-Human-2020-05-11.one_line	470877038	750	3	OST-DNA-bsc	5.27	139	31	3.2307	0.7634
DNA-NCBI-Virus-Complete-Nucleotide-Human-2020-05-11.one_line	470877038	1000	3	OST-DNA-bsc	5.25	131	30	3.428	0.7859
DNA-NCBI-Virus-Complete-Nucleotide-Human-2020-05-11.one_line	470877038	2500	3	OST-DNA-bsc	5.28	121	29	3.7113	0.8176
DNA-NCBI-Virus-Complete-Nucleotide-Human-2020-05-11.one_line	470877038	5000	3	OST-DNA-bsc	5.26	116	29	3.8712	0.8145
DNA-NCBI-Virus-Complete-Nucleotide-Human-2020-05-11.one_line	470877038	10000	3	OST-DNA-bsc	5.3	134	29	3.3512	0.8207
DNA-NCBI-Virus-Complete-Nucleotide-Human-2020-05-11.one_line	470877038	25	4	OST-DNA-bsc	10.33	862	98	0.521	0.4733
DNA-NCBI-Virus-Complete-Nucleotide-Human-2020-05-11.one_line	470877038	50	4	OST-DNA-bsc	7.84	525	58	0.8554	0.607
DNA-NCBI-Virus-Complete-Nucleotide-Human-2020-05-11.one_line	470877038	100	4	OST-DNA-bsc	6.5	305	43	1.4723	0.6788
DNA-NCBI-Virus-Complete-Nucleotide-Human-2020-05-11.one_line	470877038	125	4	OST-DNA-bsc	6.19	265	39	1.6946	0.7127
DNA-NCBI-Virus-Complete-Nucleotide-Human-2020-05-11.one_line	470877038	150	4	OST-DNA-bsc	6.02	270	36	1.6632	0.7509
DNA-NCBI-Virus-Complete-Nucleotide-Human-2020-05-11.one_line	470877038	250	4	OST-DNA-bsc	5.65	192	35	2.3389	0.7249
DNA-NCBI-Virus-Complete-Nucleotide-Human-2020-05-11.one_line	470877038	500	4	OST-DNA-bsc	5.34	152	31	2.9544	0.7735
DNA-NCBI-Virus-Complete-Nucleotide-Human-2020-05-11.one_line	470877038	750	4	OST-DNA-bsc	5.28	139	31	3.2307	0.7649
DNA-NCBI-Virus-Complete-Nucleotide-Human-2020-05-11.one_line	470877038	1000	4	OST-DNA-bsc	5.26	132	29	3.402	0.8145
DNA-NCBI-Virus-Complete-Nucleotide-Human-2020-05-11.one_line	470877038	2500	4	OST-DNA-bsc	5.3	118	29	3.8056	0.8207
DNA-NCBI-Virus-Complete-Nucleotide-Human-2020-05-11.one_line	470877038	5000	4	OST-DNA-bsc	5.32	114	27	3.9392	0.8848
DNA-NCBI-Virus-Complete-Nucleotide-Human-2020-05-11.one_line	470877038	10000	4	OST-DNA-bsc	5.37	111	28	4.0456	0.8612
DNA-NCBI-Virus-Complete-Nucleotide-Human-2020-05-11.one_line	470877038	25	5	OST-DNA-bsc	10.33	887	100	0.5063	0.4639
DNA-NCBI-Virus-Complete-Nucleotide-Human-2020-05-11.one_line	470877038	50	5	OST-DNA-bsc	7.84	547	62	0.821	0.5678
DNA-NCBI-Virus-Complete-Nucleotide-Human-2020-05-11.one_line	470877038	100	5	OST-DNA-bsc	6.5	338	46	1.3286	0.6345
DNA-NCBI-Virus-Complete-Nucleotide-Human-2020-05-11.one_line	470877038	125	5	OST-DNA-bsc	6.19	284	47	1.5812	0.5914
DNA-NCBI-Virus-Complete-Nucleotide-Human-2020-05-11.one_line	470877038	150	5	OST-DNA-bsc	6.02	249	40	1.8035	0.6758
DNA-NCBI-Virus-Complete-Nucleotide-Human-2020-05-11.one_line	470877038	250	5	OST-DNA-bsc	5.65	196	37	2.2911	0.6857
DNA-NCBI-Virus-Complete-Nucleotide-Human-2020-05-11.one_line	470877038	500	5	OST-DNA-bsc	5.34	157	35	2.8603	0.6851
DNA-NCBI-Virus-Complete-Nucleotide-Human-2020-05-11.one_line	470877038	750	5	OST-DNA-bsc	5.28	141	30	3.1848	0.7904
DNA-NCBI-Virus-Complete-Nucleotide-Human-2020-05-11.one_line	470877038	1000	5	OST-DNA-bsc	5.26	135	31	3.3264	0.762
DNA-NCBI-Virus-Complete-Nucleotide-Human-2020-05-11.one_line	470877038	2500	5	OST-DNA-bsc	5.3	124	29	3.6215	0.8207
DNA-NCBI-Virus-Complete-Nucleotide-Human-2020-05-11.one_line	470877038	5000	5	OST-DNA-bsc	5.32	117	30	3.8381	0.7963
DNA-NCBI-Virus-Complete-Nucleotide-Human-2020-05-11.one_line	470877038	10000	5	OST-DNA-bsc	5.37	118	30	3.8056	0.8038
DNA-NCBI-Virus-Complete-Nucleotide-Human-2020-05-11.one_line	470877038	25	1	OST-DNA-bzip2	16.09	862	84	0.521	0.8602
DNA-NCBI-Virus-Complete-Nucleotide-Human-2020-05-11.one_line	470877038	50	1	OST-DNA-bzip2	13.45	589	48	0.7624	1.2583
DNA-NCBI-Virus-Complete-Nucleotide-Human-2020-05-11.one_line	470877038	100	1	OST-DNA-bzip2	12.11	320	32	1.4033	1.6994
DNA-NCBI-Virus-Complete-Nucleotide-Human-2020-05-11.one_line	470877038	125	1	OST-DNA-bzip2	11.83	278	30	1.6153	1.7708
DNA-NCBI-Virus-Complete-Nucleotide-Human-2020-05-11.one_line	470877038	150	1	OST-DNA-bzip2	11.69	261	30	1.7205	1.7499
DNA-NCBI-Virus-Complete-Nucleotide-Human-2020-05-11.one_line	470877038	250	1	OST-DNA-bzip2	11.41	222	26	2.0228	1.9707
DNA-NCBI-Virus-Complete-Nucleotide-Human-2020-05-11.one_line	470877038	500	1	OST-DNA-bzip2	11.19	192	24	2.3389	2.0938
DNA-NCBI-Virus-Complete-Nucleotide-Human-2020-05-11.one_line	470877038	750	1	OST-DNA-bzip2	11.18	177	23	2.5371	2.1828
DNA-NCBI-Virus-Complete-Nucleotide-Human-2020-05-11.one_line	470877038	1000	1	OST-DNA-bzip2	11.19	168	24	2.673	2.0938
DNA-NCBI-Virus-Complete-Nucleotide-Human-2020-05-11.one_line	470877038	2500	1	OST-DNA-bzip2	11.16	163	26	2.755	1.9275
DNA-NCBI-Virus-Complete-Nucleotide-Human-2020-05-11.one_line	470877038	5000	1	OST-DNA-bzip2	11.26	160	29	2.8066	1.7436
DNA-NCBI-Virus-Complete-Nucleotide-Human-2020-05-11.one_line	470877038	10000	1	OST-DNA-bzip2	11.44	160	23	2.8066	2.2336
DNA-NCBI-Virus-Complete-Nucleotide-Human-2020-05-11.one_line	470877038	25	2	OST-DNA-bzip2	16.25	857	86	0.524	0.8485
DNA-NCBI-Virus-Complete-Nucleotide-Human-2020-05-11.one_line	470877038	50	2	OST-DNA-bzip2	13.39	504	51	0.891	1.179
DNA-NCBI-Virus-Complete-Nucleotide-Human-2020-05-11.one_line	470877038	100	2	OST-DNA-bzip2	11.97	343	34	1.3092	1.581
DNA-NCBI-Virus-Complete-Nucleotide-Human-2020-05-11.one_line	470877038	125	2	OST-DNA-bzip2	11.71	295	36	1.5222	1.4607
DNA-NCBI-Virus-Complete-Nucleotide-Human-2020-05-11.one_line	470877038	150	2	OST-DNA-bzip2	11.6	263	31	1.7075	1.6804
DNA-NCBI-Virus-Complete-Nucleotide-Human-2020-05-11.one_line	470877038	250	2	OST-DNA-bzip2	11.32	218	28	2.0599	1.8155
DNA-NCBI-Virus-Complete-Nucleotide-Human-2020-05-11.one_line	470877038	500	2	OST-DNA-bzip2	11.14	183	24	2.4539	2.0844
DNA-NCBI-Virus-Complete-Nucleotide-Human-2020-05-11.one_line	470877038	750	2	OST-DNA-bzip2	11.12	175	25	2.5661	1.9974
DNA-NCBI-Virus-Complete-Nucleotide-Human-2020-05-11.one_line	470877038	1000	2	OST-DNA-bzip2	11.12	169	24	2.6572	2.0807
DNA-NCBI-Virus-Complete-Nucleotide-Human-2020-05-11.one_line	470877038	2500	2	OST-DNA-bzip2	11.13	163	23	2.755	2.1731
DNA-NCBI-Virus-Complete-Nucleotide-Human-2020-05-11.one_line	470877038	5000	2	OST-DNA-bzip2	11.34	155	22	2.8972	2.3147
DNA-NCBI-Virus-Complete-Nucleotide-Human-2020-05-11.one_line	470877038	10000	2	OST-DNA-bzip2	11.48	157	26	2.8603	1.9828
DNA-NCBI-Virus-Complete-Nucleotide-Human-2020-05-11.one_line	470877038	25	3	OST-DNA-bzip2	16.24	1046	88	0.4293	0.8287
DNA-NCBI-Virus-Complete-Nucleotide-Human-2020-05-11.one_line	470877038	50	3	OST-DNA-bzip2	13.39	494	51	0.909	1.179
DNA-NCBI-Virus-Complete-Nucleotide-Human-2020-05-11.one_line	470877038	100	3	OST-DNA-bzip2	11.98	323	34	1.3903	1.5823
DNA-NCBI-Virus-Complete-Nucleotide-Human-2020-05-11.one_line	470877038	125	3	OST-DNA-bzip2	11.71	279	31	1.6095	1.6963
DNA-NCBI-Virus-Complete-Nucleotide-Human-2020-05-11.one_line	470877038	150	3	OST-DNA-bzip2	11.59	259	29	1.7338	1.7947
DNA-NCBI-Virus-Complete-Nucleotide-Human-2020-05-11.one_line	470877038	250	3	OST-DNA-bzip2	11.36	222	28	2.0228	1.8219
DNA-NCBI-Virus-Complete-Nucleotide-Human-2020-05-11.one_line	470877038	500	3	OST-DNA-bzip2	11.17	186	24	2.4143	2.09
DNA-NCBI-Virus-Complete-Nucleotide-Human-2020-05-11.one_line	470877038	750	3	OST-DNA-bzip2	11.19	175	23	2.5661	2.1848
DNA-NCBI-Virus-Complete-Nucleotide-Human-2020-05-11.one_line	470877038	1000	3	OST-DNA-bzip2	11.18	173	23	2.5957	2.1828
DNA-NCBI-Virus-Complete-Nucleotide-Human-2020-05-11.one_line	470877038	2500	3	OST-DNA-bzip2	11.2	158	23	2.8422	2.1867
DNA-NCBI-Virus-Complete-Nucleotide-Human-2020-05-11.one_line	470877038	5000	3	OST-DNA-bzip2	11.33	154	23	2.916	2.2121
DNA-NCBI-Virus-Complete-Nucleotide-Human-2020-05-11.one_line	470877038	10000	3	OST-DNA-bzip2	11.49	153	24	2.9351	2.1499
DNA-NCBI-Virus-Complete-Nucleotide-Human-2020-05-11.one_line	470877038	25	4	OST-DNA-bzip2	16.24	911	90	0.4929	0.8103
DNA-NCBI-Virus-Complete-Nucleotide-Human-2020-05-11.one_line	470877038	50	4	OST-DNA-bzip2	13.4	521	50	0.8619	1.2035
DNA-NCBI-Virus-Complete-Nucleotide-Human-2020-05-11.one_line	470877038	100	4	OST-DNA-bzip2	12	349	34	1.2867	1.5849
DNA-NCBI-Virus-Complete-Nucleotide-Human-2020-05-11.one_line	470877038	125	4	OST-DNA-bzip2	11.7	293	35	1.5326	1.5012
DNA-NCBI-Virus-Complete-Nucleotide-Human-2020-05-11.one_line	470877038	150	4	OST-DNA-bzip2	11.56	278	33	1.6153	1.5731
DNA-NCBI-Virus-Complete-Nucleotide-Human-2020-05-11.one_line	470877038	250	4	OST-DNA-bzip2	11.34	240	27	1.8711	1.8861
DNA-NCBI-Virus-Complete-Nucleotide-Human-2020-05-11.one_line	470877038	500	4	OST-DNA-bzip2	11.17	208	27	2.159	1.8578
DNA-NCBI-Virus-Complete-Nucleotide-Human-2020-05-11.one_line	470877038	750	4	OST-DNA-bzip2	11.15	194	24	2.3148	2.0863
DNA-NCBI-Virus-Complete-Nucleotide-Human-2020-05-11.one_line	470877038	1000	4	OST-DNA-bzip2	11.22	206	24	2.1799	2.0994
DNA-NCBI-Virus-Complete-Nucleotide-Human-2020-05-11.one_line	470877038	2500	4	OST-DNA-bzip2	11.2	169	24	2.6572	2.0956
DNA-NCBI-Virus-Complete-Nucleotide-Human-2020-05-11.one_line	470877038	5000	4	OST-DNA-bzip2	11.41	169	30	2.6572	1.7079
DNA-NCBI-Virus-Complete-Nucleotide-Human-2020-05-11.one_line	470877038	10000	4	OST-DNA-bzip2	11.53	164	27	2.7382	1.9177
DNA-NCBI-Virus-Complete-Nucleotide-Human-2020-05-11.one_line	470877038	25	5	OST-DNA-bzip2	16.24	963	96	0.4663	0.7597
DNA-NCBI-Virus-Complete-Nucleotide-Human-2020-05-11.one_line	470877038	50	5	OST-DNA-bzip2	13.4	538	50	0.8347	1.2035
DNA-NCBI-Virus-Complete-Nucleotide-Human-2020-05-11.one_line	470877038	100	5	OST-DNA-bzip2	12	325	35	1.3817	1.5396
DNA-NCBI-Virus-Complete-Nucleotide-Human-2020-05-11.one_line	470877038	125	5	OST-DNA-bzip2	11.7	288	32	1.5592	1.6419
DNA-NCBI-Virus-Complete-Nucleotide-Human-2020-05-11.one_line	470877038	150	5	OST-DNA-bzip2	11.56	273	32	1.6449	1.6222
DNA-NCBI-Virus-Complete-Nucleotide-Human-2020-05-11.one_line	470877038	250	5	OST-DNA-bzip2	11.34	223	27	2.0137	1.8861
DNA-NCBI-Virus-Complete-Nucleotide-Human-2020-05-11.one_line	470877038	500	5	OST-DNA-bzip2	11.17	187	25	2.4014	2.0064
DNA-NCBI-Virus-Complete-Nucleotide-Human-2020-05-11.one_line	470877038	750	5	OST-DNA-bzip2	11.15	180	25	2.4948	2.0028
DNA-NCBI-Virus-Complete-Nucleotide-Human-2020-05-11.one_line	470877038	1000	5	OST-DNA-bzip2	11.22	171	24	2.6261	2.0994
DNA-NCBI-Virus-Complete-Nucleotide-Human-2020-05-11.one_line	470877038	2500	5	OST-DNA-bzip2	11.2	161	23	2.7892	2.1867
DNA-NCBI-Virus-Complete-Nucleotide-Human-2020-05-11.one_line	470877038	5000	5	OST-DNA-bzip2	11.41	167	25	2.689	2.0495
DNA-NCBI-Virus-Complete-Nucleotide-Human-2020-05-11.one_line	470877038	10000	5	OST-DNA-bzip2	11.53	155	23	2.8972	2.2512
DNA-NCBI-Virus-Complete-Nucleotide-Human-2020-05-11.one_line	470877038	25	1	OST-DNA-lrzip	5.65	1129	55	0.3978	0.4613
DNA-NCBI-Virus-Complete-Nucleotide-Human-2020-05-11.one_line	470877038	50	1	OST-DNA-lrzip	4.28	713	27	0.6298	0.7118
DNA-NCBI-Virus-Complete-Nucleotide-Human-2020-05-11.one_line	470877038	100	1	OST-DNA-lrzip	3.27	491	15	0.9146	0.979
DNA-NCBI-Virus-Complete-Nucleotide-Human-2020-05-11.one_line	470877038	125	1	OST-DNA-lrzip	2.99	499	13	0.8999	1.0328
DNA-NCBI-Virus-Complete-Nucleotide-Human-2020-05-11.one_line	470877038	150	1	OST-DNA-lrzip	2.79	476	11	0.9434	1.139
DNA-NCBI-Virus-Complete-Nucleotide-Human-2020-05-11.one_line	470877038	250	1	OST-DNA-lrzip	2.4	410	8	1.0953	1.3472
DNA-NCBI-Virus-Complete-Nucleotide-Human-2020-05-11.one_line	470877038	500	1	OST-DNA-lrzip	2.09	365	7	1.2303	1.3408
DNA-NCBI-Virus-Complete-Nucleotide-Human-2020-05-11.one_line	470877038	750	1	OST-DNA-lrzip	2	342	6	1.3131	1.4969
DNA-NCBI-Virus-Complete-Nucleotide-Human-2020-05-11.one_line	470877038	1000	1	OST-DNA-lrzip	1.95	340	5	1.3208	1.7513
DNA-NCBI-Virus-Complete-Nucleotide-Human-2020-05-11.one_line	470877038	2500	1	OST-DNA-lrzip	1.87	354	5	1.2685	1.6795
DNA-NCBI-Virus-Complete-Nucleotide-Human-2020-05-11.one_line	470877038	5000	1	OST-DNA-lrzip	1.85	337	4	1.3325	2.0769
DNA-NCBI-Virus-Complete-Nucleotide-Human-2020-05-11.one_line	470877038	10000	1	OST-DNA-lrzip	1.85	317	4	1.4166	2.0769
DNA-NCBI-Virus-Complete-Nucleotide-Human-2020-05-11.one_line	470877038	25	2	OST-DNA-lrzip	6.58	1214	68	0.3699	0.4345
DNA-NCBI-Virus-Complete-Nucleotide-Human-2020-05-11.one_line	470877038	50	2	OST-DNA-lrzip	4.7	776	33	0.5787	0.6396
DNA-NCBI-Virus-Complete-Nucleotide-Human-2020-05-11.one_line	470877038	100	2	OST-DNA-lrzip	3.47	555	18	0.8091	0.8657
DNA-NCBI-Virus-Complete-Nucleotide-Human-2020-05-11.one_line	470877038	125	2	OST-DNA-lrzip	3.14	486	15	0.924	0.94
DNA-NCBI-Virus-Complete-Nucleotide-Human-2020-05-11.one_line	470877038	150	2	OST-DNA-lrzip	2.92	477	13	0.9414	1.0087
DNA-NCBI-Virus-Complete-Nucleotide-Human-2020-05-11.one_line	470877038	250	2	OST-DNA-lrzip	2.47	395	10	1.1369	1.1092
DNA-NCBI-Virus-Complete-Nucleotide-Human-2020-05-11.one_line	470877038	500	2	OST-DNA-lrzip	2.13	358	7	1.2544	1.3664
DNA-NCBI-Virus-Complete-Nucleotide-Human-2020-05-11.one_line	470877038	750	2	OST-DNA-lrzip	2.03	334	7	1.3445	1.3023
DNA-NCBI-Virus-Complete-Nucleotide-Human-2020-05-11.one_line	470877038	1000	2	OST-DNA-lrzip	1.99	321	6	1.399	1.4894
DNA-NCBI-Virus-Complete-Nucleotide-Human-2020-05-11.one_line	470877038	2500	2	OST-DNA-lrzip	1.91	309	6	1.4533	1.4295
DNA-NCBI-Virus-Complete-Nucleotide-Human-2020-05-11.one_line	470877038	5000	2	OST-DNA-lrzip	1.88	319	5	1.4077	1.6885
DNA-NCBI-Virus-Complete-Nucleotide-Human-2020-05-11.one_line	470877038	10000	2	OST-DNA-lrzip	1.88	309	5	1.4533	1.6885
DNA-NCBI-Virus-Complete-Nucleotide-Human-2020-05-11.one_line	470877038	25	3	OST-DNA-lrzip	6.71	1185	72	0.379	0.4185
DNA-NCBI-Virus-Complete-Nucleotide-Human-2020-05-11.one_line	470877038	50	3	OST-DNA-lrzip	4.71	800	34	0.5613	0.6221
DNA-NCBI-Virus-Complete-Nucleotide-Human-2020-05-11.one_line	470877038	100	3	OST-DNA-lrzip	3.48	566	18	0.7934	0.8682
DNA-NCBI-Virus-Complete-Nucleotide-Human-2020-05-11.one_line	470877038	125	3	OST-DNA-lrzip	3.15	489	15	0.9183	0.943
DNA-NCBI-Virus-Complete-Nucleotide-Human-2020-05-11.one_line	470877038	150	3	OST-DNA-lrzip	2.93	478	14	0.9395	0.9398
DNA-NCBI-Virus-Complete-Nucleotide-Human-2020-05-11.one_line	470877038	250	3	OST-DNA-lrzip	2.48	397	10	1.1311	1.1137
DNA-NCBI-Virus-Complete-Nucleotide-Human-2020-05-11.one_line	470877038	500	3	OST-DNA-lrzip	2.14	368	8	1.2203	1.2012
DNA-NCBI-Virus-Complete-Nucleotide-Human-2020-05-11.one_line	470877038	750	3	OST-DNA-lrzip	2.05	326	7	1.3775	1.3151
DNA-NCBI-Virus-Complete-Nucleotide-Human-2020-05-11.one_line	470877038	1000	3	OST-DNA-lrzip	2.01	325	7	1.3817	1.2895
DNA-NCBI-Virus-Complete-Nucleotide-Human-2020-05-11.one_line	470877038	2500	3	OST-DNA-lrzip	1.93	314	6	1.4301	1.4445
DNA-NCBI-Virus-Complete-Nucleotide-Human-2020-05-11.one_line	470877038	5000	3	OST-DNA-lrzip	1.91	306	5	1.4675	1.7154
DNA-NCBI-Virus-Complete-Nucleotide-Human-2020-05-11.one_line	470877038	10000	3	OST-DNA-lrzip	1.92	310	5	1.4486	1.7244
DNA-NCBI-Virus-Complete-Nucleotide-Human-2020-05-11.one_line	470877038	25	4	OST-DNA-lrzip	6.71	1197	72	0.3752	0.4185
DNA-NCBI-Virus-Complete-Nucleotide-Human-2020-05-11.one_line	470877038	50	4	OST-DNA-lrzip	4.71	817	33	0.5496	0.6409
DNA-NCBI-Virus-Complete-Nucleotide-Human-2020-05-11.one_line	470877038	100	4	OST-DNA-lrzip	3.48	544	18	0.8255	0.8682
DNA-NCBI-Virus-Complete-Nucleotide-Human-2020-05-11.one_line	470877038	125	4	OST-DNA-lrzip	3.16	500	15	0.8981	0.946
DNA-NCBI-Virus-Complete-Nucleotide-Human-2020-05-11.one_line	470877038	150	4	OST-DNA-lrzip	2.93	494	27	0.909	0.4873
DNA-NCBI-Virus-Complete-Nucleotide-Human-2020-05-11.one_line	470877038	250	4	OST-DNA-lrzip	2.49	432	10	1.0395	1.1182
DNA-NCBI-Virus-Complete-Nucleotide-Human-2020-05-11.one_line	470877038	500	4	OST-DNA-lrzip	2.15	365	8	1.2303	1.2069
DNA-NCBI-Virus-Complete-Nucleotide-Human-2020-05-11.one_line	470877038	750	4	OST-DNA-lrzip	2.06	347	7	1.2941	1.3215
DNA-NCBI-Virus-Complete-Nucleotide-Human-2020-05-11.one_line	470877038	1000	4	OST-DNA-lrzip	2.02	338	7	1.3286	1.2959
DNA-NCBI-Virus-Complete-Nucleotide-Human-2020-05-11.one_line	470877038	2500	4	OST-DNA-lrzip	1.95	315	6	1.4256	1.4595
DNA-NCBI-Virus-Complete-Nucleotide-Human-2020-05-11.one_line	470877038	5000	4	OST-DNA-lrzip	1.93	318	5	1.4121	1.7334
DNA-NCBI-Virus-Complete-Nucleotide-Human-2020-05-11.one_line	470877038	10000	4	OST-DNA-lrzip	1.95	306	5	1.4675	1.7513
DNA-NCBI-Virus-Complete-Nucleotide-Human-2020-05-11.one_line	470877038	25	5	OST-DNA-lrzip	6.71	1192	73	0.3767	0.4128
DNA-NCBI-Virus-Complete-Nucleotide-Human-2020-05-11.one_line	470877038	50	5	OST-DNA-lrzip	4.71	822	34	0.5463	0.6221
DNA-NCBI-Virus-Complete-Nucleotide-Human-2020-05-11.one_line	470877038	100	5	OST-DNA-lrzip	3.48	533	19	0.8425	0.8225
DNA-NCBI-Virus-Complete-Nucleotide-Human-2020-05-11.one_line	470877038	125	5	OST-DNA-lrzip	3.16	451	16	0.9957	0.8869
DNA-NCBI-Virus-Complete-Nucleotide-Human-2020-05-11.one_line	470877038	150	5	OST-DNA-lrzip	2.93	416	14	1.0795	0.9398
DNA-NCBI-Virus-Complete-Nucleotide-Human-2020-05-11.one_line	470877038	250	5	OST-DNA-lrzip	2.49	358	10	1.2544	1.1182
DNA-NCBI-Virus-Complete-Nucleotide-Human-2020-05-11.one_line	470877038	500	5	OST-DNA-lrzip	2.15	315	8	1.4256	1.2069
DNA-NCBI-Virus-Complete-Nucleotide-Human-2020-05-11.one_line	470877038	750	5	OST-DNA-lrzip	2.06	299	7	1.5019	1.3215
DNA-NCBI-Virus-Complete-Nucleotide-Human-2020-05-11.one_line	470877038	1000	5	OST-DNA-lrzip	2.02	297	7	1.512	1.2959
DNA-NCBI-Virus-Complete-Nucleotide-Human-2020-05-11.one_line	470877038	2500	5	OST-DNA-lrzip	1.95	310	30	1.4486	0.2919
DNA-NCBI-Virus-Complete-Nucleotide-Human-2020-05-11.one_line	470877038	5000	5	OST-DNA-lrzip	1.93	277	5	1.6212	1.7334
DNA-NCBI-Virus-Complete-Nucleotide-Human-2020-05-11.one_line	470877038	10000	5	OST-DNA-lrzip	1.95	278	5	1.6153	1.7513
DNA-NCBI-Virus-Complete-Nucleotide-Human-2020-05-11.one_line	470877038	25	1	OST-DNA-lzip	7.06	1146	64	0.3919	0.4954
DNA-NCBI-Virus-Complete-Nucleotide-Human-2020-05-11.one_line	470877038	50	1	OST-DNA-lzip	5.51	775	26	0.5794	0.9517
DNA-NCBI-Virus-Complete-Nucleotide-Human-2020-05-11.one_line	470877038	100	1	OST-DNA-lzip	4.22	483	14	0.9297	1.3536
DNA-NCBI-Virus-Complete-Nucleotide-Human-2020-05-11.one_line	470877038	125	1	OST-DNA-lzip	3.91	442	12	1.016	1.4632
DNA-NCBI-Virus-Complete-Nucleotide-Human-2020-05-11.one_line	470877038	150	1	OST-DNA-lzip	3.7	414	11	1.0847	1.5105
DNA-NCBI-Virus-Complete-Nucleotide-Human-2020-05-11.one_line	470877038	250	1	OST-DNA-lzip	3.3	352	9	1.2757	1.6466
DNA-NCBI-Virus-Complete-Nucleotide-Human-2020-05-11.one_line	470877038	500	1	OST-DNA-lzip	2.98	321	6	1.399	2.2303
DNA-NCBI-Virus-Complete-Nucleotide-Human-2020-05-11.one_line	470877038	750	1	OST-DNA-lzip	2.88	306	5	1.4675	2.5866
DNA-NCBI-Virus-Complete-Nucleotide-Human-2020-05-11.one_line	470877038	1000	1	OST-DNA-lzip	2.84	285	5	1.5757	2.5507
DNA-NCBI-Virus-Complete-Nucleotide-Human-2020-05-11.one_line	470877038	2500	1	OST-DNA-lzip	2.75	277	4	1.6212	3.0873
DNA-NCBI-Virus-Complete-Nucleotide-Human-2020-05-11.one_line	470877038	5000	1	OST-DNA-lzip	2.76	278	4	1.6153	3.0985
DNA-NCBI-Virus-Complete-Nucleotide-Human-2020-05-11.one_line	470877038	10000	1	OST-DNA-lzip	2.77	281	4	1.5981	3.1098
DNA-NCBI-Virus-Complete-Nucleotide-Human-2020-05-11.one_line	470877038	25	2	OST-DNA-lzip	7.63	1148	66	0.3912	0.5191
DNA-NCBI-Virus-Complete-Nucleotide-Human-2020-05-11.one_line	470877038	50	2	OST-DNA-lzip	5.82	691	30	0.6499	0.8712
DNA-NCBI-Virus-Complete-Nucleotide-Human-2020-05-11.one_line	470877038	100	2	OST-DNA-lzip	4.37	477	16	0.9414	1.2265
DNA-NCBI-Virus-Complete-Nucleotide-Human-2020-05-11.one_line	470877038	125	2	OST-DNA-lzip	4.03	474	14	0.9474	1.2927
DNA-NCBI-Virus-Complete-Nucleotide-Human-2020-05-11.one_line	470877038	150	2	OST-DNA-lzip	3.79	513	12	0.8754	1.4183
DNA-NCBI-Virus-Complete-Nucleotide-Human-2020-05-11.one_line	470877038	250	2	OST-DNA-lzip	3.35	339	8	1.3247	1.8805
DNA-NCBI-Virus-Complete-Nucleotide-Human-2020-05-11.one_line	470877038	500	2	OST-DNA-lzip	3.01	298	6	1.5069	2.2528
[truncated: 5,141 more rows]
