# Supplementary material for: A Novel Lossless Encoding Algorithm for Data Compression
Source: Research Square preprint supplement (doi:10.21203/rs.3.rs-499681/v1), 2021-05-24
Supplement: Supplementary file 5 [file 976c9eb13dd0254fd964eb38.xlsx]

## Sheet: Sheet1
Genome	Genome Size (bytes)	Tool	Compression Ratio (%)	Compression Time (seconds)	Decompression Time (seconds)	Compression Speed (MB/s)	Decompression Speed (MB/s)
DNA-Genome-Picea-abies-GCA_900067695.1-2016-11-09.one_line	11960690255	bcm	23.6807	2485	2420	4.59018	1.1162
DNA-Genome-Picea-abies-GCA_900067695.1-2016-11-09.one_line	11960690255	blzpack	37.5351	168	87	67.8964	49.2124
DNA-Genome-Picea-abies-GCA_900067695.1-2016-11-09.one_line	11960690255	brotli	20.9853	45578	75	0.250266	31.9161
DNA-Genome-Picea-abies-GCA_900067695.1-2016-11-09.one_line	11960690255	bsc	23.6953	1738	33	6.56306	81.9038
DNA-Genome-Picea-abies-GCA_900067695.1-2016-11-09.one_line	11960690255	bzip2	26.8478	1413	604	8.07261	5.0702
DNA-Genome-Picea-abies-GCA_900067695.1-2016-11-09.one_line	11960690255	compress	25.7041	298	101	38.2772	29.0293
DNA-Genome-Picea-abies-GCA_900067695.1-2016-11-09.one_line	11960690255	freeze	28.0383	3973	147	2.87103	21.7566
DNA-Genome-Picea-abies-GCA_900067695.1-2016-11-09.one_line	11960690255	gzip	28.3777	2885	106	3.95376	30.5371
DNA-Genome-Picea-abies-GCA_900067695.1-2016-11-09.one_line	11960690255	hook	23.177	5538	5696	2.0597	0.4641
DNA-Genome-Picea-abies-GCA_900067695.1-2016-11-09.one_line	11960690255	Huffman-codec	27.3466	827	270	13.7927	11.553
DNA-Genome-Picea-abies-GCA_900067695.1-2016-11-09.one_line	11960690255	lizard	37.6027	8116	20	1.40545	214.46
DNA-Genome-Picea-abies-GCA_900067695.1-2016-11-09.one_line	11960690255	lrzip	18.18	16839	229	0.677392	9.0556
DNA-Genome-Picea-abies-GCA_900067695.1-2016-11-09.one_line	11960690255	lz4	55.1496	130	50	87.7431	125.814
DNA-Genome-Picea-abies-GCA_900067695.1-2016-11-09.one_line	11960690255	lzfse	30.0153	771	82	14.7946	41.7527
DNA-Genome-Picea-abies-GCA_900067695.1-2016-11-09.one_line	11960690255	lzip	21.0149	14524	232	0.785362	10.3323
DNA-Genome-Picea-abies-GCA_900067695.1-2016-11-09.one_line	11960690255	lzop	48.4521	120	75	95.055	73.6898
DNA-Genome-Picea-abies-GCA_900067695.1-2016-11-09.one_line	11960690255	LzTurbo	30.3947	131	29	87.0733	119.552
DNA-Genome-Picea-abies-GCA_900067695.1-2016-11-09.one_line	11960690255	pbzip2	26.8584	1425	602	8.00463	5.0891
DNA-Genome-Picea-abies-GCA_900067695.1-2016-11-09.one_line	11960690255	pigz	28.4156	2932	63	3.89038	51.4485
DNA-Genome-Picea-abies-GCA_900067695.1-2016-11-09.one_line	11960690255	ppm	24.0398	3341	4258	3.41413	0.644
DNA-Genome-Picea-abies-GCA_900067695.1-2016-11-09.one_line	11960690255	qzip	42.469	1088	84	10.484	57.6699
DNA-Genome-Picea-abies-GCA_900067695.1-2016-11-09.one_line	11960690255	rans	24.1587	92	58	123.985	47.5118
DNA-Genome-Picea-abies-GCA_900067695.1-2016-11-09.one_line	11960690255	rzip	26.8627	1468	590	7.77017	5.1934
DNA-Genome-Picea-abies-GCA_900067695.1-2016-11-09.one_line	11960690255	snzip	46.0932	127	48	89.8158	109.535
DNA-Genome-Picea-abies-GCA_900067695.1-2016-11-09.one_line	11960690255	srank	42.0523	583	573	19.5654	8.3713
DNA-Genome-Picea-abies-GCA_900067695.1-2016-11-09.one_line	11960690255	xz	21.0479	13803	203	0.826386	11.8268
DNA-Genome-Picea-abies-GCA_900067695.1-2016-11-09.one_line	11960690255	zip	28.3777	2866	106	3.97997	30.5371
DNA-Genome-Picea-abies-GCA_900067695.1-2016-11-09.one_line	11960690255	zlib	28.3968	2929	69	3.89437	46.9437
DNA-Genome-Picea-abies-GCA_900067695.1-2016-11-09.one_line	11960690255	zpipe	28.3968	2929	61	3.89437	53.1002
DNA-Genome-Picea-abies-GCA_900067695.1-2016-11-09.one_line	11960690255	zstd	29.8799	201	47	56.7493	72.5166
DNA-Helicobacter-2019-04-24.one_line	2711601413	bcm	16.2813	624	534	4.14421	0.7884
DNA-Helicobacter-2019-04-24.one_line	2711601413	blzpack	37.7701	25	34	103.439	28.7273
DNA-Helicobacter-2019-04-24.one_line	2711601413	brotli	5.1167	8670	7	0.298268	18.9025
DNA-Helicobacter-2019-04-24.one_line	2711601413	bsc	13.5951	308	8	8.39605	43.9461
DNA-Helicobacter-2019-04-24.one_line	2711601413	bzip2	26.408	462	375	5.59737	1.8211
DNA-Helicobacter-2019-04-24.one_line	2711601413	compress	25.1533	68	31	38.0292	20.9826
DNA-Helicobacter-2019-04-24.one_line	2711601413	freeze	27.944	1126	36	2.29661	20.073
DNA-Helicobacter-2019-04-24.one_line	2711601413	gzip	28.3274	773	34	3.34539	21.5454
DNA-Helicobacter-2019-04-24.one_line	2711601413	hook	20.4066	1168	1286	2.21403	0.4104
DNA-Helicobacter-2019-04-24.one_line	2711601413	Huffman-codec	27.4335	154	62	16.7921	11.4424
DNA-Helicobacter-2019-04-24.one_line	2711601413	lizard	37.164	1824	4	1.41775	240.264
DNA-Helicobacter-2019-04-24.one_line	2711601413	lrzip	4.4365	2468	26	1.04781	4.4126
DNA-Helicobacter-2019-04-24.one_line	2711601413	lz4	55.0801	12	8	215.499	178.045
DNA-Helicobacter-2019-04-24.one_line	2711601413	lzfse	29.1541	132	11	19.5908	68.5382
DNA-Helicobacter-2019-04-24.one_line	2711601413	lzip	6.3174	2676	25	0.966362	6.5347
DNA-Helicobacter-2019-04-24.one_line	2711601413	lzop	48.4139	12	11	215.499	113.816
DNA-Helicobacter-2019-04-24.one_line	2711601413	LzTurbo	30.5436	6	2	430.997	394.927
DNA-Helicobacter-2019-04-24.one_line	2711601413	pbzip2	26.4239	459	386	5.63395	1.7703
DNA-Helicobacter-2019-04-24.one_line	2711601413	pigz	28.3635	793	22	3.26101	33.3398
DNA-Helicobacter-2019-04-24.one_line	2711601413	ppm	23.2584	844	1005	3.06396	0.5985
DNA-Helicobacter-2019-04-24.one_line	2711601413	qzip	42.3469	192	15	13.4687	73.0057
DNA-Helicobacter-2019-04-24.one_line	2711601413	rans	24.0107	20	11	129.299	56.4466
DNA-Helicobacter-2019-04-24.one_line	2711601413	rzip	26.4109	482	290	5.36511	2.3551
DNA-Helicobacter-2019-04-24.one_line	2711601413	snzip	46.2021	12	8	215.499	149.347
DNA-Helicobacter-2019-04-24.one_line	2711601413	srank	36.1767	63	68	41.0474	13.7577
DNA-Helicobacter-2019-04-24.one_line	2711601413	xz	6.2707	2182	19	1.18514	8.5348
DNA-Helicobacter-2019-04-24.one_line	2711601413	zip	28.3275	753	32	3.43424	22.892
DNA-Helicobacter-2019-04-24.one_line	2711601413	zlib	28.345	791	23	3.26926	31.8694
DNA-Helicobacter-2019-04-24.one_line	2711601413	zpipe	28.345	787	21	3.28588	34.9046
DNA-Helicobacter-2019-04-24.one_line	2711601413	zstd	26.2109	25	11	103.439	61.6192
DNA-Influenza-2019-04-27.one_line	1106180040	bcm	2.3562	422	274	2.49985	0.0907
DNA-Influenza-2019-04-27.one_line	1106180040	blzpack	34.9056	10	7	105.494	52.6045
DNA-Influenza-2019-04-27.one_line	1106180040	brotli	0.966	1726	1	0.611202	10.1905
DNA-Influenza-2019-04-27.one_line	1106180040	bsc	2.0352	86	3	12.2667	7.1568
DNA-Influenza-2019-04-27.one_line	1106180040	bzip2	5.5597	289	53	3.6503	1.1066
DNA-Influenza-2019-04-27.one_line	1106180040	compress	23.6691	29	11	36.3771	22.6994
DNA-Influenza-2019-04-27.one_line	1106180040	freeze	22.24	350	17	3.0141	13.801
DNA-Influenza-2019-04-27.one_line	1106180040	gzip	11.497	111	7	9.50392	17.3266
DNA-Influenza-2019-04-27.one_line	1106180040	hook	4.6075	348	340	3.03142	0.143
DNA-Influenza-2019-04-27.one_line	1106180040	Huffman-codec	27.4045	64	25	16.4834	11.564
DNA-Influenza-2019-04-27.one_line	1106180040	lizard	6.4688	203	2	5.19673	34.121
DNA-Influenza-2019-04-27.one_line	1106180040	lrzip	1.0333	319	7	3.30701	1.5572
DNA-Influenza-2019-04-27.one_line	1106180040	lz4	29.4557	3	1	351.645	310.739
DNA-Influenza-2019-04-27.one_line	1106180040	lzfse	23.997	98	16	10.7646	15.8221
DNA-Influenza-2019-04-27.one_line	1106180040	lzip	1.2926	319	6	3.30701	2.2727
DNA-Influenza-2019-04-27.one_line	1106180040	lzop	40.172	4	4	263.734	105.947
DNA-Influenza-2019-04-27.one_line	1106180040	LzTurbo	8.1468	2	1	527.468	85.943
DNA-Influenza-2019-04-27.one_line	1106180040	pbzip2	5.7803	272	60	3.87844	1.0163
DNA-Influenza-2019-04-27.one_line	1106180040	pigz	11.4882	113	5	9.33571	24.2387
DNA-Influenza-2019-04-27.one_line	1106180040	ppm	23.5056	316	405	3.3384	0.6123
DNA-Influenza-2019-04-27.one_line	1106180040	qzip	37.7591	98	5	10.7646	79.6669
DNA-Influenza-2019-04-27.one_line	1106180040	rans	24.1319	8	5	131.867	50.9153
DNA-Influenza-2019-04-27.one_line	1106180040	rzip	6.0546	258	72	4.0889	0.8871
DNA-Influenza-2019-04-27.one_line	1106180040	snzip	40.55	4	2	263.734	213.888
DNA-Influenza-2019-04-27.one_line	1106180040	srank	44.1954	54	51	19.5358	9.1418
DNA-Influenza-2019-04-27.one_line	1106180040	xz	1.1647	252	4	4.18625	3.0718
DNA-Influenza-2019-04-27.one_line	1106180040	zip	11.497	108	8	9.76792	15.1608
DNA-Influenza-2019-04-27.one_line	1106180040	zlib	11.4896	113	5	9.33571	24.2415
DNA-Influenza-2019-04-27.one_line	1106180040	zpipe	11.4896	114	5	9.25382	24.2415
DNA-Influenza-2019-04-27.one_line	1106180040	zstd	2.5526	2	2	527.468	13.4641
DNA-Genome-Strongylocentrotus-purpuratus-GCF_000002235.4-2015-03-10.one_line	659082267	bcm	21.2087	195	197	3.22333	0.6767
DNA-Genome-Strongylocentrotus-purpuratus-GCF_000002235.4-2015-03-10.one_line	659082267	blzpack	32.8793	6	5	104.758	41.3326
DNA-Genome-Strongylocentrotus-purpuratus-GCF_000002235.4-2015-03-10.one_line	659082267	brotli	21.7718	2420	6	0.259731	22.8078
DNA-Genome-Strongylocentrotus-purpuratus-GCF_000002235.4-2015-03-10.one_line	659082267	bsc	21.2587	82	3	7.66524	44.5404
DNA-Genome-Strongylocentrotus-purpuratus-GCF_000002235.4-2015-03-10.one_line	659082267	bzip2	23.3789	71	32	8.85281	4.5921
DNA-Genome-Strongylocentrotus-purpuratus-GCF_000002235.4-2015-03-10.one_line	659082267	compress	22.923	14	5	44.8964	28.8164
DNA-Genome-Strongylocentrotus-purpuratus-GCF_000002235.4-2015-03-10.one_line	659082267	freeze	24.4158	189	9	3.32566	17.0517
DNA-Genome-Strongylocentrotus-purpuratus-GCF_000002235.4-2015-03-10.one_line	659082267	gzip	24.5066	134	5	4.69067	30.8072
DNA-Genome-Strongylocentrotus-purpuratus-GCF_000002235.4-2015-03-10.one_line	659082267	hook	21.2555	252	269	2.49425	0.4967
DNA-Genome-Strongylocentrotus-purpuratus-GCF_000002235.4-2015-03-10.one_line	659082267	Huffman-codec	28.8182	37	14	16.9878	12.9383
DNA-Genome-Strongylocentrotus-purpuratus-GCF_000002235.4-2015-03-10.one_line	659082267	lizard	32.1006	510	2	1.23245	100.884
DNA-Genome-Strongylocentrotus-purpuratus-GCF_000002235.4-2015-03-10.one_line	659082267	lrzip	20.1061	839	87	0.749165	1.4526
DNA-Genome-Strongylocentrotus-purpuratus-GCF_000002235.4-2015-03-10.one_line	659082267	lz4	47.2455	2	1	314.275	296.962
DNA-Genome-Strongylocentrotus-purpuratus-GCF_000002235.4-2015-03-10.one_line	659082267	lzfse	26.363	47	6	13.3734	27.6174
DNA-Genome-Strongylocentrotus-purpuratus-GCF_000002235.4-2015-03-10.one_line	659082267	lzip	21.2011	910	11	0.690714	12.1145
DNA-Genome-Strongylocentrotus-purpuratus-GCF_000002235.4-2015-03-10.one_line	659082267	lzop	42.5237	3	2	209.517	133.641
DNA-Genome-Strongylocentrotus-purpuratus-GCF_000002235.4-2015-03-10.one_line	659082267	LzTurbo	26.2092	2	1	314.275	164.738
DNA-Genome-Strongylocentrotus-purpuratus-GCF_000002235.4-2015-03-10.one_line	659082267	pbzip2	23.3826	71	29	8.85281	5.068
DNA-Genome-Strongylocentrotus-purpuratus-GCF_000002235.4-2015-03-10.one_line	659082267	pigz	24.5242	137	3	4.58795	51.3823
DNA-Genome-Strongylocentrotus-purpuratus-GCF_000002235.4-2015-03-10.one_line	659082267	ppm	21.3118	182	235	3.45357	0.57
DNA-Genome-Strongylocentrotus-purpuratus-GCF_000002235.4-2015-03-10.one_line	659082267	qzip	37.6003	77	5	8.16298	47.2673
DNA-Genome-Strongylocentrotus-purpuratus-GCF_000002235.4-2015-03-10.one_line	659082267	rans	21.3117	5	3	125.71	44.6515
DNA-Genome-Strongylocentrotus-purpuratus-GCF_000002235.4-2015-03-10.one_line	659082267	rzip	23.3803	73	217	8.61027	0.6772
DNA-Genome-Strongylocentrotus-purpuratus-GCF_000002235.4-2015-03-10.one_line	659082267	snzip	40.8976	2	2	314.275	128.531
DNA-Genome-Strongylocentrotus-purpuratus-GCF_000002235.4-2015-03-10.one_line	659082267	srank	38.3086	31	28	20.2758	8.5996
DNA-Genome-Strongylocentrotus-purpuratus-GCF_000002235.4-2015-03-10.one_line	659082267	xz	21.1886	864	13	0.727488	10.2447
DNA-Genome-Strongylocentrotus-purpuratus-GCF_000002235.4-2015-03-10.one_line	659082267	zip	24.5066	133	6	4.72594	25.6727
DNA-Genome-Strongylocentrotus-purpuratus-GCF_000002235.4-2015-03-10.one_line	659082267	zlib	24.5103	136	4	4.62169	38.5149
DNA-Genome-Strongylocentrotus-purpuratus-GCF_000002235.4-2015-03-10.one_line	659082267	zpipe	24.5103	137	3	4.58795	51.3532
DNA-Genome-Strongylocentrotus-purpuratus-GCF_000002235.4-2015-03-10.one_line	659082267	zstd	25.8418	6	2	104.758	81.2142
DNA-NCBI-Virus-Complete-Nucleotide-Human-2020-05-11.one_line	470877038	bcm	6.536	104	121	4.31792	0.2426
DNA-NCBI-Virus-Complete-Nucleotide-Human-2020-05-11.one_line	470877038	blzpack	36.9637	4	3	112.266	55.3301
DNA-NCBI-Virus-Complete-Nucleotide-Human-2020-05-11.one_line	470877038	brotli	2.4397	744	1	0.60358	10.9556
DNA-NCBI-Virus-Complete-Nucleotide-Human-2020-05-11.one_line	470877038	bsc	5.6347	53	2	8.47289	12.6517
DNA-NCBI-Virus-Complete-Nucleotide-Human-2020-05-11.one_line	470877038	bzip2	11.7169	119	19	3.77364	2.7693
DNA-NCBI-Virus-Complete-Nucleotide-Human-2020-05-11.one_line	470877038	compress	25.4809	11	5	40.8239	22.8851
DNA-NCBI-Virus-Complete-Nucleotide-Human-2020-05-11.one_line	470877038	freeze	25.3058	139	6	3.23067	18.9399
DNA-NCBI-Virus-Complete-Nucleotide-Human-2020-05-11.one_line	470877038	gzip	18.8061	81	3	5.54399	28.1504
DNA-NCBI-Virus-Complete-Nucleotide-Human-2020-05-11.one_line	470877038	hook	16.6697	177	166	2.53708	0.4509
DNA-NCBI-Virus-Complete-Nucleotide-Human-2020-05-11.one_line	470877038	Huffman-codec	27.8961	27	10	16.632	12.5271
DNA-NCBI-Virus-Complete-Nucleotide-Human-2020-05-11.one_line	470877038	lizard	18.4167	204	1	2.20129	82.7028
DNA-NCBI-Virus-Complete-Nucleotide-Human-2020-05-11.one_line	470877038	lrzip	1.8469	197	3	2.27951	2.7645
DNA-NCBI-Virus-Complete-Nucleotide-Human-2020-05-11.one_line	470877038	lz4	38.4893	2	1	224.532	172.841
DNA-NCBI-Virus-Complete-Nucleotide-Human-2020-05-11.one_line	470877038	lzfse	27.5456	28	3	16.038	41.2324
DNA-NCBI-Virus-Complete-Nucleotide-Human-2020-05-11.one_line	470877038	lzip	2.9864	353	4	1.27213	3.3528
DNA-NCBI-Virus-Complete-Nucleotide-Human-2020-05-11.one_line	470877038	lzop	45.0217	1	2	449.063	101.088
DNA-NCBI-Virus-Complete-Nucleotide-Human-2020-05-11.one_line	470877038	LzTurbo	16.1932	1	1	449.063	72.7175
DNA-NCBI-Virus-Complete-Nucleotide-Human-2020-05-11.one_line	470877038	pbzip2	11.8962	113	20	3.97401	2.6711
DNA-NCBI-Virus-Complete-Nucleotide-Human-2020-05-11.one_line	470877038	pigz	18.807	82	2	5.47638	42.2276
DNA-NCBI-Virus-Complete-Nucleotide-Human-2020-05-11.one_line	470877038	ppm	24.5699	148	175	3.03421	0.6305
DNA-NCBI-Virus-Complete-Nucleotide-Human-2020-05-11.one_line	470877038	qzip	42.0957	44	4	10.206	47.2591
DNA-NCBI-Virus-Complete-Nucleotide-Human-2020-05-11.one_line	470877038	rans	24.4543	5	2	89.8127	54.9076
DNA-NCBI-Virus-Complete-Nucleotide-Human-2020-05-11.one_line	470877038	rzip	12.1669	104	21	4.31792	2.6018
DNA-NCBI-Virus-Complete-Nucleotide-Human-2020-05-11.one_line	470877038	snzip	44.2084	2	1	224.532	198.524
DNA-NCBI-Virus-Complete-Nucleotide-Human-2020-05-11.one_line	470877038	srank	43.4481	23	22	19.5245	8.8686
DNA-NCBI-Virus-Complete-Nucleotide-Human-2020-05-11.one_line	470877038	xz	2.9219	283	3	1.5868	4.3738
DNA-NCBI-Virus-Complete-Nucleotide-Human-2020-05-11.one_line	470877038	zip	18.8062	80	3	5.61329	28.1505
DNA-NCBI-Virus-Complete-Nucleotide-Human-2020-05-11.one_line	470877038	zlib	18.8003	85	2	5.2831	42.2127
DNA-NCBI-Virus-Complete-Nucleotide-Human-2020-05-11.one_line	470877038	zpipe	18.8003	82	2	5.47638	42.2127
DNA-NCBI-Virus-Complete-Nucleotide-Human-2020-05-11.one_line	470877038	zstd	5.7045	2	1	224.532	25.6166
DNA-Genome-Kappaphycus-alvarezii-GCA_002205965.2-2018-03-09.one_line	249541865	bcm	24.7953	61	57	3.90134	1.0352
DNA-Genome-Kappaphycus-alvarezii-GCA_002205965.2-2018-03-09.one_line	249541865	blzpack	38.3967	2	1	118.991	91.3771
DNA-Genome-Kappaphycus-alvarezii-GCA_002205965.2-2018-03-09.one_line	249541865	brotli	23.2131	1235	1	0.192698	55.243
DNA-Genome-Kappaphycus-alvarezii-GCA_002205965.2-2018-03-09.one_line	249541865	bsc	24.9035	36	3	6.6106	19.7552
DNA-Genome-Kappaphycus-alvarezii-GCA_002205965.2-2018-03-09.one_line	249541865	bzip2	27.2218	58	38	4.10313	1.7048
DNA-Genome-Kappaphycus-alvarezii-GCA_002205965.2-2018-03-09.one_line	249541865	compress	26.584	6	2	39.6636	31.6325
DNA-Genome-Kappaphycus-alvarezii-GCA_002205965.2-2018-03-09.one_line	249541865	freeze	28.8078	94	3	2.53172	22.8524
DNA-Genome-Kappaphycus-alvarezii-GCA_002205965.2-2018-03-09.one_line	249541865	gzip	28.8211	101	3	2.35625	22.863
DNA-Genome-Kappaphycus-alvarezii-GCA_002205965.2-2018-03-09.one_line	249541865	hook	24.9301	111	114	2.14398	0.5204
DNA-Genome-Kappaphycus-alvarezii-GCA_002205965.2-2018-03-09.one_line	249541865	Huffman-codec	25	13	4	18.3063	14.8739
DNA-Genome-Kappaphycus-alvarezii-GCA_002205965.2-2018-03-09.one_line	249541865	lizard	38.2931	211	1	1.12788	91.1305
DNA-Genome-Kappaphycus-alvarezii-GCA_002205965.2-2018-03-09.one_line	249541865	lrzip	22.5678	335	5	0.710393	10.7415
DNA-Genome-Kappaphycus-alvarezii-GCA_002205965.2-2018-03-09.one_line	249541865	lz4	55.7827	1	1	237.982	132.753
DNA-Genome-Kappaphycus-alvarezii-GCA_002205965.2-2018-03-09.one_line	249541865	lzfse	30.7702	16	1	14.8739	73.2274
DNA-Genome-Kappaphycus-alvarezii-GCA_002205965.2-2018-03-09.one_line	249541865	lzip	24.8194	534	9	0.445659	6.5628
DNA-Genome-Kappaphycus-alvarezii-GCA_002205965.2-2018-03-09.one_line	249541865	lzop	49.4762	1	1	237.982	117.744
DNA-Genome-Kappaphycus-alvarezii-GCA_002205965.2-2018-03-09.one_line	249541865	LzTurbo	31.0691	2	1	118.991	73.9387
DNA-Genome-Kappaphycus-alvarezii-GCA_002205965.2-2018-03-09.one_line	249541865	pbzip2	27.24	55	51	4.32694	1.2711
DNA-Genome-Kappaphycus-alvarezii-GCA_002205965.2-2018-03-09.one_line	249541865	pigz	28.8541	100	2	2.37982	34.3337
DNA-Genome-Kappaphycus-alvarezii-GCA_002205965.2-2018-03-09.one_line	249541865	ppm	24.7374	65	81	3.66126	0.7268
DNA-Genome-Kappaphycus-alvarezii-GCA_002205965.2-2018-03-09.one_line	249541865	qzip	44.0713	20	1	11.8991	104.882
DNA-Genome-Kappaphycus-alvarezii-GCA_002205965.2-2018-03-09.one_line	249541865	rans	24.8181	2	1	118.991	59.0625
DNA-Genome-Kappaphycus-alvarezii-GCA_002205965.2-2018-03-09.one_line	249541865	rzip	27.2313	62	40	3.83841	1.6201
DNA-Genome-Kappaphycus-alvarezii-GCA_002205965.2-2018-03-09.one_line	249541865	snzip	46.8734	1	1	237.982	111.55
DNA-Genome-Kappaphycus-alvarezii-GCA_002205965.2-2018-03-09.one_line	249541865	srank	44.9795	13	11	18.3063	9.7312
DNA-Genome-Kappaphycus-alvarezii-GCA_002205965.2-2018-03-09.one_line	249541865	xz	24.8246	586	8	0.406112	7.3847
DNA-Genome-Kappaphycus-alvarezii-GCA_002205965.2-2018-03-09.one_line	249541865	zip	28.8213	100	5	2.37982	13.7179
DNA-Genome-Kappaphycus-alvarezii-GCA_002205965.2-2018-03-09.one_line	249541865	zlib	28.8378	98	2	2.42838	34.3144
DNA-Genome-Kappaphycus-alvarezii-GCA_002205965.2-2018-03-09.one_line	249541865	zpipe	28.8378	102	2	2.33315	34.3144
DNA-Genome-Kappaphycus-alvarezii-GCA_002205965.2-2018-03-09.one_line	249541865	zstd	30.327	3	1	79.3272	72.1727
DNA-Mitochondrion-2019-03-15.one_line	241606731	bcm	20.7056	124	63	1.85818	0.7573
DNA-Mitochondrion-2019-03-15.one_line	241606731	blzpack	37.7337	2	2	115.207	43.4719
DNA-Mitochondrion-2019-03-15.one_line	241606731	brotli	15.1591	1275	2	0.180717	17.4644
DNA-Mitochondrion-2019-03-15.one_line	241606731	bsc	20.0997	34	3	6.77689	15.4375
DNA-Mitochondrion-2019-03-15.one_line	241606731	bzip2	24.7112	34	31	6.77689	1.8367
DNA-Mitochondrion-2019-03-15.one_line	241606731	compress	25.9641	6	3	38.4024	19.9417
DNA-Mitochondrion-2019-03-15.one_line	241606731	freeze	28.1303	140	4	1.64582	16.204
DNA-Mitochondrion-2019-03-15.one_line	241606731	gzip	27.8572	74	3	3.1137	21.3956
DNA-Mitochondrion-2019-03-15.one_line	241606731	hook	20.859	113	104	2.03906	0.4621
DNA-Mitochondrion-2019-03-15.one_line	241606731	Huffman-codec	27.0976	14	5	16.4582	12.4874
DNA-Mitochondrion-2019-03-15.one_line	241606731	lizard	34.3331	170	1	1.35538	79.1084
DNA-Mitochondrion-2019-03-15.one_line	241606731	lrzip	13.3013	369	5	0.624429	6.1296
DNA-Mitochondrion-2019-03-15.one_line	241606731	lz4	54.7552	1	1	230.414	126.164
DNA-Mitochondrion-2019-03-15.one_line	241606731	lzb	52.8649	106197		0.00216969
DNA-Mitochondrion-2019-03-15.one_line	241606731	lzfse	30.0116	13	1	17.7242	69.1509
DNA-Mitochondrion-2019-03-15.one_line	241606731	lzip	15.739	395	5	0.583327	7.253
DNA-Mitochondrion-2019-03-15.one_line	241606731	lzop	48.4705	1	1	230.414	111.683
DNA-Mitochondrion-2019-03-15.one_line	241606731	LzTurbo	29.7252	2	1	115.207	68.4911
DNA-Mitochondrion-2019-03-15.one_line	241606731	pbzip2	24.7151	36	27	6.40039	2.1091
DNA-Mitochondrion-2019-03-15.one_line	241606731	pigz	27.8718	77	2	2.99239	32.1103
DNA-Mitochondrion-2019-03-15.one_line	241606731	ppm	24.0243	69	82	3.33934	0.6751
DNA-Mitochondrion-2019-03-15.one_line	241606731	qzip	42.6441	19	2	12.1271	49.129
DNA-Mitochondrion-2019-03-15.one_line	241606731	rans	24.1638	2	1	115.207	55.6768
DNA-Mitochondrion-2019-03-15.one_line	241606731	rzip	24.7794	40	23	5.76035	2.4824
DNA-Mitochondrion-2019-03-15.one_line	241606731	snzip	46.2082	1	1	230.414	106.47
DNA-Mitochondrion-2019-03-15.one_line	241606731	srank	42.187	12	11	19.2012	8.8368
DNA-Mitochondrion-2019-03-15.one_line	241606731	xz	15.6533	356	6	0.647231	6.0112
DNA-Mitochondrion-2019-03-15.one_line	241606731	zip	27.8573	76	3	3.03176	21.3957
DNA-Mitochondrion-2019-03-15.one_line	241606731	zlib	27.858	75	2	3.07219	32.0944
DNA-Mitochondrion-2019-03-15.one_line	241606731	zpipe	27.858	79	2	2.91663	32.0944
DNA-Mitochondrion-2019-03-15.one_line	241606731	zstd	26.1707	2	1	115.207	60.3009
DNA-Genome-Chondrus-crispus-GCA_000350225.2-2013-05-22.one_line	77592685	bcm	24.0516	26	28	2.84608	0.6356
DNA-Genome-Chondrus-crispus-GCA_000350225.2-2013-05-22.one_line	77592685	blzpack	37.8629	1	1	73.9982	28.0178
DNA-Genome-Chondrus-crispus-GCA_000350225.2-2013-05-22.one_line	77592685	brotli	19.4711	435	1	0.170111	14.4082
DNA-Genome-Chondrus-crispus-GCA_000350225.2-2013-05-22.one_line	77592685	bsc	23.4519	13	2	5.69217	8.677
DNA-Genome-Chondrus-crispus-GCA_000350225.2-2013-05-22.one_line	77592685	bzip2	26.8867	11	6	6.7271	3.3159
DNA-Genome-Chondrus-crispus-GCA_000350225.2-2013-05-22.one_line	77592685	compress	26.3639	2	1	36.9991	19.5088
DNA-Genome-Chondrus-crispus-GCA_000350225.2-2013-05-22.one_line	77592685	freeze	28.4219	25	2	2.95993	10.5159
DNA-Genome-Chondrus-crispus-GCA_000350225.2-2013-05-22.one_line	77592685	gzip	28.4698	21	1	3.52372	21.0671
DNA-Genome-Chondrus-crispus-GCA_000350225.2-2013-05-22.one_line	77592685	hook	24.2704	37	38	1.99995	0.4726
DNA-Genome-Chondrus-crispus-GCA_000350225.2-2013-05-22.one_line	77592685	Huffman-codec	28.1084	5	2	14.7996	10.3999
DNA-Genome-Chondrus-crispus-GCA_000350225.2-2013-05-22.one_line	77592685	lizard	37.7117	110	1	0.67271	27.9059
DNA-Genome-Chondrus-crispus-GCA_000350225.2-2013-05-22.one_line	77592685	lrzip	16.6392	111	2	0.66665	6.1564
DNA-Genome-Chondrus-crispus-GCA_000350225.2-2013-05-22.one_line	77592685	lz4	55.1198	1	1	73.9982	40.7876
DNA-Genome-Chondrus-crispus-GCA_000350225.2-2013-05-22.one_line	77592685	lzb	54.0992	33139	54835	0.00223296	0.0007
DNA-Genome-Chondrus-crispus-GCA_000350225.2-2013-05-22.one_line	77592685	lzfse	30.4301	4	1	18.4995	22.5177
DNA-Genome-Chondrus-crispus-GCA_000350225.2-2013-05-22.one_line	77592685	lzip	20.6372	112	2	0.660698	7.6356
DNA-Genome-Chondrus-crispus-GCA_000350225.2-2013-05-22.one_line	77592685	lzop	48.916	1	1	73.9982	36.1969
DNA-Genome-Chondrus-crispus-GCA_000350225.2-2013-05-22.one_line	77592685	LzTurbo	30.7091	2	1	36.9991	22.7242
DNA-Genome-Chondrus-crispus-GCA_000350225.2-2013-05-22.one_line	77592685	pbzip2	26.886	11	7	6.7271	2.8422
DNA-Genome-Chondrus-crispus-GCA_000350225.2-2013-05-22.one_line	77592685	pigz	28.5057	21	1	3.52372	21.0937
DNA-Genome-Chondrus-crispus-GCA_000350225.2-2013-05-22.one_line	77592685	ppm	24.4874	20	27	3.69991	0.6711
DNA-Genome-Chondrus-crispus-GCA_000350225.2-2013-05-22.one_line	77592685	qzip	43.4366	6	1	12.333	32.1423
DNA-Genome-Chondrus-crispus-GCA_000350225.2-2013-05-22.one_line	77592685	rans	24.6434	1	1	73.9982	18.2357
DNA-Genome-Chondrus-crispus-GCA_000350225.2-2013-05-22.one_line	77592685	rzip	26.8978	12	6	6.16651	3.3173
DNA-Genome-Chondrus-crispus-GCA_000350225.2-2013-05-22.one_line	77592685	snzip	46.3271	1	1	73.9982	34.2812
DNA-Genome-Chondrus-crispus-GCA_000350225.2-2013-05-22.one_line	77592685	srank	44.2007	4	4	18.4995	8.1769
DNA-Genome-Chondrus-crispus-GCA_000350225.2-2013-05-22.one_line	77592685	xz	20.6073	111	1	0.66665	15.2491
DNA-Genome-Chondrus-crispus-GCA_000350225.2-2013-05-22.one_line	77592685	zip	28.4703	20	1	3.69991	21.0675
DNA-Genome-Chondrus-crispus-GCA_000350225.2-2013-05-22.one_line	77592685	zlib	28.4882	20	1	3.69991	21.0807
DNA-Genome-Chondrus-crispus-GCA_000350225.2-2013-05-22.one_line	77592685	zpipe	28.4882	21	1	3.52372	21.0807
DNA-Genome-Chondrus-crispus-GCA_000350225.2-2013-05-22.one_line	77592685	zstd	29.7457	1	1	73.9982	22.0113
DNA-Genome-Salpingoeca-rosetta-GCA_000188695.1-2011-02-10.one_line	37299580	bcm	21.7069	9	10	3.95241	0.7722
DNA-Genome-Salpingoeca-rosetta-GCA_000188695.1-2011-02-10.one_line	37299580	blzpack	34.294	1	1	35.5717	12.1989
DNA-Genome-Salpingoeca-rosetta-GCA_000188695.1-2011-02-10.one_line	37299580	brotli	23.7339	171	1	0.208021	8.4425
DNA-Genome-Salpingoeca-rosetta-GCA_000188695.1-2011-02-10.one_line	37299580	bsc	21.8785	5	2	7.11433	3.8913
DNA-Genome-Salpingoeca-rosetta-GCA_000188695.1-2011-02-10.one_line	37299580	bzip2	24.1516	5	2	7.11433	4.2956
DNA-Genome-Salpingoeca-rosetta-GCA_000188695.1-2011-02-10.one_line	37299580	cmix	20.7691	77708		0.00045776
DNA-Genome-Salpingoeca-rosetta-GCA_000188695.1-2011-02-10.one_line	37299580	compress	23.9679	1	1	35.5717	8.5258
DNA-Genome-Salpingoeca-rosetta-GCA_000188695.1-2011-02-10.one_line	37299580	freeze	25.9359	12	1	2.9643	9.2258
DNA-Genome-Salpingoeca-rosetta-GCA_000188695.1-2011-02-10.one_line	37299580	gzip	26.1204	9	1	3.95241	9.2915
DNA-Genome-Salpingoeca-rosetta-GCA_000188695.1-2011-02-10.one_line	37299580	hook	22.2907	17	18	2.09245	0.4405
DNA-Genome-Salpingoeca-rosetta-GCA_000188695.1-2011-02-10.one_line	37299580	Huffman-codec	28.6556	2	1	17.7858	10.1933
DNA-Genome-Salpingoeca-rosetta-GCA_000188695.1-2011-02-10.one_line	37299580	lizard	34.4638	35	1	1.01633	12.2593
DNA-Genome-Salpingoeca-rosetta-GCA_000188695.1-2011-02-10.one_line	37299580	lrzip	22.1684	40	6	0.889291	1.3143
DNA-Genome-Salpingoeca-rosetta-GCA_000188695.1-2011-02-10.one_line	37299580	lz4	50.0925	1	1	35.5717	17.8187
DNA-Genome-Salpingoeca-rosetta-GCA_000188695.1-2011-02-10.one_line	37299580	lzb	48.6274	14063	24006	0.00252945	0.0007
DNA-Genome-Salpingoeca-rosetta-GCA_000188695.1-2011-02-10.one_line	37299580	lzfse	27.5943	1	1	35.5717	9.8158
DNA-Genome-Salpingoeca-rosetta-GCA_000188695.1-2011-02-10.one_line	37299580	lzip	22.6149	109	1	0.326345	8.0445
DNA-Genome-Salpingoeca-rosetta-GCA_000188695.1-2011-02-10.one_line	37299580	lzop	44.2244	1	1	35.5717	15.7313
DNA-Genome-Salpingoeca-rosetta-GCA_000188695.1-2011-02-10.one_line	37299580	LzTurbo	28.0723	1	1	35.5717	9.9858
DNA-Genome-Salpingoeca-rosetta-GCA_000188695.1-2011-02-10.one_line	37299580	Nakamichi	28.3528	1170	1	0.0304031	10.0855
DNA-Genome-Salpingoeca-rosetta-GCA_000188695.1-2011-02-10.one_line	37299580	pbzip2	24.1527	4	2	8.89291	4.2958
DNA-Genome-Salpingoeca-rosetta-GCA_000188695.1-2011-02-10.one_line	37299580	pigz	26.1484	9	1	3.95241	9.3014
DNA-Genome-Salpingoeca-rosetta-GCA_000188695.1-2011-02-10.one_line	37299580	ppm	21.7232	10	14	3.55717	0.552
DNA-Genome-Salpingoeca-rosetta-GCA_000188695.1-2011-02-10.one_line	37299580	qzip	39.0824	3	1	11.8572	13.9023
DNA-Genome-Salpingoeca-rosetta-GCA_000188695.1-2011-02-10.one_line	37299580	rans	21.9985	1	1	35.5717	7.8252
DNA-Genome-Salpingoeca-rosetta-GCA_000188695.1-2011-02-10.one_line	37299580	rzip	24.1634	4	10	8.89291	0.8595
DNA-Genome-Salpingoeca-rosetta-GCA_000188695.1-2011-02-10.one_line	37299580	snzip	42.4819	1	1	35.5717	15.1115
DNA-Genome-Salpingoeca-rosetta-GCA_000188695.1-2011-02-10.one_line	37299580	srank	39.2072	2	2	17.7858	6.9733
DNA-Genome-Salpingoeca-rosetta-GCA_000188695.1-2011-02-10.one_line	37299580	xz	22.5928	100	1	0.355717	8.0366
DNA-Genome-Salpingoeca-rosetta-GCA_000188695.1-2011-02-10.one_line	37299580	zip	26.1213	8	1	4.44646	9.2918
DNA-Genome-Salpingoeca-rosetta-GCA_000188695.1-2011-02-10.one_line	37299580	zlib	26.1315	9	1	3.95241	9.2954
DNA-Genome-Salpingoeca-rosetta-GCA_000188695.1-2011-02-10.one_line	37299580	zpipe	26.1315	10	1	3.55717	9.2954
DNA-Genome-Salpingoeca-rosetta-GCA_000188695.1-2011-02-10.one_line	37299580	zstd	27.4339	1	1	35.5717	9.7587
DNA-Genome-Fusarium-graminearum-PH-1-GCF_000240135.3-2008-11-21.one_line	34133023	bcm	24.7235	10	11	3.25518	0.7316
DNA-Genome-Fusarium-graminearum-PH-1-GCF_000240135.3-2008-11-21.one_line	34133023	blzpack	38.2058	1	1	32.5518	12.4367
DNA-Genome-Fusarium-graminearum-PH-1-GCF_000240135.3-2008-11-21.one_line	34133023	brotli	27.6542	143	1	0.227635	9.0019
DNA-Genome-Fusarium-graminearum-PH-1-GCF_000240135.3-2008-11-21.one_line	34133023	bsc	24.8846	6	2	5.4253	4.0502
DNA-Genome-Fusarium-graminearum-PH-1-GCF_000240135.3-2008-11-21.one_line	34133023	bzip2	27.0482	4	2	8.13795	4.4023
DNA-Genome-Fusarium-graminearum-PH-1-GCF_000240135.3-2008-11-21.one_line	34133023	cmix	24.4458	72653	71196	0.000448045	0.0001
DNA-Genome-Fusarium-graminearum-PH-1-GCF_000240135.3-2008-11-21.one_line	34133023	compress	26.5128	1	1	32.5518	8.6304
DNA-Genome-Fusarium-graminearum-PH-1-GCF_000240135.3-2008-11-21.one_line	34133023	freeze	28.9913	12	1	2.71265	9.4372
DNA-Genome-Fusarium-graminearum-PH-1-GCF_000240135.3-2008-11-21.one_line	34133023	gzip	28.9876	9	1	3.61687	9.436
DNA-Genome-Fusarium-graminearum-PH-1-GCF_000240135.3-2008-11-21.one_line	34133023	hook	25.502	18	20	1.80843	0.4151
DNA-Genome-Fusarium-graminearum-PH-1-GCF_000240135.3-2008-11-21.one_line	34133023	Huffman-codec	28.1003	2	1	16.2759	9.1471
DNA-Genome-Fusarium-graminearum-PH-1-GCF_000240135.3-2008-11-21.one_line	34133023	lizard	38.8696	33	1	0.986418	12.6528
DNA-Genome-Fusarium-graminearum-PH-1-GCF_000240135.3-2008-11-21.one_line	34133023	lrzip	26.3109	37	1	0.879778	8.5647
DNA-Genome-Fusarium-graminearum-PH-1-GCF_000240135.3-2008-11-21.one_line	34133023	lz4	56.0631	1	1	32.5518	18.2496
DNA-Genome-Fusarium-graminearum-PH-1-GCF_000240135.3-2008-11-21.one_line	34133023	lzb	54.8433	13742	24583	0.00236878	0.0007
DNA-Genome-Fusarium-graminearum-PH-1-GCF_000240135.3-2008-11-21.one_line	34133023	lzfse	30.6626	1	1	32.5518	9.9812
DNA-Genome-Fusarium-graminearum-PH-1-GCF_000240135.3-2008-11-21.one_line	34133023	lzip	26.7676	88	2	0.369907	4.3567
DNA-Genome-Fusarium-graminearum-PH-1-GCF_000240135.3-2008-11-21.one_line	34133023	lzop	49.4189	1	1	32.5518	16.0867
DNA-Genome-Fusarium-graminearum-PH-1-GCF_000240135.3-2008-11-21.one_line	34133023	LzTurbo	31.4294	1	1	32.5518	10.2308
DNA-Genome-Fusarium-graminearum-PH-1-GCF_000240135.3-2008-11-21.one_line	34133023	Nakamichi	32.6234	1498	1	0.0217302	10.6195
DNA-Genome-Fusarium-graminearum-PH-1-GCF_000240135.3-2008-11-21.one_line	34133023	pbzip2	27.0594	4	2	8.13795	4.4042
DNA-Genome-Fusarium-graminearum-PH-1-GCF_000240135.3-2008-11-21.one_line	34133023	pigz	29.0222	8	1	4.06897	9.4472
DNA-Genome-Fusarium-graminearum-PH-1-GCF_000240135.3-2008-11-21.one_line	34133023	ppm	24.6281	10	12	3.25518	0.6681
DNA-Genome-Fusarium-graminearum-PH-1-GCF_000240135.3-2008-11-21.one_line	34133023	qzip	43.8352	2	1	16.2759	14.2691
DNA-Genome-Fusarium-graminearum-PH-1-GCF_000240135.3-2008-11-21.one_line	34133023	rans	24.7639	1	1	32.5518	8.0611
DNA-Genome-Fusarium-graminearum-PH-1-GCF_000240135.3-2008-11-21.one_line	34133023	rzip	27.0689	4	3	8.13795	2.9371
DNA-Genome-Fusarium-graminearum-PH-1-GCF_000240135.3-2008-11-21.one_line	34133023	snzip	46.6719	1	1	32.5518	15.1925
DNA-Genome-Fusarium-graminearum-PH-1-GCF_000240135.3-2008-11-21.one_line	34133023	srank	44.966	2	1	16.2759	14.6373
DNA-Genome-Fusarium-graminearum-PH-1-GCF_000240135.3-2008-11-21.one_line	34133023	xz	26.3397	75	1	0.434024	8.574
DNA-Genome-Fusarium-graminearum-PH-1-GCF_000240135.3-2008-11-21.one_line	34133023	zip	28.9886	9	1	3.61687	9.4363
DNA-Genome-Fusarium-graminearum-PH-1-GCF_000240135.3-2008-11-21.one_line	34133023	zlib	29.0052	9	1	3.61687	9.4417
DNA-Genome-Fusarium-graminearum-PH-1-GCF_000240135.3-2008-11-21.one_line	34133023	zpipe	29.0052	9	1	3.61687	9.4417
DNA-Genome-Fusarium-graminearum-PH-1-GCF_000240135.3-2008-11-21.one_line	34133023	zstd	30.8178	1	1	32.5518	10.0317
DNA-Genome-Tieghemostelium-lacteum-GCA_001606155.1-2016-04-04.one_line	17671254	bcm	23.4042	4	4	4.21316	0.9861
DNA-Genome-Tieghemostelium-lacteum-GCA_001606155.1-2016-04-04.one_line	17671254	blzpack	37.8689	1	1	16.8526	6.3819
DNA-Genome-Tieghemostelium-lacteum-GCA_001606155.1-2016-04-04.one_line	17671254	brotli	24.1334	149	1	0.113105	4.0671
DNA-Genome-Tieghemostelium-lacteum-GCA_001606155.1-2016-04-04.one_line	17671254	bsc	23.8133	2	1	8.42631	4.0132
DNA-Genome-Tieghemostelium-lacteum-GCA_001606155.1-2016-04-04.one_line	17671254	bzip2	26.4999	2	1	8.42631	4.4659
DNA-Genome-Tieghemostelium-lacteum-GCA_001606155.1-2016-04-04.one_line	17671254	cmix	22.7026	36690	36377	0.000459325	0.0001
DNA-Genome-Tieghemostelium-lacteum-GCA_001606155.1-2016-04-04.one_line	17671254	compress	25.3284	1	1	16.8526	4.2685
DNA-Genome-Tieghemostelium-lacteum-GCA_001606155.1-2016-04-04.one_line	17671254	freeze	27.7595	7	1	2.40752	4.6782
DNA-Genome-Tieghemostelium-lacteum-GCA_001606155.1-2016-04-04.one_line	17671254	gzip	28.1599	5	1	3.37052	4.7457
DNA-Genome-Tieghemostelium-lacteum-GCA_001606155.1-2016-04-04.one_line	17671254	hook	24.2499	9	10	1.87251	0.4087
DNA-Genome-Tieghemostelium-lacteum-GCA_001606155.1-2016-04-04.one_line	17671254	Huffman-codec	25.0003	1	1	16.8526	4.2132
DNA-Genome-Tieghemostelium-lacteum-GCA_001606155.1-2016-04-04.one_line	17671254	lizard	37.3457	15	1	1.12351	6.2937
DNA-Genome-Tieghemostelium-lacteum-GCA_001606155.1-2016-04-04.one_line	17671254	lrzip	24.3269	17	1	0.991331	4.0997
DNA-Genome-Tieghemostelium-lacteum-GCA_001606155.1-2016-04-04.one_line	17671254	lz4	55.3235	1	1	16.8526	9.3235
DNA-Genome-Tieghemostelium-lacteum-GCA_001606155.1-2016-04-04.one_line	17671254	lzb	52.584	7376	12550	0.00228479	0.0007
DNA-Genome-Tieghemostelium-lacteum-GCA_001606155.1-2016-04-04.one_line	17671254	lzfse	30.0363	1	1	16.8526	5.0619
DNA-Genome-Tieghemostelium-lacteum-GCA_001606155.1-2016-04-04.one_line	17671254	lzip	24.4207	30	1	0.561754	4.1155
DNA-Genome-Tieghemostelium-lacteum-GCA_001606155.1-2016-04-04.one_line	17671254	lzop	48.1478	1	1	16.8526	8.1142
DNA-Genome-Tieghemostelium-lacteum-GCA_001606155.1-2016-04-04.one_line	17671254	LzTurbo	30.4252	1	1	16.8526	5.1274
DNA-Genome-Tieghemostelium-lacteum-GCA_001606155.1-2016-04-04.one_line	17671254	Nakamichi	30.2152	833	1	0.0202312	5.0921
DNA-Genome-Tieghemostelium-lacteum-GCA_001606155.1-2016-04-04.one_line	17671254	pbzip2	26.5009	2	1	8.42631	4.4661
DNA-Genome-Tieghemostelium-lacteum-GCA_001606155.1-2016-04-04.one_line	17671254	pigz	28.197	4	1	4.21316	4.7519
DNA-Genome-Tieghemostelium-lacteum-GCA_001606155.1-2016-04-04.one_line	17671254	ppm	23.4197	5	6	3.37052	0.6578
DNA-Genome-Tieghemostelium-lacteum-GCA_001606155.1-2016-04-04.one_line	17671254	qzip	42.4313	1	1	16.8526	7.1508
DNA-Genome-Tieghemostelium-lacteum-GCA_001606155.1-2016-04-04.one_line	17671254	rans	23.7001	1	1	16.8526	3.9941
DNA-Genome-Tieghemostelium-lacteum-GCA_001606155.1-2016-04-04.one_line	17671254	rzip	26.5134	2	1	8.42631	4.4682
DNA-Genome-Tieghemostelium-lacteum-GCA_001606155.1-2016-04-04.one_line	17671254	snzip	46.3084	1	1	16.8526	7.8042
DNA-Genome-Tieghemostelium-lacteum-GCA_001606155.1-2016-04-04.one_line	17671254	srank	41.8499	1	1	16.8526	7.0528
DNA-Genome-Tieghemostelium-lacteum-GCA_001606155.1-2016-04-04.one_line	17671254	xz	24.3861	26	1	0.648178	4.1097
DNA-Genome-Tieghemostelium-lacteum-GCA_001606155.1-2016-04-04.one_line	17671254	zip	28.1618	4	1	4.21316	4.746
DNA-Genome-Tieghemostelium-lacteum-GCA_001606155.1-2016-04-04.one_line	17671254	zlib	28.178	5	1	3.37052	4.7487
DNA-Genome-Tieghemostelium-lacteum-GCA_001606155.1-2016-04-04.one_line	17671254	zpipe	28.178	4	1	4.21316	4.7487
DNA-Genome-Tieghemostelium-lacteum-GCA_001606155.1-2016-04-04.one_line	17671254	zstd	29.5021	1	1	16.8526	4.9719
DNA-Genome-Spironucleus-salmonicida-GCA_000497125.1-2013-11-19.one_line	9934367	bcm	24.06	2	3	4.73708	0.7598
DNA-Genome-Spironucleus-salmonicida-GCA_000497125.1-2013-11-19.one_line	9934367	blzpack	37.9016	1	1	9.47415	3.5909
DNA-Genome-Spironucleus-salmonicida-GCA_000497125.1-2013-11-19.one_line	9934367	brotli	24.3898	56	1	0.169181	2.3107
DNA-Genome-Spironucleus-salmonicida-GCA_000497125.1-2013-11-19.one_line	9934367	bsc	24.1925	1	1	9.47415	2.292
DNA-Genome-Spironucleus-salmonicida-GCA_000497125.1-2013-11-19.one_line	9934367	bzip2	26.8558	1	1	9.47415	2.5444
DNA-Genome-Spironucleus-salmonicida-GCA_000497125.1-2013-11-19.one_line	9934367	cmix	21.9393	20656	19421	0.000458663	0.0001
DNA-Genome-Spironucleus-salmonicida-GCA_000497125.1-2013-11-19.one_line	9934367	compress	26.1235	1	1	9.47415	2.475
DNA-Genome-Spironucleus-salmonicida-GCA_000497125.1-2013-11-19.one_line	9934367	freeze	28.3182	4	1	2.36854	2.6829
DNA-Genome-Spironucleus-salmonicida-GCA_000497125.1-2013-11-19.one_line	9934367	gzip	28.5303	2	1	4.73708	2.703
DNA-Genome-Spironucleus-salmonicida-GCA_000497125.1-2013-11-19.one_line	9934367	hook	24.9463	6	6	1.57903	0.3939
DNA-Genome-Spironucleus-salmonicida-GCA_000497125.1-2013-11-19.one_line	9934367	Huffman-codec	27.5168	1	1	9.47415	2.607
DNA-Genome-Spironucleus-salmonicida-GCA_000497125.1-2013-11-19.one_line	9934367	lizard	37.7636	8	1	1.18427	3.5778
DNA-Genome-Spironucleus-salmonicida-GCA_000497125.1-2013-11-19.one_line	9934367	lrzip	23.6456	8	1	1.18427	2.2402
DNA-Genome-Spironucleus-salmonicida-GCA_000497125.1-2013-11-19.one_line	9934367	lz4	55.1515	1	1	9.47415	5.2251
DNA-Genome-Spironucleus-salmonicida-GCA_000497125.1-2013-11-19.one_line	9934367	lzb	53.4962	3933	6862	0.00240889	0.0007
DNA-Genome-Spironucleus-salmonicida-GCA_000497125.1-2013-11-19.one_line	9934367	lzfse	30.2943	1	1	9.47415	2.8701
DNA-Genome-Spironucleus-salmonicida-GCA_000497125.1-2013-11-19.one_line	9934367	lzip	23.7143	13	1	0.728781	2.2467
DNA-Genome-Spironucleus-salmonicida-GCA_000497125.1-2013-11-19.one_line	9934367	lzop	48.7622	1	1	9.47415	4.6198
DNA-Genome-Spironucleus-salmonicida-GCA_000497125.1-2013-11-19.one_line	9934367	LzTurbo	30.5004	1	1	9.47415	2.8897
DNA-Genome-Spironucleus-salmonicida-GCA_000497125.1-2013-11-19.one_line	9934367	Nakamichi	30.5582	290	1	0.0326695	2.8951
DNA-Genome-Spironucleus-salmonicida-GCA_000497125.1-2013-11-19.one_line	9934367	pbzip2	26.8884	1	1	9.47415	2.5475
DNA-Genome-Spironucleus-salmonicida-GCA_000497125.1-2013-11-19.one_line	9934367	pigz	28.5601	2	1	4.73708	2.7058
DNA-Genome-Spironucleus-salmonicida-GCA_000497125.1-2013-11-19.one_line	9934367	ppm	24.2428	3	4	3.15805	0.5742
DNA-Genome-Spironucleus-salmonicida-GCA_000497125.1-2013-11-19.one_line	9934367	qzip	43.2343	1	1	9.47415	4.0961
DNA-Genome-Spironucleus-salmonicida-GCA_000497125.1-2013-11-19.one_line	9934367	rans	24.3979	1	1	9.47415	2.3115
DNA-Genome-Spironucleus-salmonicida-GCA_000497125.1-2013-11-19.one_line	9934367	rzip	26.8848	1	1	9.47415	2.5471
DNA-Genome-Spironucleus-salmonicida-GCA_000497125.1-2013-11-19.one_line	9934367	snzip	46.4039	1	1	9.47415	4.3964
DNA-Genome-Spironucleus-salmonicida-GCA_000497125.1-2013-11-19.one_line	9934367	srank	43.2778	1	1	9.47415	4.1002
DNA-Genome-Spironucleus-salmonicida-GCA_000497125.1-2013-11-19.one_line	9934367	xz	23.6823	12	1	0.789513	2.2437
DNA-Genome-Spironucleus-salmonicida-GCA_000497125.1-2013-11-19.one_line	9934367	zip	28.5338	3	1	3.15805	2.7033
DNA-Genome-Spironucleus-salmonicida-GCA_000497125.1-2013-11-19.one_line	9934367	zlib	28.5442	2	1	4.73708	2.7043
DNA-Genome-Spironucleus-salmonicida-GCA_000497125.1-2013-11-19.one_line	9934367	zpipe	28.5442	3	1	3.15805	2.7043
DNA-Genome-Spironucleus-salmonicida-GCA_000497125.1-2013-11-19.one_line	9934367	zstd	29.6874	1	1	9.47415	2.8126
DNA-Genome-Cryptosporidium-parvum-Iowa-II-GCA_000165345.1-2007-02-26.one_line	7012512	bcm	23.7138	1	2	6.68765	0.7929
DNA-Genome-Cryptosporidium-parvum-Iowa-II-GCA_000165345.1-2007-02-26.one_line	7012512	blzpack	37.9689	1	1	6.68765	2.5392
DNA-Genome-Cryptosporidium-parvum-Iowa-II-GCA_000165345.1-2007-02-26.one_line	7012512	brotli	26.2723	34	1	0.196696	1.757
DNA-Genome-Cryptosporidium-parvum-Iowa-II-GCA_000165345.1-2007-02-26.one_line	7012512	bsc	24.1537	1	1	6.68765	1.6153
DNA-Genome-Cryptosporidium-parvum-Iowa-II-GCA_000165345.1-2007-02-26.one_line	7012512	bzip2	26.7519	1	1	6.68765	1.7891
DNA-Genome-Cryptosporidium-parvum-Iowa-II-GCA_000165345.1-2007-02-26.one_line	7012512	cmix	23.3527	12855	13591	0.000520237	0.0001
DNA-Genome-Cryptosporidium-parvum-Iowa-II-GCA_000165345.1-2007-02-26.one_line	7012512	compress	25.5792	1	1	6.68765	1.7106
DNA-Genome-Cryptosporidium-parvum-Iowa-II-GCA_000165345.1-2007-02-26.one_line	7012512	freeze	28.2379	2	1	3.34383	1.8885
DNA-Genome-Cryptosporidium-parvum-Iowa-II-GCA_000165345.1-2007-02-26.one_line	7012512	gzip	28.6797	2	1	3.34383	1.918
DNA-Genome-Cryptosporidium-parvum-Iowa-II-GCA_000165345.1-2007-02-26.one_line	7012512	hook	24.6928	4	3	1.67191	0.5505
DNA-Genome-Cryptosporidium-parvum-Iowa-II-GCA_000165345.1-2007-02-26.one_line	7012512	Huffman-codec	27.1478	1	1	6.68765	1.8155
DNA-Genome-Cryptosporidium-parvum-Iowa-II-GCA_000165345.1-2007-02-26.one_line	7012512	lizard	38.0222	5	1	1.33753	2.5428
DNA-Genome-Cryptosporidium-parvum-Iowa-II-GCA_000165345.1-2007-02-26.one_line	7012512	lrzip	25.337	5	1	1.33753	1.6945
DNA-Genome-Cryptosporidium-parvum-Iowa-II-GCA_000165345.1-2007-02-26.one_line	7012512	lz4	55.5459	1	1	6.68765	3.7147
DNA-Genome-Cryptosporidium-parvum-Iowa-II-GCA_000165345.1-2007-02-26.one_line	7012512	lzb	52.9323	2793	4784	0.00239443	0.0007
DNA-Genome-Cryptosporidium-parvum-Iowa-II-GCA_000165345.1-2007-02-26.one_line	7012512	lzfse	30.2627	1	1	6.68765	2.0239
DNA-Genome-Cryptosporidium-parvum-Iowa-II-GCA_000165345.1-2007-02-26.one_line	7012512	lzip	25.3953	8	1	0.835957	1.6983
DNA-Genome-Cryptosporidium-parvum-Iowa-II-GCA_000165345.1-2007-02-26.one_line	7012512	lzop	48.4944	1	1	6.68765	3.2431
DNA-Genome-Cryptosporidium-parvum-Iowa-II-GCA_000165345.1-2007-02-26.one_line	7012512	LzTurbo	30.7963	1	1	6.68765	2.0595
DNA-Genome-Cryptosporidium-parvum-Iowa-II-GCA_000165345.1-2007-02-26.one_line	7012512	Nakamichi	31.7832	201	1	0.0332719	2.1255
DNA-Genome-Cryptosporidium-parvum-Iowa-II-GCA_000165345.1-2007-02-26.one_line	7012512	pbzip2	26.7762	1	1	6.68765	1.7907
DNA-Genome-Cryptosporidium-parvum-Iowa-II-GCA_000165345.1-2007-02-26.one_line	7012512	pigz	28.7122	2	1	3.34383	1.9202
DNA-Genome-Cryptosporidium-parvum-Iowa-II-GCA_000165345.1-2007-02-26.one_line	7012512	ppm	23.6731	3	3	2.22922	0.5277
DNA-Genome-Cryptosporidium-parvum-Iowa-II-GCA_000165345.1-2007-02-26.one_line	7012512	qzip	42.9842	1	1	6.68765	2.8746
DNA-Genome-Cryptosporidium-parvum-Iowa-II-GCA_000165345.1-2007-02-26.one_line	7012512	rans	23.8264	1	1	6.68765	1.5934
DNA-Genome-Cryptosporidium-parvum-Iowa-II-GCA_000165345.1-2007-02-26.one_line	7012512	rzip	26.8008	1	1	6.68765	1.7923
DNA-Genome-Cryptosporidium-parvum-Iowa-II-GCA_000165345.1-2007-02-26.one_line	7012512	snzip	46.48	1	1	6.68765	3.1084
DNA-Genome-Cryptosporidium-parvum-Iowa-II-GCA_000165345.1-2007-02-26.one_line	7012512	srank	42.5056	1	1	6.68765	2.8426
DNA-Genome-Cryptosporidium-parvum-Iowa-II-GCA_000165345.1-2007-02-26.one_line	7012512	xz	25.3495	9	1	0.743073	1.6953
DNA-Genome-Cryptosporidium-parvum-Iowa-II-GCA_000165345.1-2007-02-26.one_line	7012512	zip	28.6847	1	1	6.68765	1.9183
DNA-Genome-Cryptosporidium-parvum-Iowa-II-GCA_000165345.1-2007-02-26.one_line	7012512	zlib	28.6956	2	1	3.34383	1.9191
DNA-Genome-Cryptosporidium-parvum-Iowa-II-GCA_000165345.1-2007-02-26.one_line	7012512	zpipe	28.6956	2	1	3.34383	1.9191
DNA-Genome-Cryptosporidium-parvum-Iowa-II-GCA_000165345.1-2007-02-26.one_line	7012512	zstd	30.0089	1	1	6.68765	2.0069
DNA-Genome-Nosema-ceranae-GCA_000988165.1-2015-05-05.one_line	3541094	bcm	23.5646	1	1	3.37705	0.7958
DNA-Genome-Nosema-ceranae-GCA_000988165.1-2015-05-05.one_line	3541094	blzpack	38.0663	1	1	3.37705	1.2855
DNA-Genome-Nosema-ceranae-GCA_000988165.1-2015-05-05.one_line	3541094	brotli	23.4043	15	1	0.225137	0.7904
DNA-Genome-Nosema-ceranae-GCA_000988165.1-2015-05-05.one_line	3541094	bsc	23.964	1	1	3.37705	0.8093
DNA-Genome-Nosema-ceranae-GCA_000988165.1-2015-05-05.one_line	3541094	bzip2	26.7147	1	1	3.37705	0.9022
DNA-Genome-Nosema-ceranae-GCA_000988165.1-2015-05-05.one_line	3541094	cmix	22.8527	6941	6743	0.000486537	0.0001
DNA-Genome-Nosema-ceranae-GCA_000988165.1-2015-05-05.one_line	3541094	compress	25.352	1	1	3.37705	0.8561
DNA-Genome-Nosema-ceranae-GCA_000988165.1-2015-05-05.one_line	3541094	freeze	28.2854	2	1	1.68853	0.9552
DNA-Genome-Nosema-ceranae-GCA_000988165.1-2015-05-05.one_line	3541094	gzip	28.7393	1	1	3.37705	0.9705
DNA-Genome-Nosema-ceranae-GCA_000988165.1-2015-05-05.one_line	3541094	hook	24.4764	2	1	1.68853	0.8266
DNA-Genome-Nosema-ceranae-GCA_000988165.1-2015-05-05.one_line	3541094	Huffman-codec	24.6645	1	1	3.37705	0.8329
DNA-Genome-Nosema-ceranae-GCA_000988165.1-2015-05-05.one_line	3541094	lizard	37.9572	2	1	1.68853	1.2818
DNA-Genome-Nosema-ceranae-GCA_000988165.1-2015-05-05.one_line	3541094	lrzip	24.3827	2	1	1.68853	0.8234
DNA-Genome-Nosema-ceranae-GCA_000988165.1-2015-05-05.one_line	3541094	lz4	55.5617	1	1	3.37705	1.8763
DNA-Genome-Nosema-ceranae-GCA_000988165.1-2015-05-05.one_line	3541094	lzb	52.9369	1431	2406	0.00235992	0.0007
DNA-Genome-Nosema-ceranae-GCA_000988165.1-2015-05-05.one_line	3541094	lzfse	30.3482	1	1	3.37705	1.0249
DNA-Genome-Nosema-ceranae-GCA_000988165.1-2015-05-05.one_line	3541094	lzip	24.4077	5	1	0.67541	0.8243
DNA-Genome-Nosema-ceranae-GCA_000988165.1-2015-05-05.one_line	3541094	lzop	48.6057	1	1	3.37705	1.6414
DNA-Genome-Nosema-ceranae-GCA_000988165.1-2015-05-05.one_line	3541094	LzTurbo	30.7467	1	1	3.37705	1.0383
DNA-Genome-Nosema-ceranae-GCA_000988165.1-2015-05-05.one_line	3541094	Nakamichi	31.3	77	1	0.0438578	1.057
DNA-Genome-Nosema-ceranae-GCA_000988165.1-2015-05-05.one_line	3541094	pbzip2	26.7141	1	1	3.37705	0.9022
DNA-Genome-Nosema-ceranae-GCA_000988165.1-2015-05-05.one_line	3541094	pigz	28.7749	1	1	3.37705	0.9717
DNA-Genome-Nosema-ceranae-GCA_000988165.1-2015-05-05.one_line	3541094	ppm	23.6218	1	3	3.37705	0.2659
DNA-Genome-Nosema-ceranae-GCA_000988165.1-2015-05-05.one_line	3541094	qzip	43.198	1	1	3.37705	1.4588
DNA-Genome-Nosema-ceranae-GCA_000988165.1-2015-05-05.one_line	3541094	rans	23.6912	1	1	3.37705	0.8001
DNA-Genome-Nosema-ceranae-GCA_000988165.1-2015-05-05.one_line	3541094	rzip	26.7396	1	1	3.37705	0.903
DNA-Genome-Nosema-ceranae-GCA_000988165.1-2015-05-05.one_line	3541094	snzip	46.6388	1	1	3.37705	1.575
DNA-Genome-Nosema-ceranae-GCA_000988165.1-2015-05-05.one_line	3541094	srank	42.591	1	1	3.37705	1.4383
DNA-Genome-Nosema-ceranae-GCA_000988165.1-2015-05-05.one_line	3541094	xz	24.386	4	1	0.844263	0.8235
DNA-Genome-Nosema-ceranae-GCA_000988165.1-2015-05-05.one_line	3541094	zip	28.7488	1	1	3.37705	0.9709
DNA-Genome-Nosema-ceranae-GCA_000988165.1-2015-05-05.one_line	3541094	zlib	28.7543	1	1	3.37705	0.971
DNA-Genome-Nosema-ceranae-GCA_000988165.1-2015-05-05.one_line	3541094	zpipe	28.7543	1	1	3.37705	0.971
DNA-Genome-Nosema-ceranae-GCA_000988165.1-2015-05-05.one_line	3541094	zstd	29.9116	1	1	3.37705	1.0101
DNA-Genome-Astrammina-rara-GCA_000211355.2-2011-04-27.one_line	1362918	bcm	24.8459	1	1	1.29978	0.3229
DNA-Genome-Astrammina-rara-GCA_000211355.2-2011-04-27.one_line	1362918	blzpack	38.0104	1	1	1.29978	0.4941
DNA-Genome-Astrammina-rara-GCA_000211355.2-2011-04-27.one_line	1362918	brotli	26.9848	5	1	0.259956	0.3507
DNA-Genome-Astrammina-rara-GCA_000211355.2-2011-04-27.one_line	1362918	bsc	25.0854	1	1	1.29978	0.3261
DNA-Genome-Astrammina-rara-GCA_000211355.2-2011-04-27.one_line	1362918	bzip2	27.251	1	1	1.29978	0.3542
DNA-Genome-Astrammina-rara-GCA_000211355.2-2011-04-27.one_line	1362918	cmix	24.157	2644	2665	0.000491596	0.0001
DNA-Genome-Astrammina-rara-GCA_000211355.2-2011-04-27.one_line	1362918	compress	26.8602	1	1	1.29978	0.3491
DNA-Genome-Astrammina-rara-GCA_000211355.2-2011-04-27.one_line	1362918	freeze	28.9073	1	1	1.29978	0.3757
DNA-Genome-Astrammina-rara-GCA_000211355.2-2011-04-27.one_line	1362918	gzip	29.0721	1	1	1.29978	0.3779
DNA-Genome-Astrammina-rara-GCA_000211355.2-2011-04-27.one_line	1362918	hook	25.8611	1	1	1.29978	0.3361
DNA-Genome-Astrammina-rara-GCA_000211355.2-2011-04-27.one_line	1362918	Huffman-codec	27.7017	1	1	1.29978	0.3601
DNA-Genome-Astrammina-rara-GCA_000211355.2-2011-04-27.one_line	1362918	lizard	38.7462	1	1	1.29978	0.5036
DNA-Genome-Astrammina-rara-GCA_000211355.2-2011-04-27.one_line	1362918	lrzip	26.1868	1	1	1.29978	0.3404
DNA-Genome-Astrammina-rara-GCA_000211355.2-2011-04-27.one_line	1362918	lz4	55.8357	1	1	1.29978	0.7257
DNA-Genome-Astrammina-rara-GCA_000211355.2-2011-04-27.one_line	1362918	lzb	54.5877	546	939	0.00238055	0.0008
DNA-Genome-Astrammina-rara-GCA_000211355.2-2011-04-27.one_line	1362918	lzfse	30.8202	1	1	1.29978	0.4006
DNA-Genome-Astrammina-rara-GCA_000211355.2-2011-04-27.one_line	1362918	lzip	26.6021	1	1	1.29978	0.3458
DNA-Genome-Astrammina-rara-GCA_000211355.2-2011-04-27.one_line	1362918	lzop	49.3795	1	1	1.29978	0.6418
DNA-Genome-Astrammina-rara-GCA_000211355.2-2011-04-27.one_line	1362918	LzTurbo	31.274	1	1	1.29978	0.4065
DNA-Genome-Astrammina-rara-GCA_000211355.2-2011-04-27.one_line	1362918	Nakamichi	34.5926	49	1	0.0265261	0.4496
DNA-Genome-Astrammina-rara-GCA_000211355.2-2011-04-27.one_line	1362918	pbzip2	27.2403	1	1	1.29978	0.3541
DNA-Genome-Astrammina-rara-GCA_000211355.2-2011-04-27.one_line	1362918	pigz	29.1073	1	1	1.29978	0.3783
DNA-Genome-Astrammina-rara-GCA_000211355.2-2011-04-27.one_line	1362918	ppm	24.9165	1	2	1.29978	0.1619
DNA-Genome-Astrammina-rara-GCA_000211355.2-2011-04-27.one_line	1362918	qzip	43.5436	1	1	1.29978	0.566
DNA-Genome-Astrammina-rara-GCA_000211355.2-2011-04-27.one_line	1362918	rans	24.8804	1	1	1.29978	0.3234
DNA-Genome-Astrammina-rara-GCA_000211355.2-2011-04-27.one_line	1362918	rzip	27.2702	1	1	1.29978	0.3545
DNA-Genome-Astrammina-rara-GCA_000211355.2-2011-04-27.one_line	1362918	snzip	46.6127	1	1	1.29978	0.6059
DNA-Genome-Astrammina-rara-GCA_000211355.2-2011-04-27.one_line	1362918	srank	44.1608	1	1	1.29978	0.574
DNA-Genome-Astrammina-rara-GCA_000211355.2-2011-04-27.one_line	1362918	xz	26.2645	1	1	1.29978	0.3414
DNA-Genome-Astrammina-rara-GCA_000211355.2-2011-04-27.one_line	1362918	zip	29.0968	1	1	1.29978	0.3782
DNA-Genome-Astrammina-rara-GCA_000211355.2-2011-04-27.one_line	1362918	zlib	29.0826	1	1	1.29978	0.378
DNA-Genome-Astrammina-rara-GCA_000211355.2-2011-04-27.one_line	1362918	zpipe	29.0826	1	1	1.29978	0.378
DNA-Genome-Astrammina-rara-GCA_000211355.2-2011-04-27.one_line	1362918	zstd	30.8655	1	1	1.29978	0.4012
DNA-Genome-WS1-bacterium-JGI-0000059-K21-GCA_000398605.1-2013-05-16.one_line	509551	bcm	23.8288	1	1	0.485946	0.1158
DNA-Genome-WS1-bacterium-JGI-0000059-K21-GCA_000398605.1-2013-05-16.one_line	509551	blzpack	38.058	1	1	0.485946	0.1849
DNA-Genome-WS1-bacterium-JGI-0000059-K21-GCA_000398605.1-2013-05-16.one_line	509551	brotli	27.0607	2	1	0.242973	0.1315
DNA-Genome-WS1-bacterium-JGI-0000059-K21-GCA_000398605.1-2013-05-16.one_line	509551	bsc	24.2759	1	1	0.485946	0.118
DNA-Genome-WS1-bacterium-JGI-0000059-K21-GCA_000398605.1-2013-05-16.one_line	509551	bzip2	26.658	1	1	0.485946	0.1295
DNA-Genome-WS1-bacterium-JGI-0000059-K21-GCA_000398605.1-2013-05-16.one_line	509551	cmix	23.1386	972	998	0.000499944	0.0001
DNA-Genome-WS1-bacterium-JGI-0000059-K21-GCA_000398605.1-2013-05-16.one_line	509551	compress	26.3622	1	1	0.485946	0.1281
DNA-Genome-WS1-bacterium-JGI-0000059-K21-GCA_000398605.1-2013-05-16.one_line	509551	freeze	28.4804	1	1	0.485946	0.1384
DNA-Genome-WS1-bacterium-JGI-0000059-K21-GCA_000398605.1-2013-05-16.one_line	509551	gzip	28.7999	1	1	0.485946	0.14
DNA-Genome-WS1-bacterium-JGI-0000059-K21-GCA_000398605.1-2013-05-16.one_line	509551	hook	24.9143	1	1	0.485946	0.1211
DNA-Genome-WS1-bacterium-JGI-0000059-K21-GCA_000398605.1-2013-05-16.one_line	509551	Huffman-codec	27.2128	1	1	0.485946	0.1322
DNA-Genome-WS1-bacterium-JGI-0000059-K21-GCA_000398605.1-2013-05-16.one_line	509551	lizard	38.3373	1	1	0.485946	0.1863
DNA-Genome-WS1-bacterium-JGI-0000059-K21-GCA_000398605.1-2013-05-16.one_line	509551	lrzip	26.1356	1	1	0.485946	0.127
DNA-Genome-WS1-bacterium-JGI-0000059-K21-GCA_000398605.1-2013-05-16.one_line	509551	lz4	55.7253	1	1	0.485946	0.2708
DNA-Genome-WS1-bacterium-JGI-0000059-K21-GCA_000398605.1-2013-05-16.one_line	509551	lzb	53.389	203	353	0.00239382	0.0007
DNA-Genome-WS1-bacterium-JGI-0000059-K21-GCA_000398605.1-2013-05-16.one_line	509551	lzfse	30.4617	1	1	0.485946	0.148
DNA-Genome-WS1-bacterium-JGI-0000059-K21-GCA_000398605.1-2013-05-16.one_line	509551	lzip	26.2406	1	1	0.485946	0.1275
DNA-Genome-WS1-bacterium-JGI-0000059-K21-GCA_000398605.1-2013-05-16.one_line	509551	lzop	48.663	1	1	0.485946	0.2365
DNA-Genome-WS1-bacterium-JGI-0000059-K21-GCA_000398605.1-2013-05-16.one_line	509551	LzTurbo	31.1512	1	1	0.485946	0.1514
DNA-Genome-WS1-bacterium-JGI-0000059-K21-GCA_000398605.1-2013-05-16.one_line	509551	Nakamichi	34.9262	197	1	0.00246673	0.1697
DNA-Genome-WS1-bacterium-JGI-0000059-K21-GCA_000398605.1-2013-05-16.one_line	509551	pbzip2	26.658	1	1	0.485946	0.1295
DNA-Genome-WS1-bacterium-JGI-0000059-K21-GCA_000398605.1-2013-05-16.one_line	509551	pigz	28.8354	1	1	0.485946	0.1401
DNA-Genome-WS1-bacterium-JGI-0000059-K21-GCA_000398605.1-2013-05-16.one_line	509551	ppm	24.031	1	1	0.485946	0.1168
DNA-Genome-WS1-bacterium-JGI-0000059-K21-GCA_000398605.1-2013-05-16.one_line	509551	qzip	42.9772	1	1	0.485946	0.2088
DNA-Genome-WS1-bacterium-JGI-0000059-K21-GCA_000398605.1-2013-05-16.one_line	509551	rans	24.1159	1	1	0.485946	0.1172
DNA-Genome-WS1-bacterium-JGI-0000059-K21-GCA_000398605.1-2013-05-16.one_line	509551	rzip	26.679	1	1	0.485946	0.1296
DNA-Genome-WS1-bacterium-JGI-0000059-K21-GCA_000398605.1-2013-05-16.one_line	509551	snzip	46.5889	1	1	0.485946	0.2264
DNA-Genome-WS1-bacterium-JGI-0000059-K21-GCA_000398605.1-2013-05-16.one_line	509551	srank	43.1604	1	1	0.485946	0.2097
DNA-Genome-WS1-bacterium-JGI-0000059-K21-GCA_000398605.1-2013-05-16.one_line	509551	xz	25.9601	1	1	0.485946	0.1262
DNA-Genome-WS1-bacterium-JGI-0000059-K21-GCA_000398605.1-2013-05-16.one_line	509551	zip	28.8687	1	1	0.485946	0.1403
DNA-Genome-WS1-bacterium-JGI-0000059-K21-GCA_000398605.1-2013-05-16.one_line	509551	zlib	28.8018	1	1	0.485946	0.14
DNA-Genome-WS1-bacterium-JGI-0000059-K21-GCA_000398605.1-2013-05-16.one_line	509551	zpipe	28.8018	1	1	0.485946	0.14
DNA-Genome-WS1-bacterium-JGI-0000059-K21-GCA_000398605.1-2013-05-16.one_line	509551	zstd	30.2694	1	1	0.485946	0.1471
DNA-Genome-Gordonia-phage-GAL1-GCF_001884535.1-2016-11-15.one_line	49979	bcm	23.918	1	1	0.0476637	0.0114
DNA-Genome-Gordonia-phage-GAL1-GCF_001884535.1-2016-11-15.one_line	49979	blzpack	38.172	1	1	0.0476637	0.0182
DNA-Genome-Gordonia-phage-GAL1-GCF_001884535.1-2016-11-15.one_line	49979	brotli	25.0265	1	1	0.0476637	0.0119
DNA-Genome-Gordonia-phage-GAL1-GCF_001884535.1-2016-11-15.one_line	49979	bsc	24.3782	1	1	0.0476637	0.0116
DNA-Genome-Gordonia-phage-GAL1-GCF_001884535.1-2016-11-15.one_line	49979	bzip2	26.6992	1	1	0.0476637	0.0127
DNA-Genome-Gordonia-phage-GAL1-GCF_001884535.1-2016-11-15.one_line	49979	cmix	23.5359	103	101	0.000462754	0.0001
DNA-Genome-Gordonia-phage-GAL1-GCF_001884535.1-2016-11-15.one_line	49979	compress	27.5196	1	1	0.0476637	0.0131
DNA-Genome-Gordonia-phage-GAL1-GCF_001884535.1-2016-11-15.one_line	49979	freeze	29.2943	1	1	0.0476637	0.014
DNA-Genome-Gordonia-phage-GAL1-GCF_001884535.1-2016-11-15.one_line	49979	gzip	29.1602	1	1	0.0476637	0.0139
DNA-Genome-Gordonia-phage-GAL1-GCF_001884535.1-2016-11-15.one_line	49979	hook	25.6228	1	1	0.0476637	0.0122
DNA-Genome-Gordonia-phage-GAL1-GCF_001884535.1-2016-11-15.one_line	49979	Huffman-codec	25.1125	1	1	0.0476637	0.012
DNA-Genome-Gordonia-phage-GAL1-GCF_001884535.1-2016-11-15.one_line	49979	lizard	41.3474	1	1	0.0476637	0.0197
DNA-Genome-Gordonia-phage-GAL1-GCF_001884535.1-2016-11-15.one_line	49979	lrzip	27.4075	1	1	0.0476637	0.0131
DNA-Genome-Gordonia-phage-GAL1-GCF_001884535.1-2016-11-15.one_line	49979	lz4	67.7865	1	1	0.0476637	0.0323
DNA-Genome-Gordonia-phage-GAL1-GCF_001884535.1-2016-11-15.one_line	49979	lzb	53.3884	21	36	0.0022697	0.0007
DNA-Genome-Gordonia-phage-GAL1-GCF_001884535.1-2016-11-15.one_line	49979	lzfse	30.6529	1	1	0.0476637	0.0146
DNA-Genome-Gordonia-phage-GAL1-GCF_001884535.1-2016-11-15.one_line	49979	lzip	27.2735	1	1	0.0476637	0.013
DNA-Genome-Gordonia-phage-GAL1-GCF_001884535.1-2016-11-15.one_line	49979	lzop	48.8105	1	1	0.0476637	0.0233
DNA-Genome-Gordonia-phage-GAL1-GCF_001884535.1-2016-11-15.one_line	49979	LzTurbo	31.8594	1	1	0.0476637	0.0152
DNA-Genome-Gordonia-phage-GAL1-GCF_001884535.1-2016-11-15.one_line	49979	Nakamichi	40.1709	27	1	0.00176532	0.0191
DNA-Genome-Gordonia-phage-GAL1-GCF_001884535.1-2016-11-15.one_line	49979	pbzip2	26.6992	1	1	0.0476637	0.0127
DNA-Genome-Gordonia-phage-GAL1-GCF_001884535.1-2016-11-15.one_line	49979	pigz	29.1602	1	1	0.0476637	0.0139
DNA-Genome-Gordonia-phage-GAL1-GCF_001884535.1-2016-11-15.one_line	49979	ppm	25.4007	1	1	0.0476637	0.0121
DNA-Genome-Gordonia-phage-GAL1-GCF_001884535.1-2016-11-15.one_line	49979	qzip	42.748	1	1	0.0476637	0.0204
DNA-Genome-Gordonia-phage-GAL1-GCF_001884535.1-2016-11-15.one_line	49979	rans	24.1702	1	1	0.0476637	0.0115
DNA-Genome-Gordonia-phage-GAL1-GCF_001884535.1-2016-11-15.one_line	49979	rzip	26.8713	1	1	0.0476637	0.0128
DNA-Genome-Gordonia-phage-GAL1-GCF_001884535.1-2016-11-15.one_line	49979	snzip	46.5676	1	1	0.0476637	0.0222
DNA-Genome-Gordonia-phage-GAL1-GCF_001884535.1-2016-11-15.one_line	49979	srank	42.6319	1	1	0.0476637	0.0203
DNA-Genome-Gordonia-phage-GAL1-GCF_001884535.1-2016-11-15.one_line	49979	xz	27.2594	1	1	0.0476637	0.013
DNA-Genome-Gordonia-phage-GAL1-GCF_001884535.1-2016-11-15.one_line	49979	zip	29.8425	1	1	0.0476637	0.0142
DNA-Genome-Gordonia-phage-GAL1-GCF_001884535.1-2016-11-15.one_line	49979	zlib	29.0022	1	1	0.0476637	0.0138
DNA-Genome-Gordonia-phage-GAL1-GCF_001884535.1-2016-11-15.one_line	49979	zpipe	29.0022	1	1	0.0476637	0.0138
DNA-Genome-Gordonia-phage-GAL1-GCF_001884535.1-2016-11-15.one_line	49979	zstd	31.1791	1	1	0.0476637	0.0149
